# Supplementary material
Source: MDPI journal article supplement (https://www.mdpi.com/2673-401X/4/1/5)

# Synthesis and Wittig Rearrangement of 3- and 4-Benzyloxyphenylphosphonates

R. Alan Aitken\* and Ryan A. Inwood

EaStCHEM School of Chemistry, University of St Andrews, North Haugh, St Andrews, Fife, KY16 9ST, UK.

## Supplementary Material

## Figure

|                                                                                                                  |                    |
|------------------------------------------------------------------------------------------------------------------|--------------------|
| <sup>1</sup> H NMR, <sup>31</sup> P NMR and DEPTQ <sup>13</sup> C NMR spectra of <b>8</b>                        | S1, S2, S3         |
| <sup>1</sup> H NMR, <sup>31</sup> P NMR and DEPTQ <sup>13</sup> C NMR spectra of <b>9</b>                        | S4, S5, S6         |
| <sup>1</sup> H NMR, <sup>31</sup> P NMR and DEPTQ <sup>13</sup> C NMR spectra of <b>10</b>                       | S7, S8, S9         |
| <sup>1</sup> H NMR, <sup>31</sup> P NMR and DEPTQ <sup>13</sup> C NMR spectra of <b>11</b>                       | S10, S11, S12      |
| <sup>1</sup> H NMR, <sup>31</sup> P NMR and DEPTQ <sup>13</sup> C NMR spectra of <b>12</b>                       | S13, S14, S15      |
| <sup>1</sup> H NMR, <sup>31</sup> P NMR and DEPTQ <sup>13</sup> C NMR spectra of <b>13a</b>                      | S16, S17, S18      |
| <sup>1</sup> H NMR, <sup>31</sup> P NMR and DEPTQ <sup>13</sup> C NMR spectra of <b>13b</b>                      | S19, S20, S21      |
| <sup>1</sup> H NMR, <sup>19</sup> F NMR, <sup>31</sup> P NMR and DEPTQ <sup>13</sup> C NMR spectra of <b>13c</b> | S22, S23, S24, S25 |
| <sup>1</sup> H NMR, <sup>31</sup> P NMR and DEPTQ <sup>13</sup> C NMR spectra of <b>13d</b>                      | S26, S27, S28      |
| <sup>1</sup> H NMR, <sup>31</sup> P NMR and DEPTQ <sup>13</sup> C NMR spectra of <b>13e</b>                      | S29, S30, S31      |
| <sup>1</sup> H NMR, <sup>31</sup> P NMR and DEPTQ <sup>13</sup> C NMR spectra of <b>14a</b>                      | S32, S33, S34      |
| <sup>1</sup> H NMR, <sup>31</sup> P NMR and DEPTQ <sup>13</sup> C NMR spectra of <b>14b</b>                      | S35, S36, S37      |
| <sup>1</sup> H NMR, <sup>19</sup> F NMR, <sup>31</sup> P NMR and DEPTQ <sup>13</sup> C NMR spectra of <b>14c</b> | S38, S39, S40, S41 |
| <sup>1</sup> H NMR, <sup>31</sup> P NMR and DEPTQ <sup>13</sup> C NMR spectra of <b>14d</b>                      | S42, S43, S44      |
| <sup>1</sup> H NMR, <sup>31</sup> P NMR and DEPTQ <sup>13</sup> C NMR spectra of <b>16</b>                       | S45, S46, S47      |
| <sup>1</sup> H NMR, <sup>31</sup> P NMR and DEPTQ <sup>13</sup> C NMR spectra of <b>17</b>                       | S48, S49, S50      |

$^1\text{H}$  NMR,  $^{31}\text{P}$  NMR and DEPTQ  $^{13}\text{C}$  NMR spectra of **18**

S51, S52, S53

$^1\text{H}$  NMR,  $^{31}\text{P}$  NMR and DEPTQ  $^{13}\text{C}$  NMR spectra of **19**

S54, S55, S56, S57

Figure S1. 400 MHz DEPTQ  $^1\text{H}$  NMR spectrum of **8**

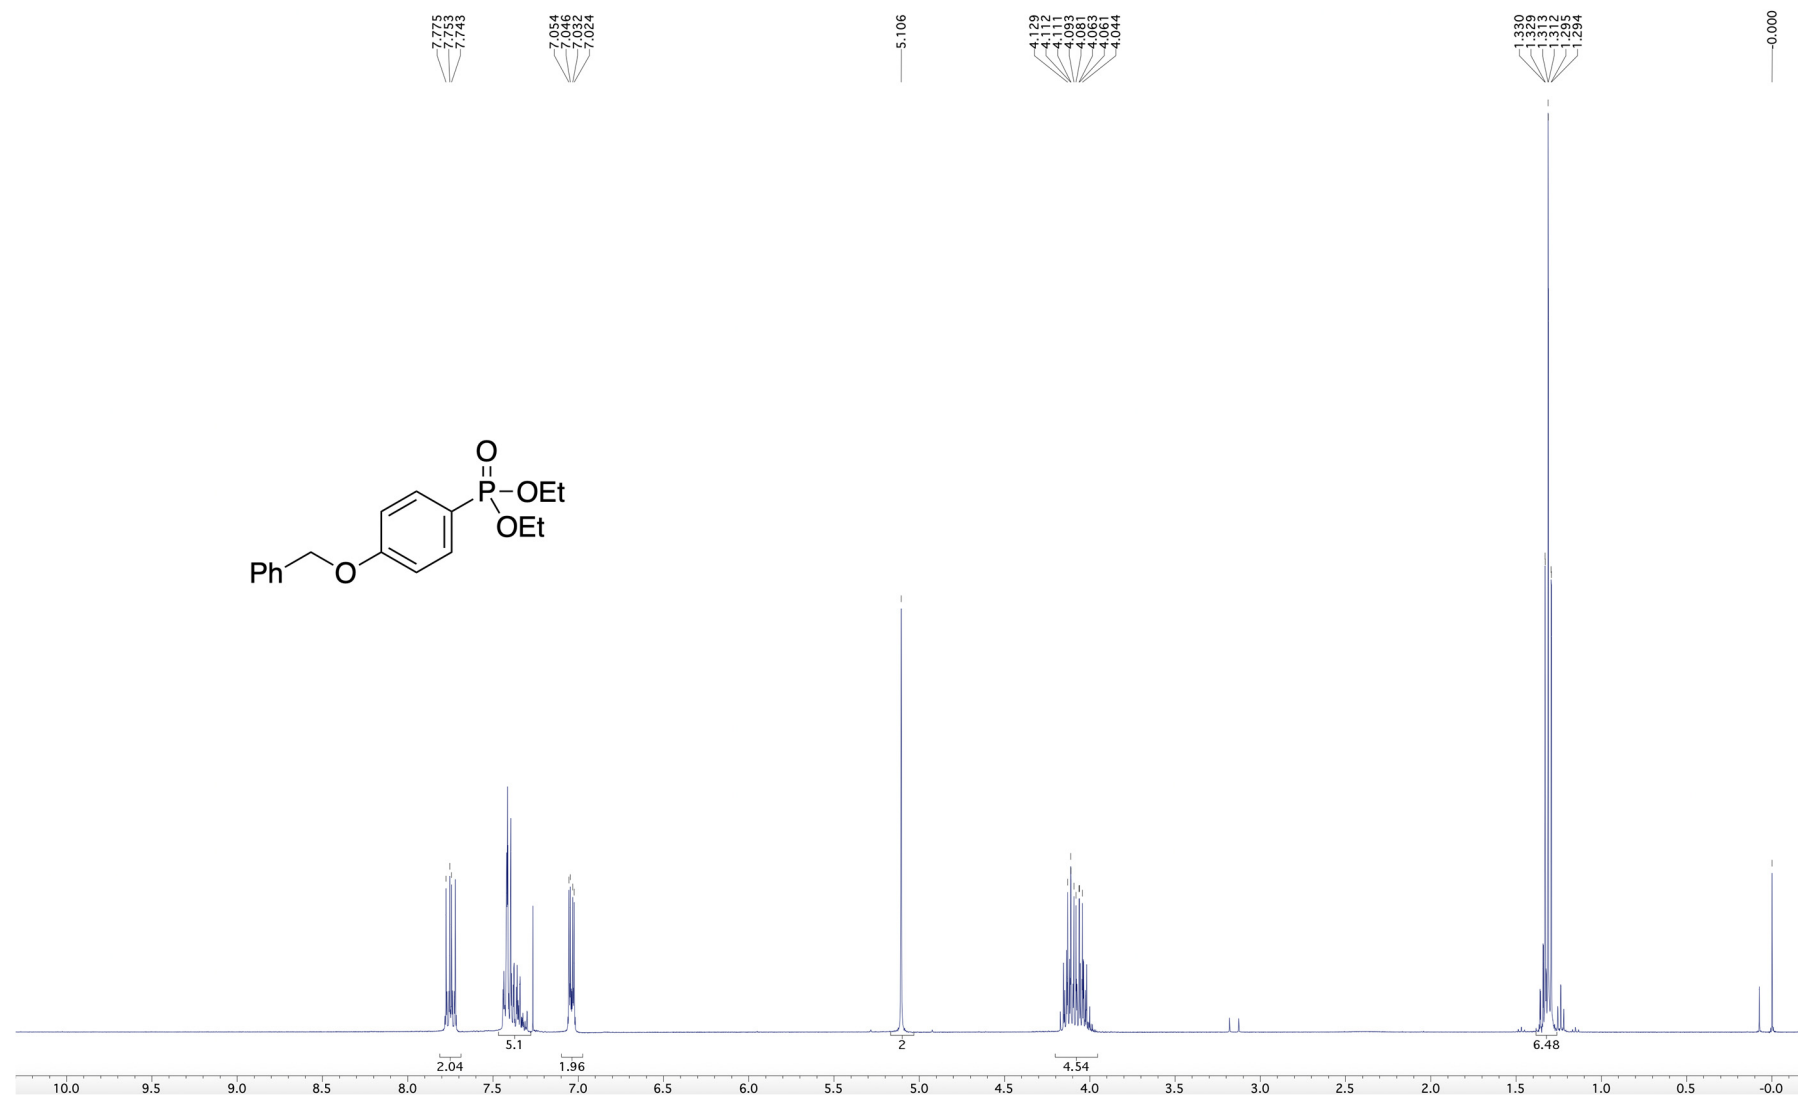

Figure S2. 162 MHz  $^{31}\text{P}$  NMR spectrum of **8**

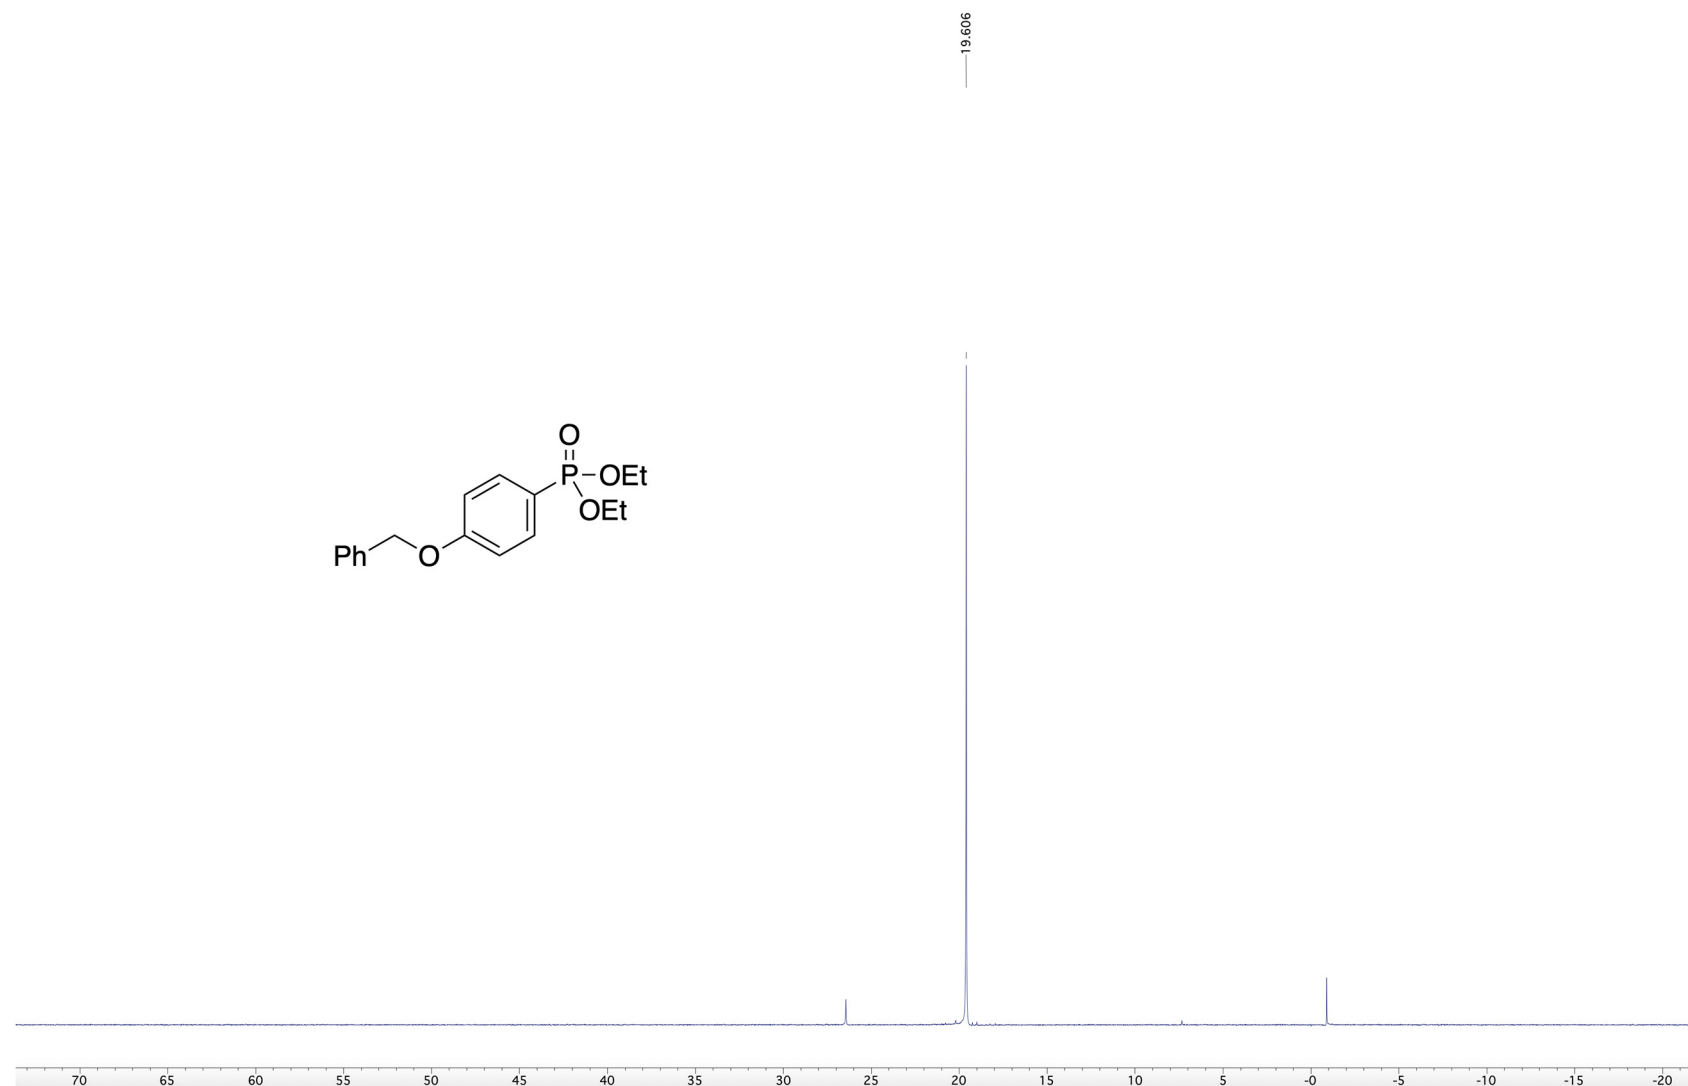



Figure S3. 100 MHz DEPTQ  $^{13}\text{C}$  NMR spectrum of **8**

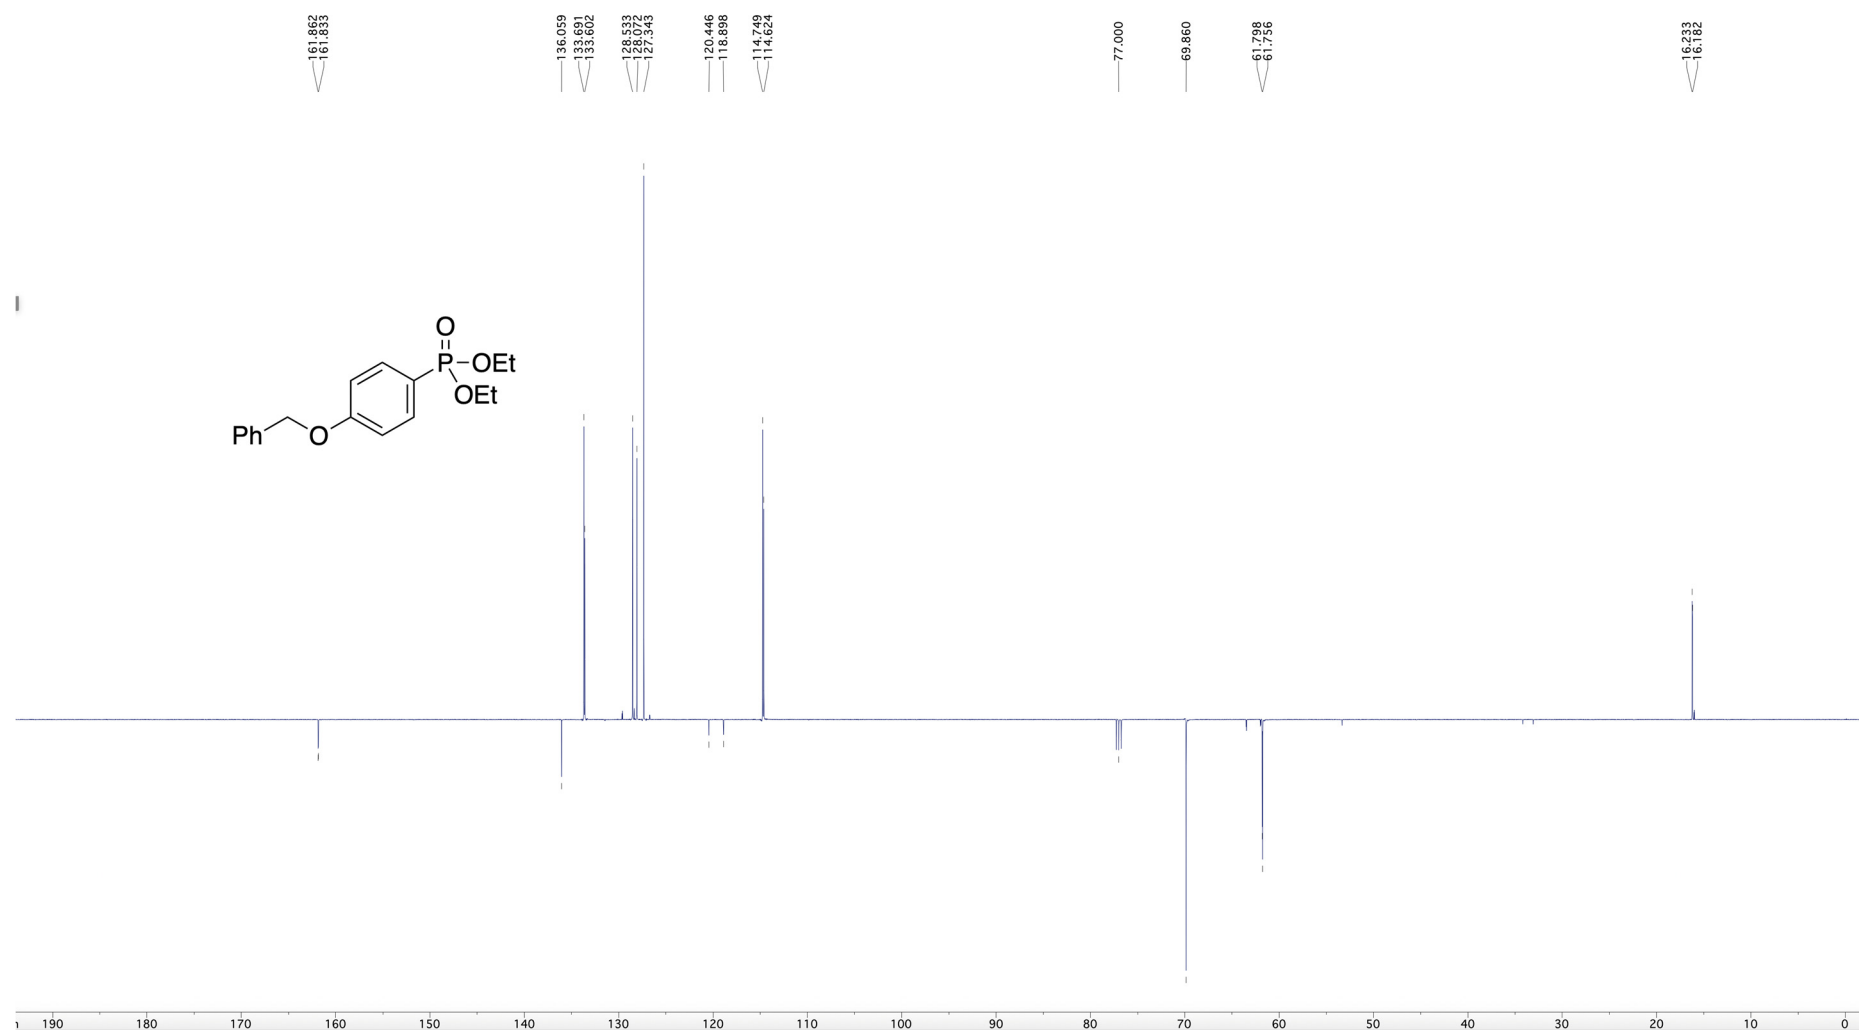

Figure S4. 400 MHz  $^1\text{H}$  NMR spectrum of **9**

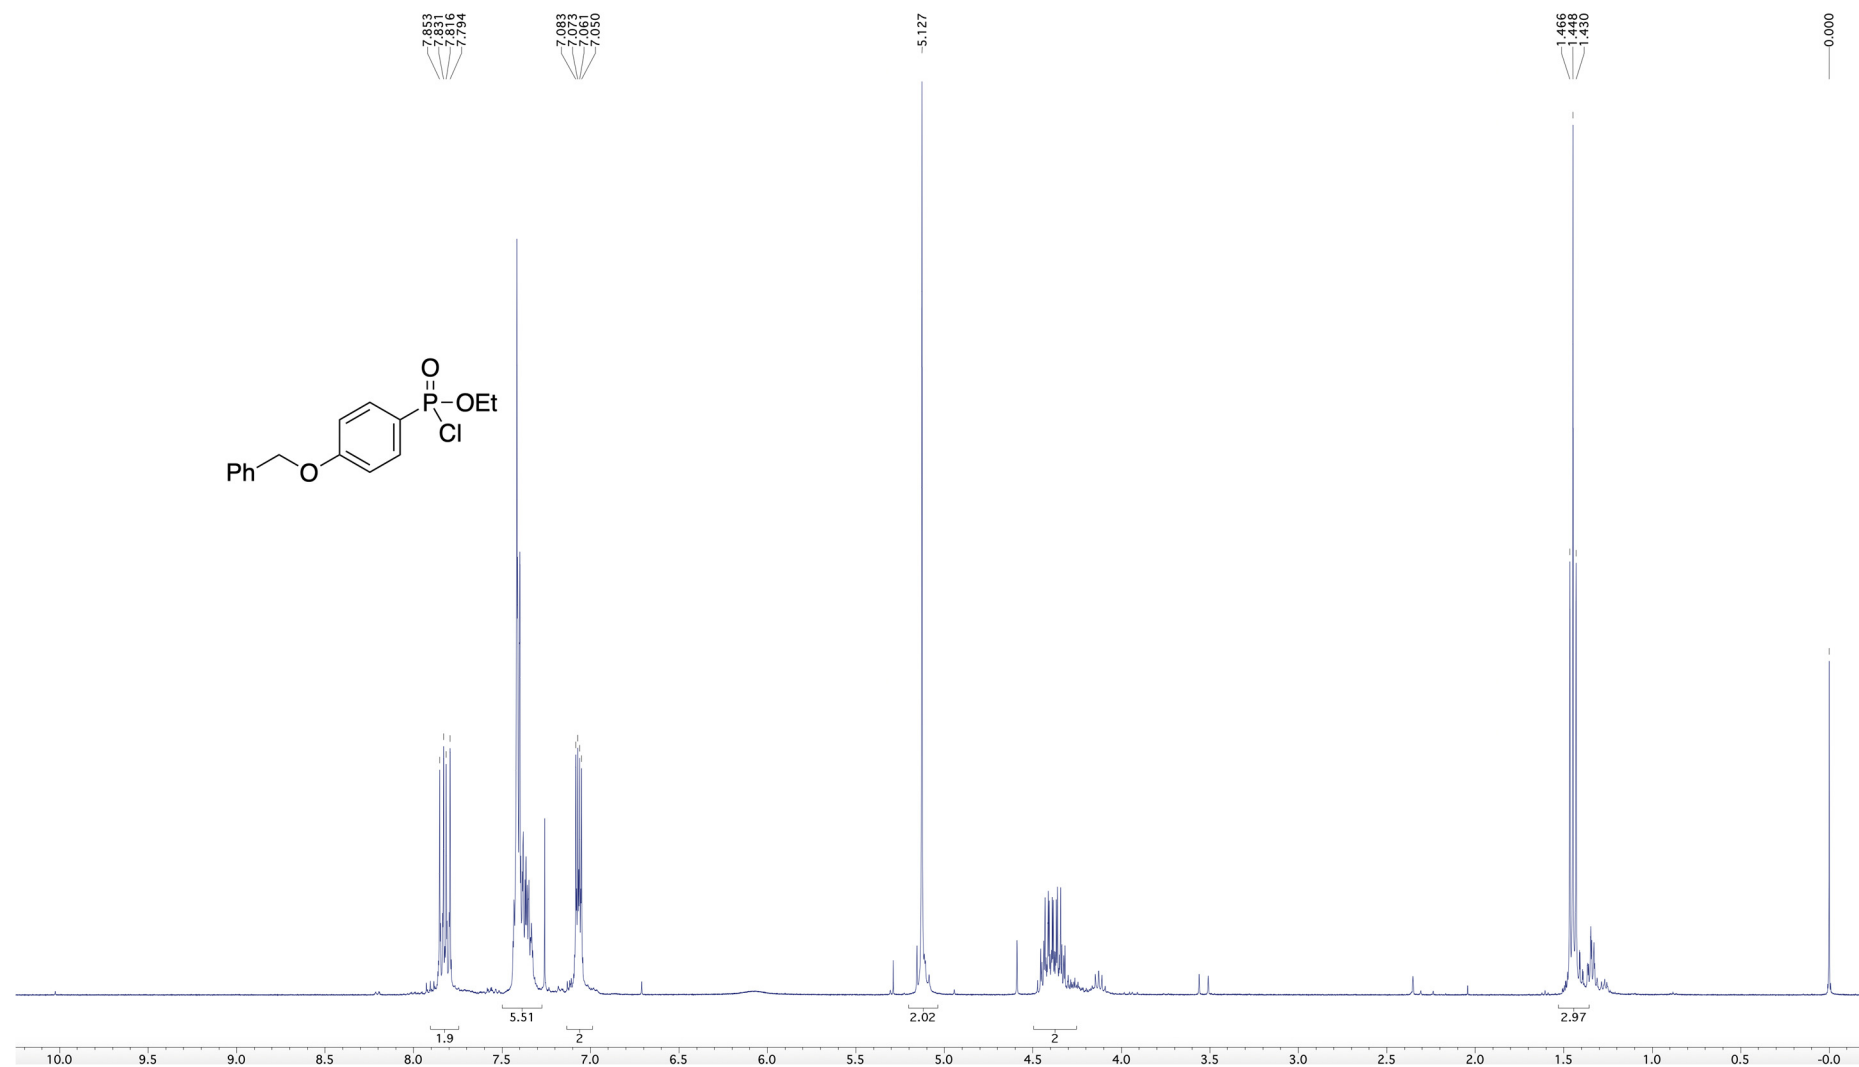

Figure S5. 162 MHz  $^{31}\text{P}$  NMR spectrum of **9**

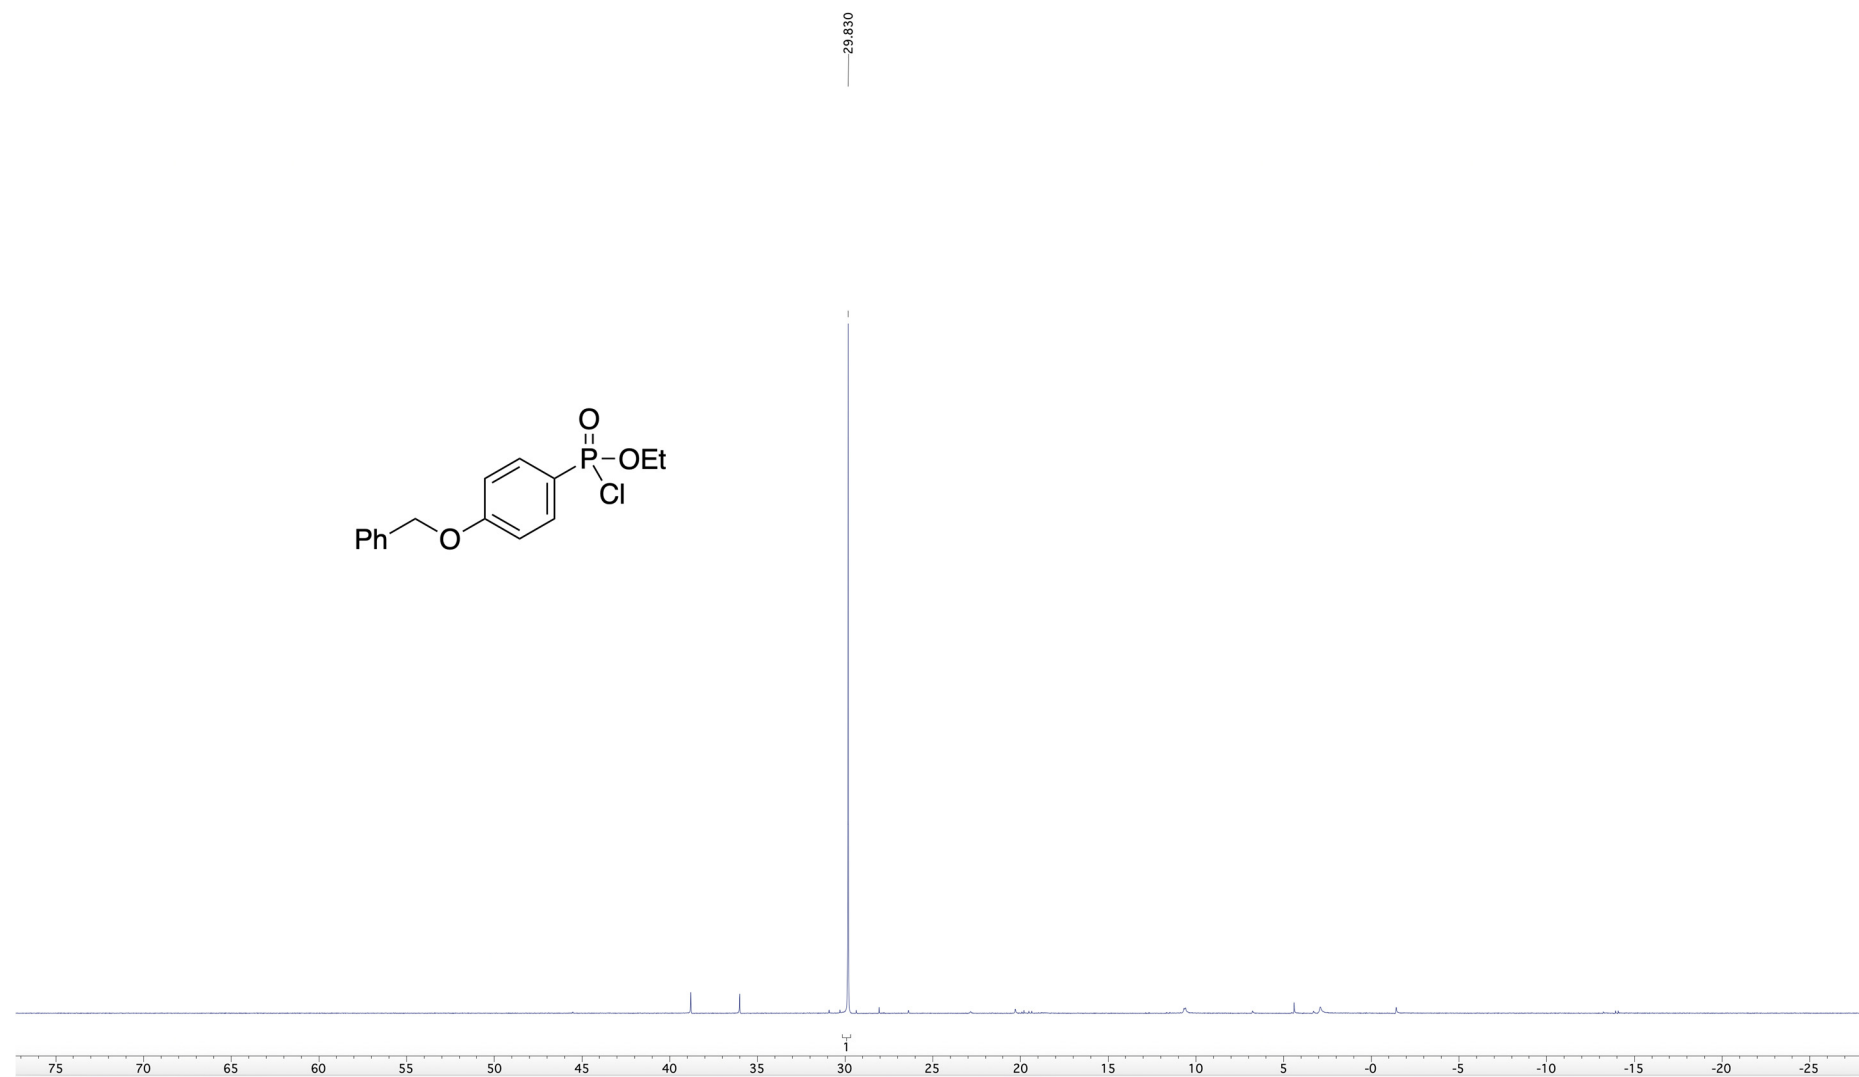

Figure S6. 100 MHz DEPTQ  $^{13}\text{C}$  NMR spectrum of **9**

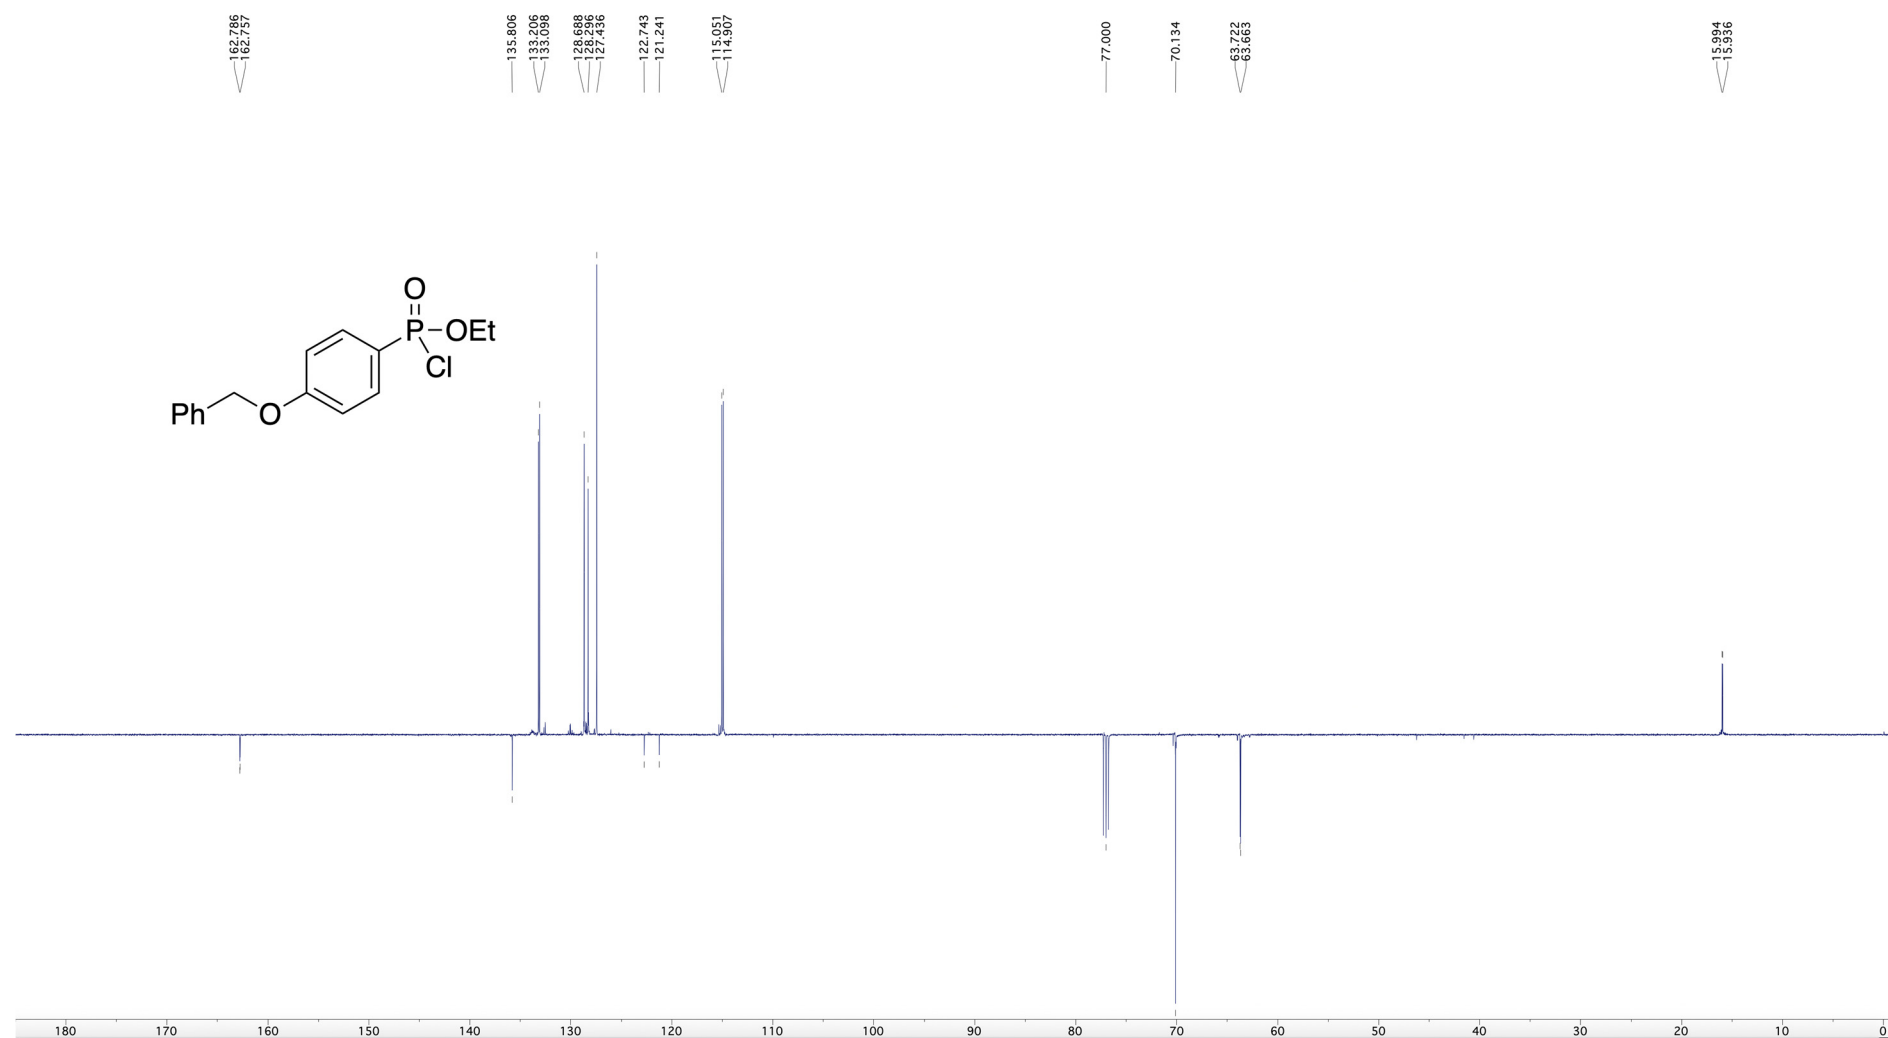

Figure S7. 400 MHz  $^1\text{H}$  NMR spectrum of **10**

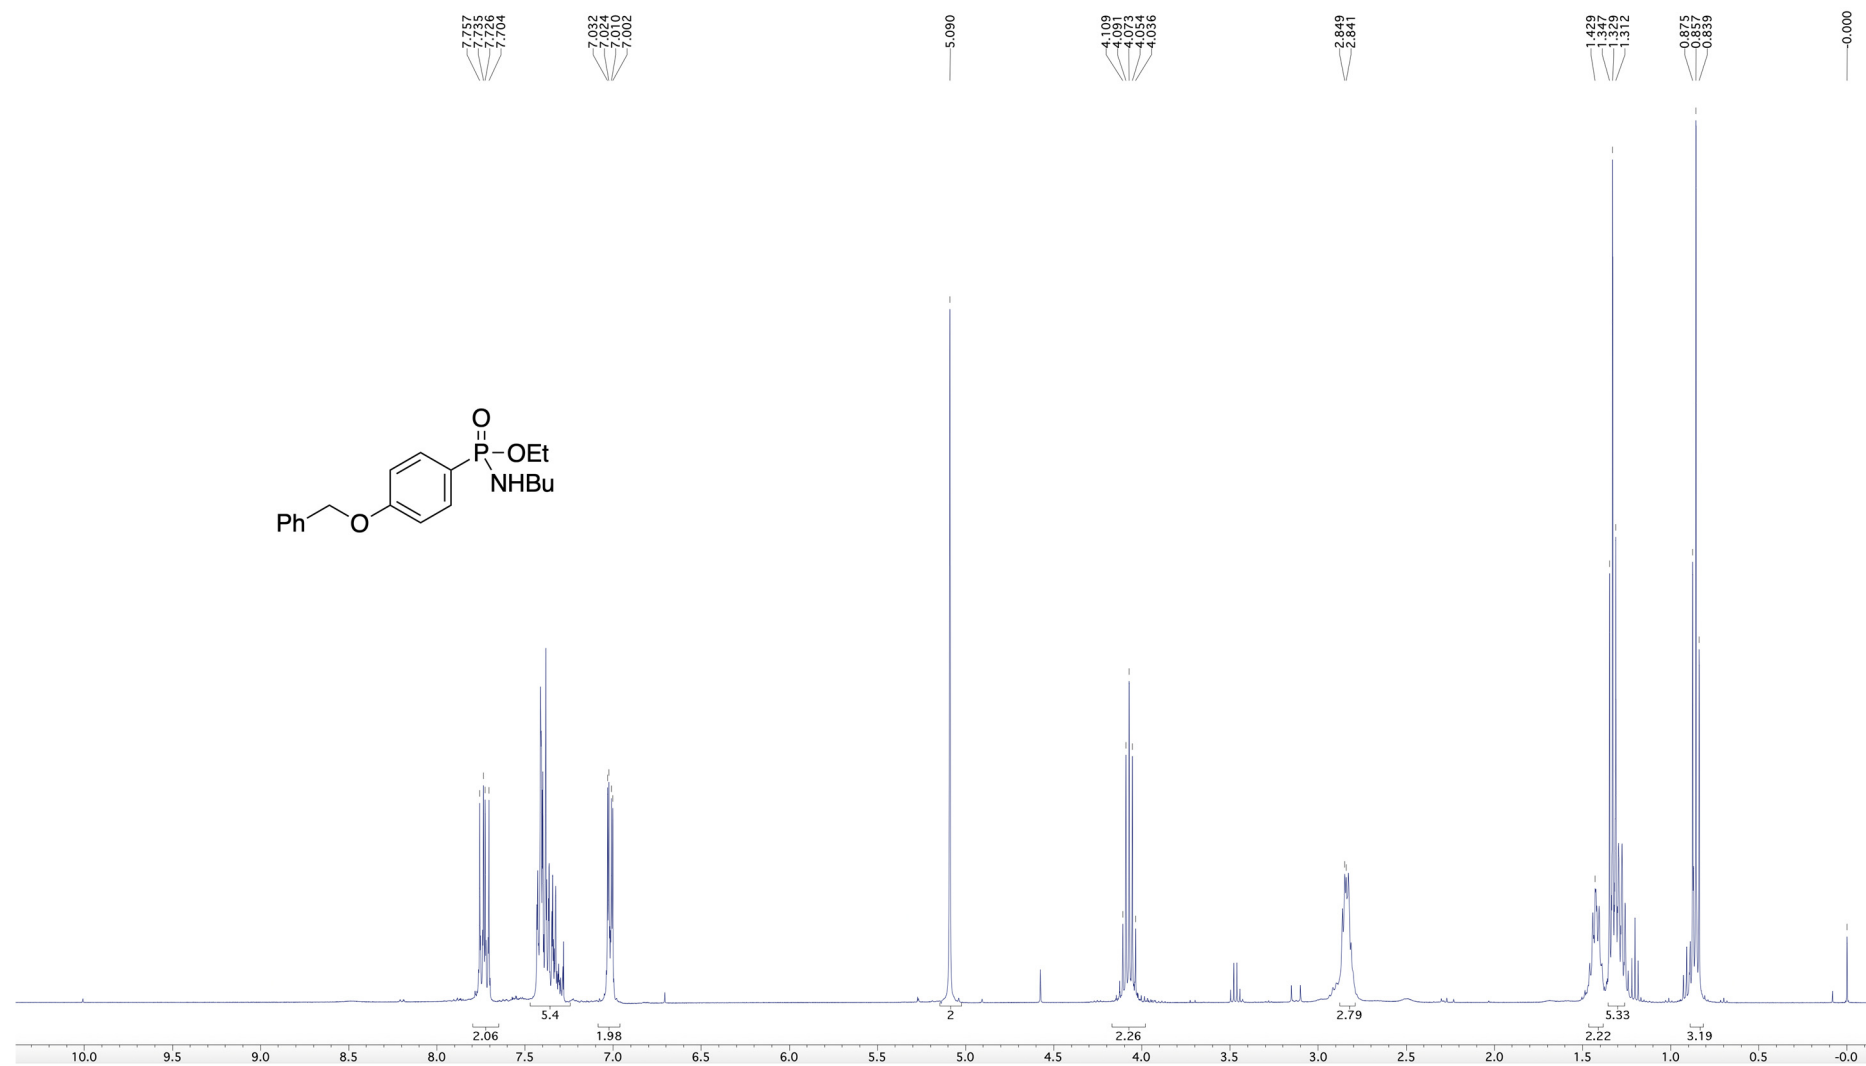

Figure S8. 162 MHz  $^{31}\text{P}$  NMR spectrum of **10**

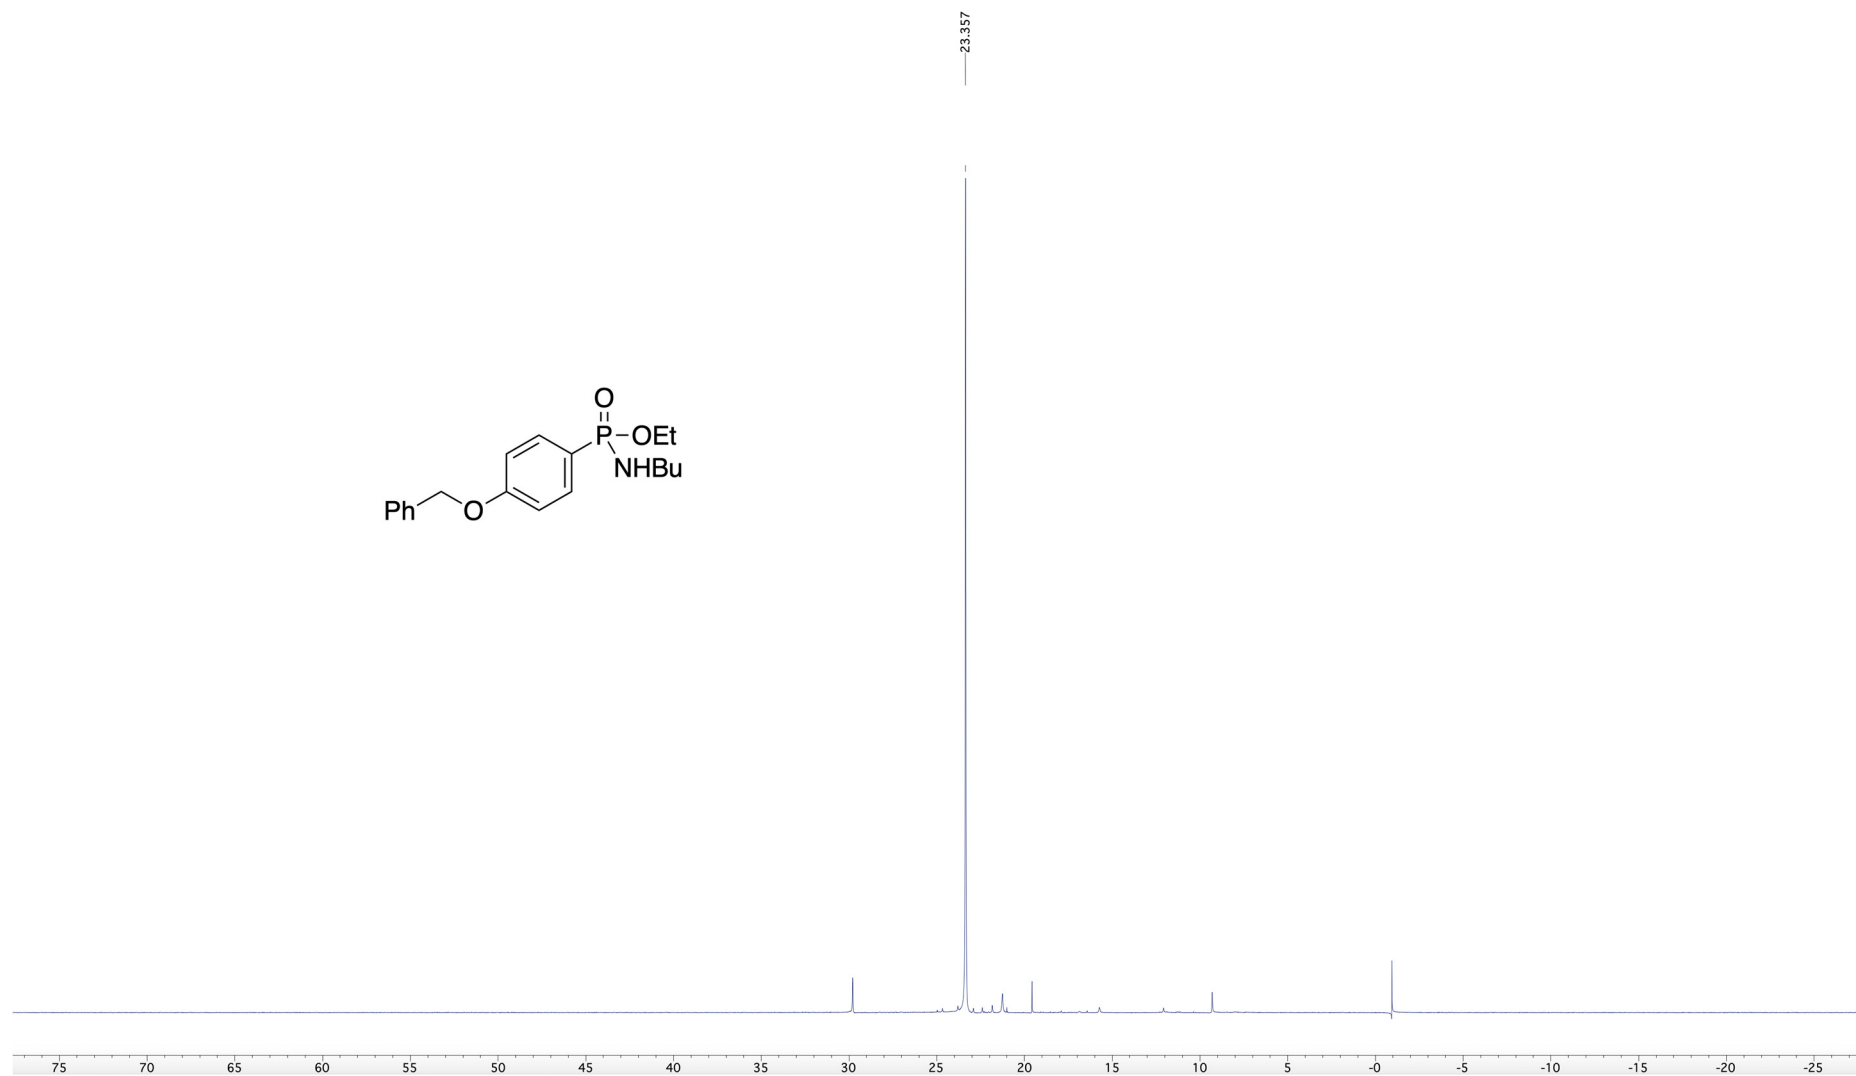

Figure S9. 100 MHz DEPTQ  $^{13}\text{C}$  NMR spectrum of **10**

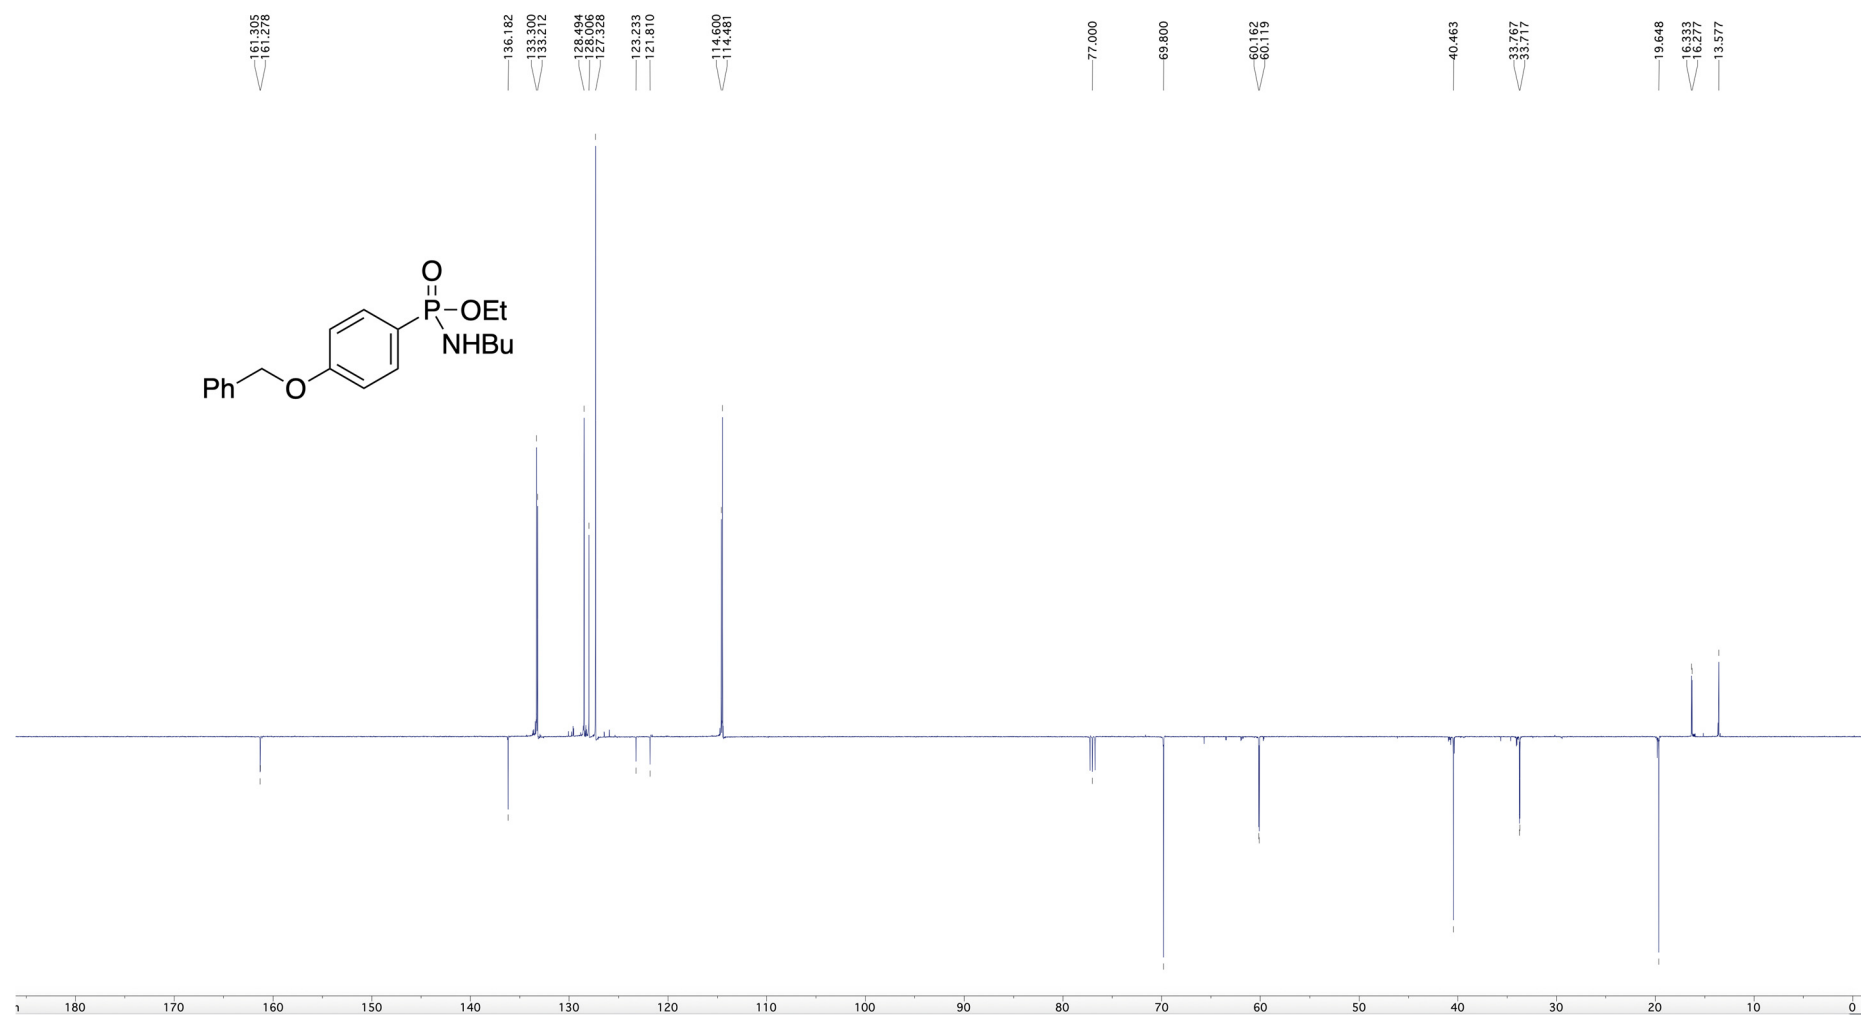

Figure S10. 400 MHz  $^1\text{H}$  NMR spectrum of **11**

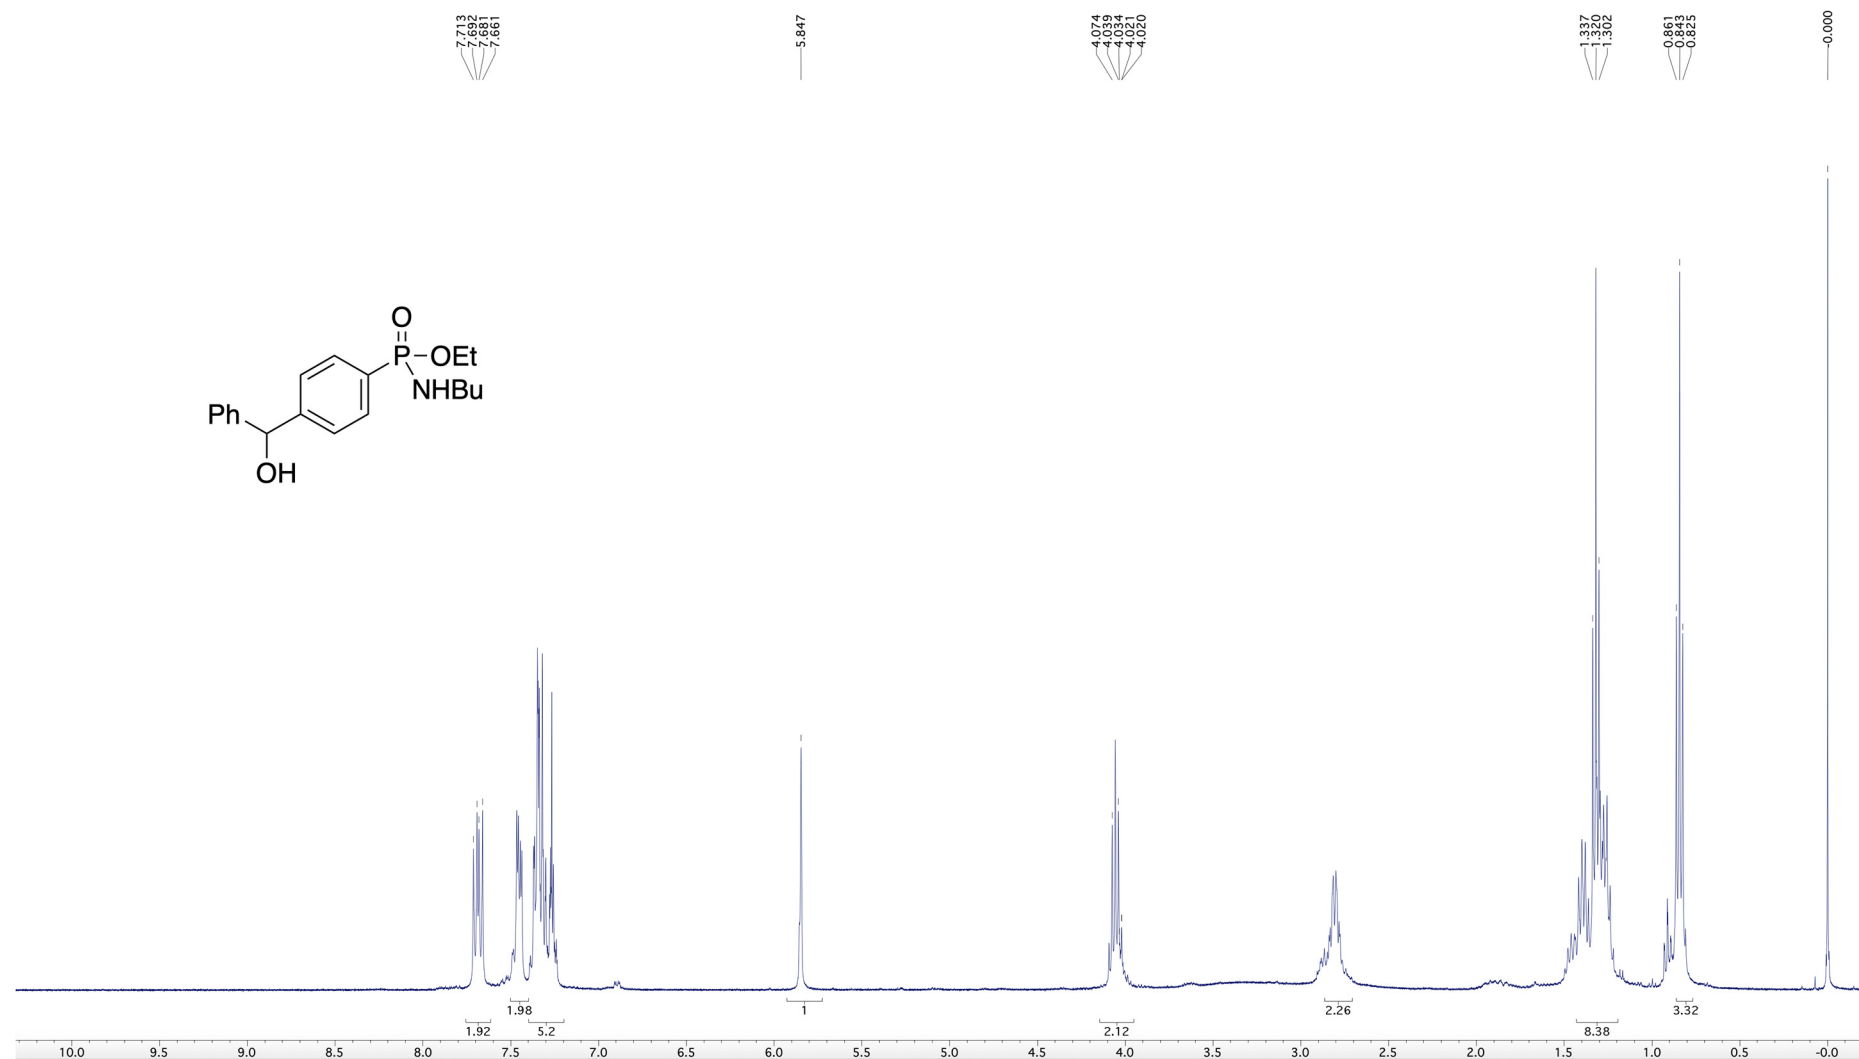



Figure S11. 162 MHz  $^{31}\text{P}$  NMR spectrum of **11**

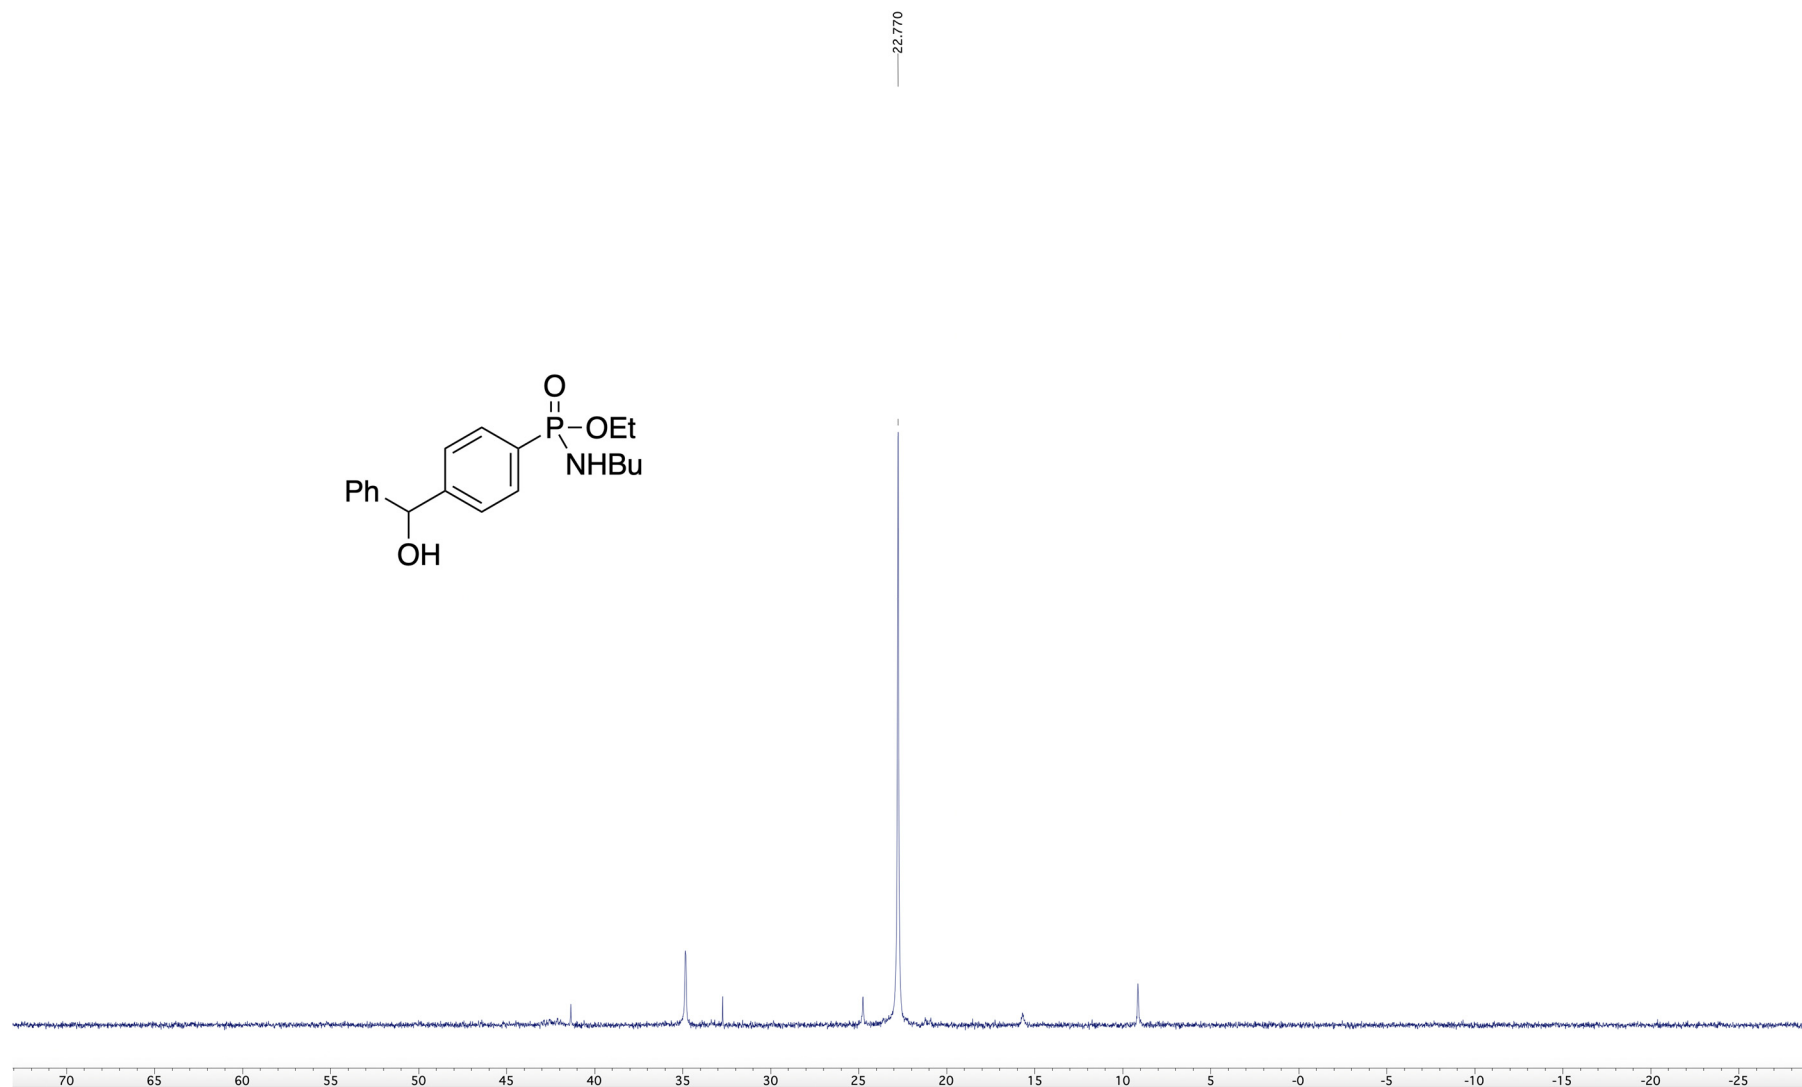

Figure S12. 100 MHz DEPTQ  $^{13}\text{C}$  NMR spectrum of **11**

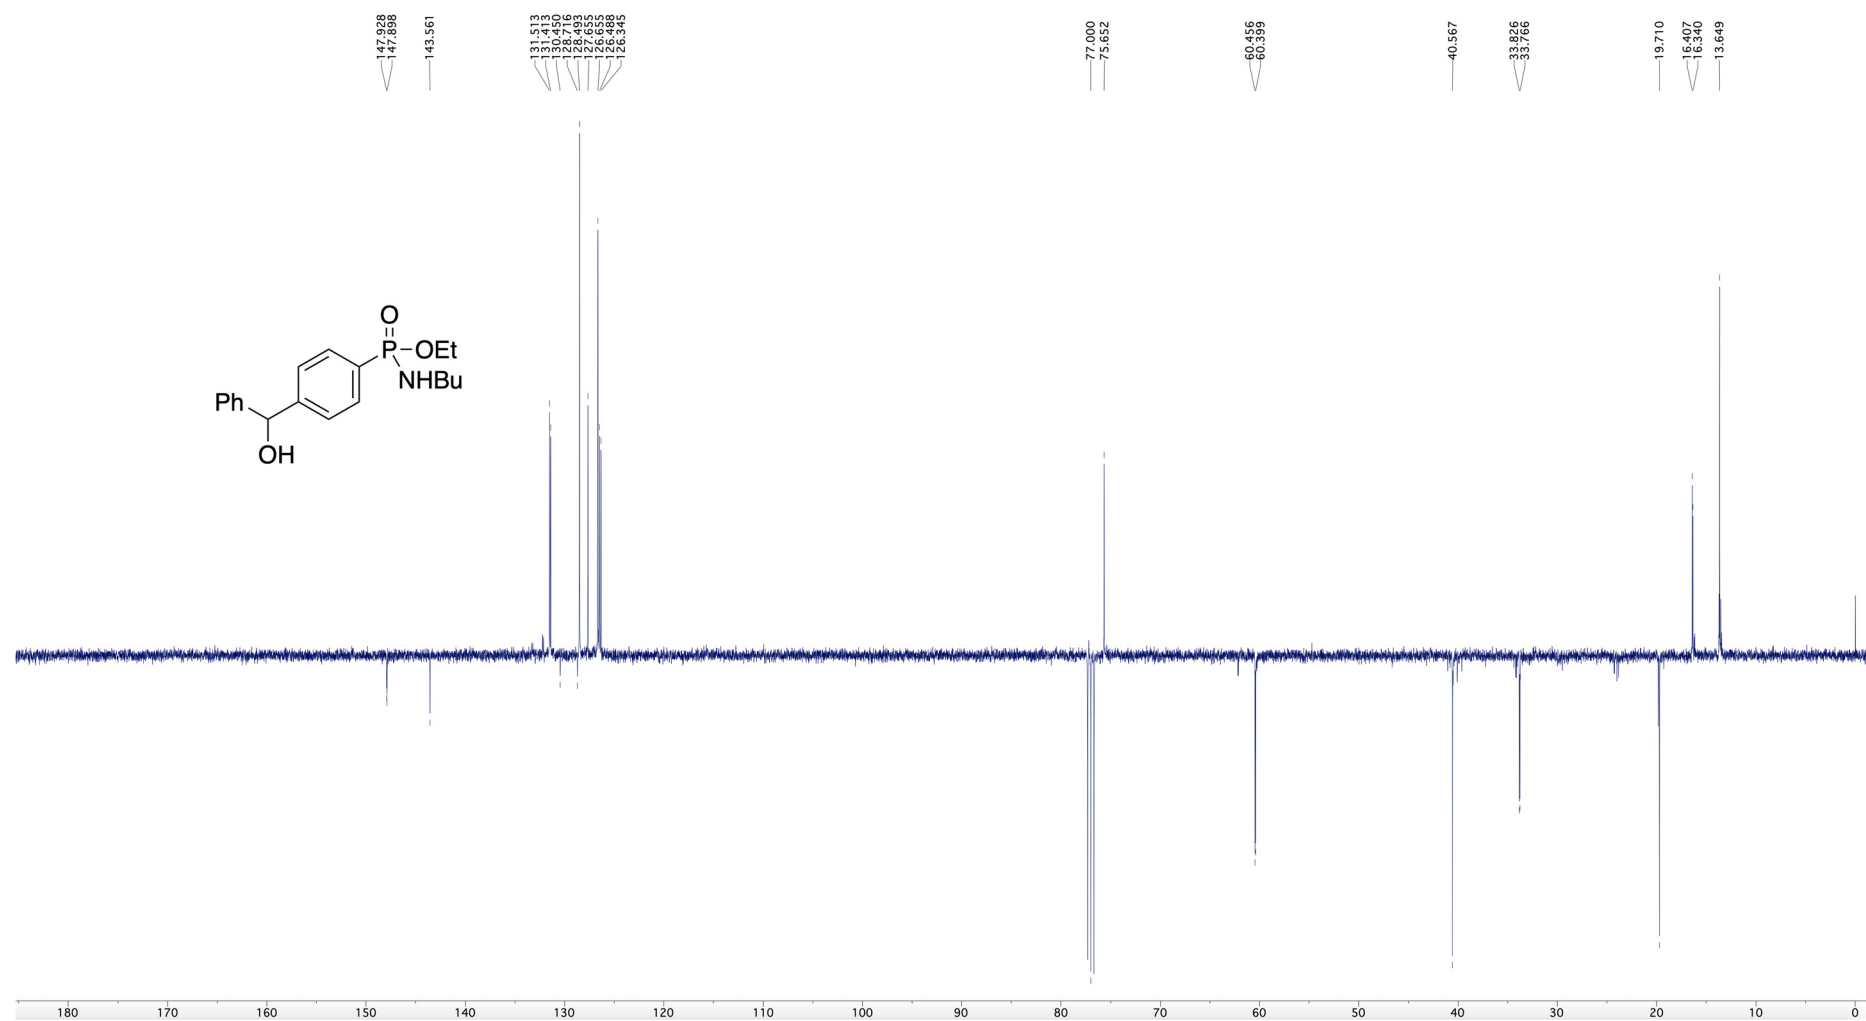

Figure S13. 400 MHz  $^1\text{H}$  NMR spectrum of **12**

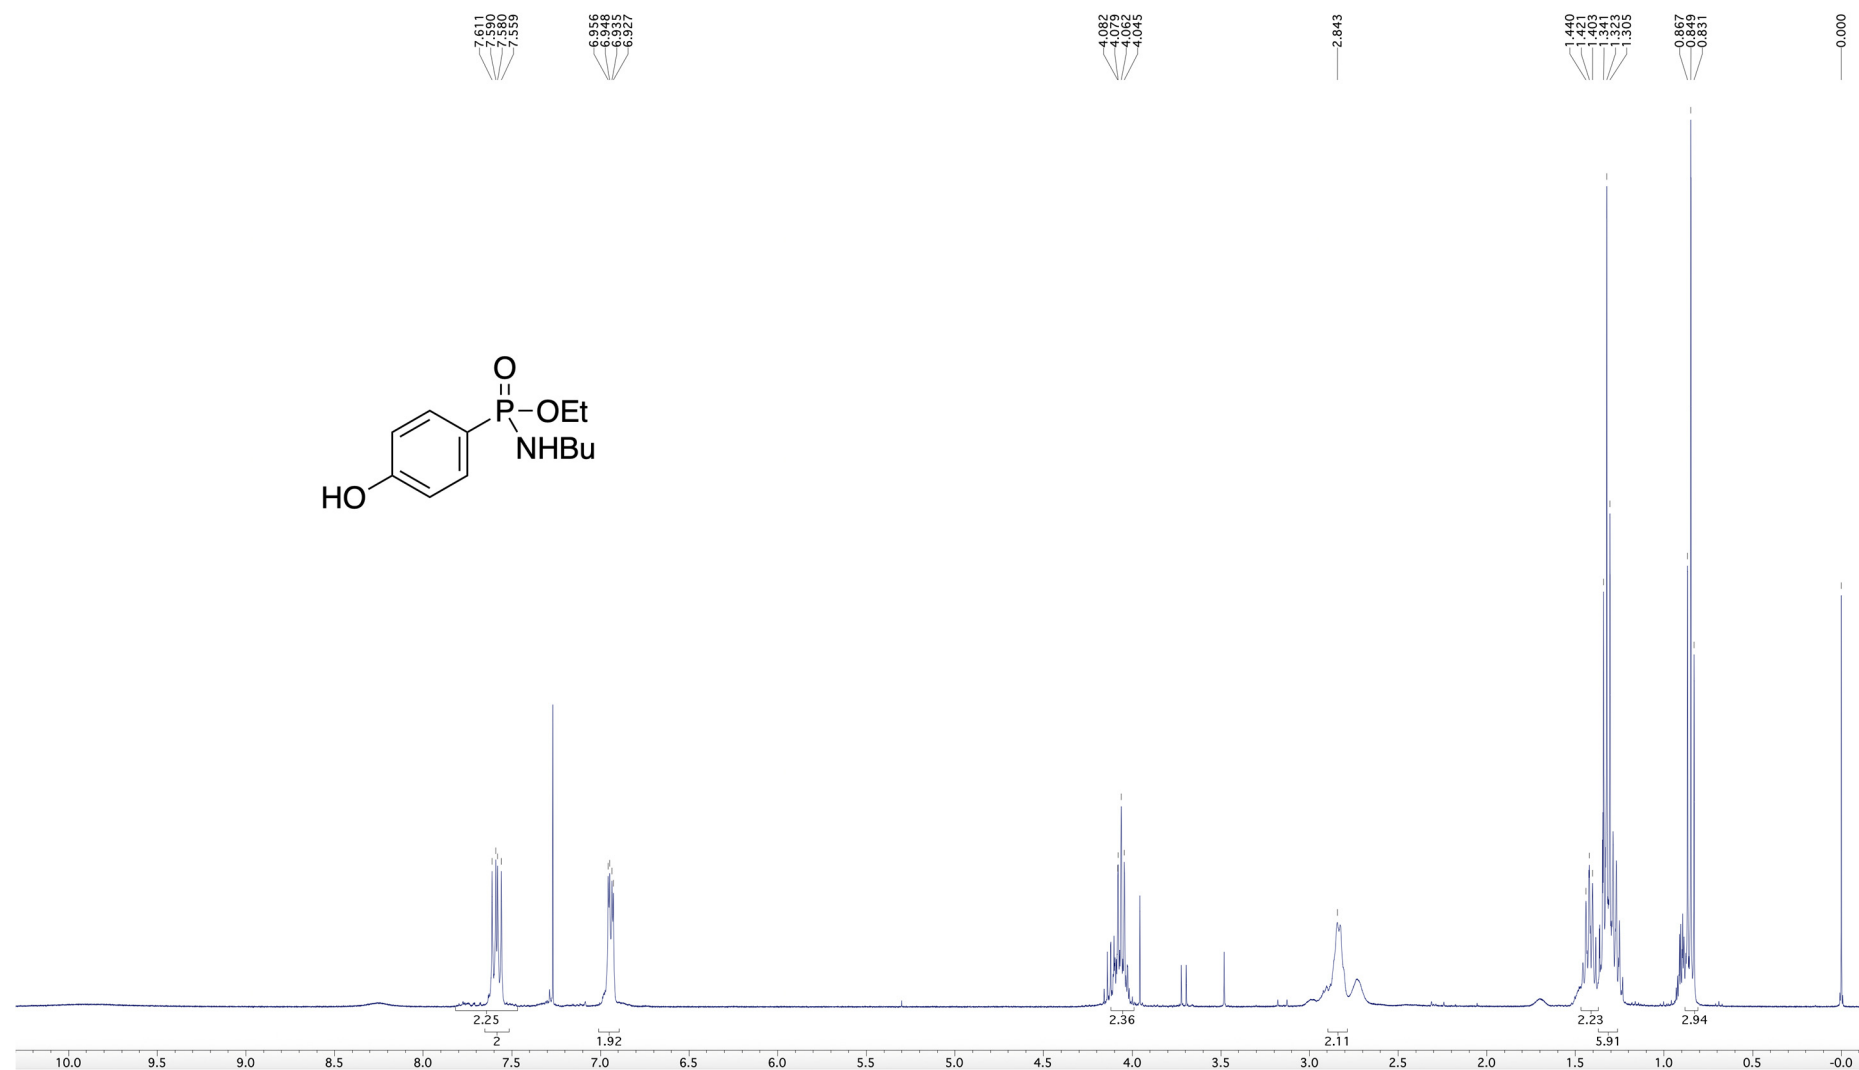

Figure S14. 202 MHz  $^{31}\text{P}$  NMR spectrum of **12**

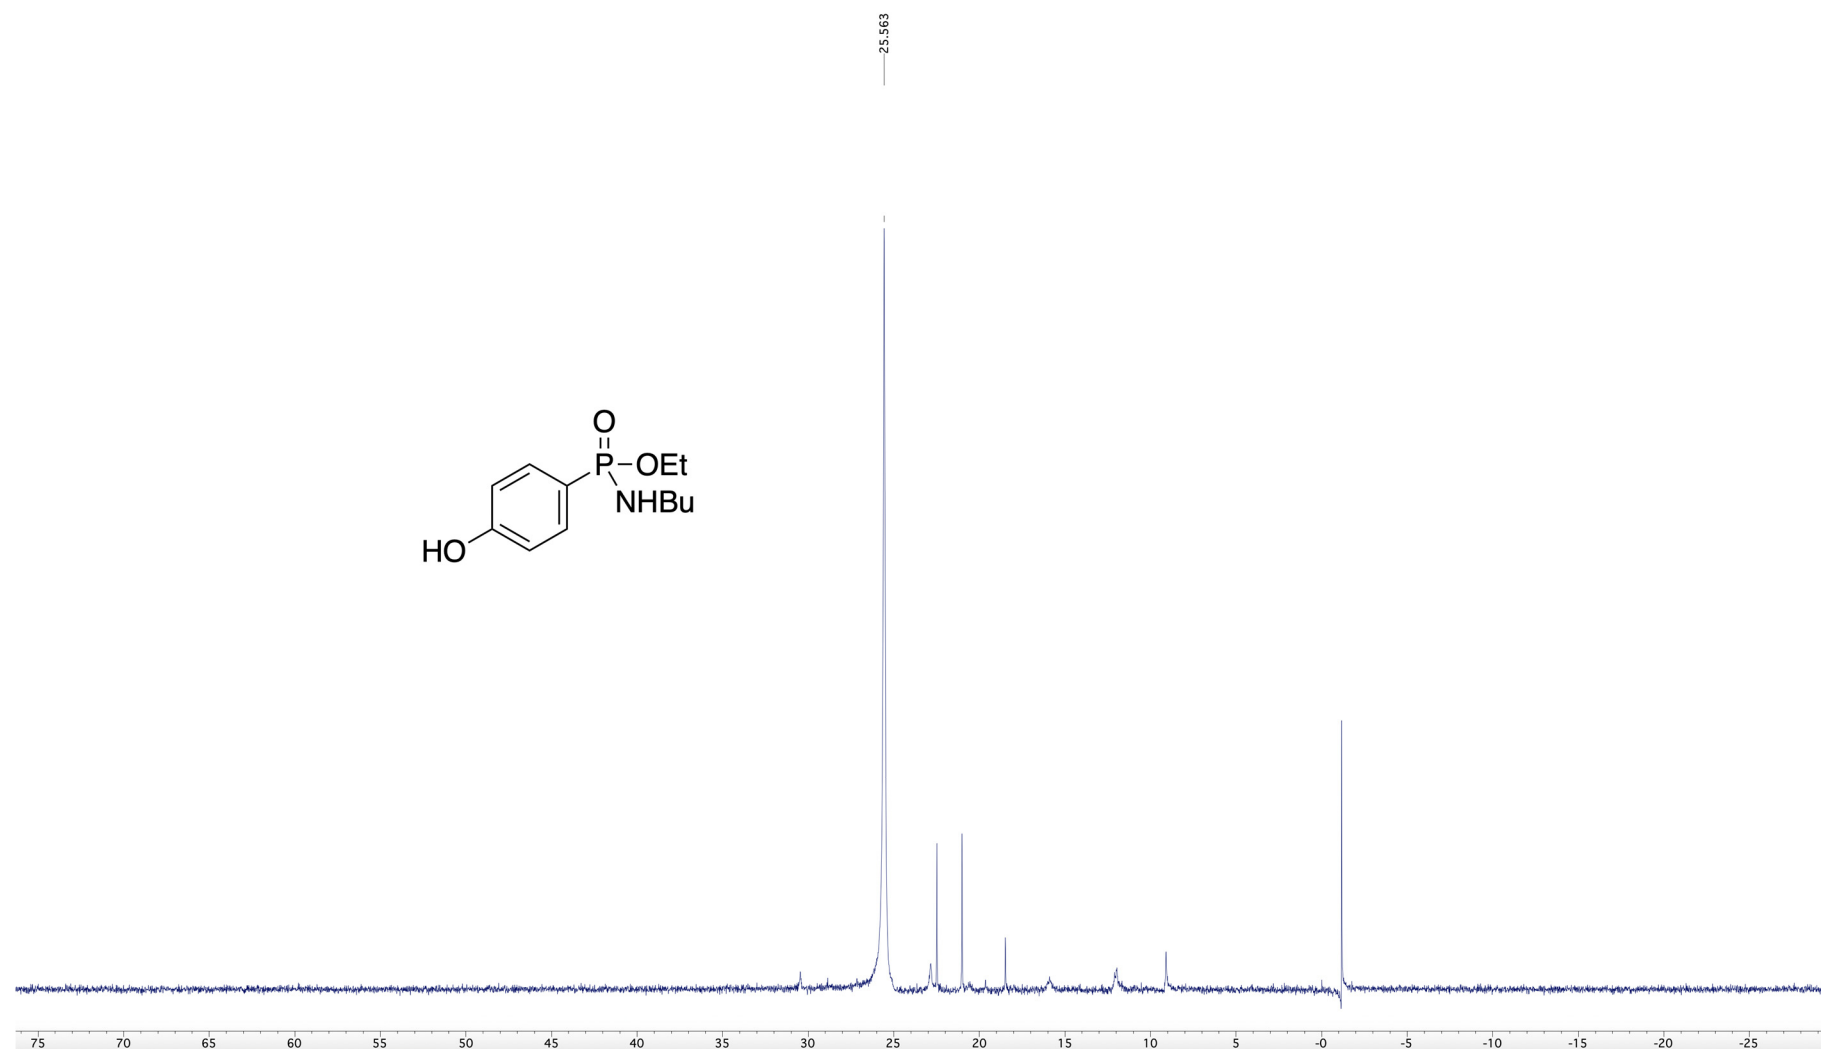

Figure S15. 100 MHz DEPTQ  $^{13}\text{C}$  NMR spectrum of **12**

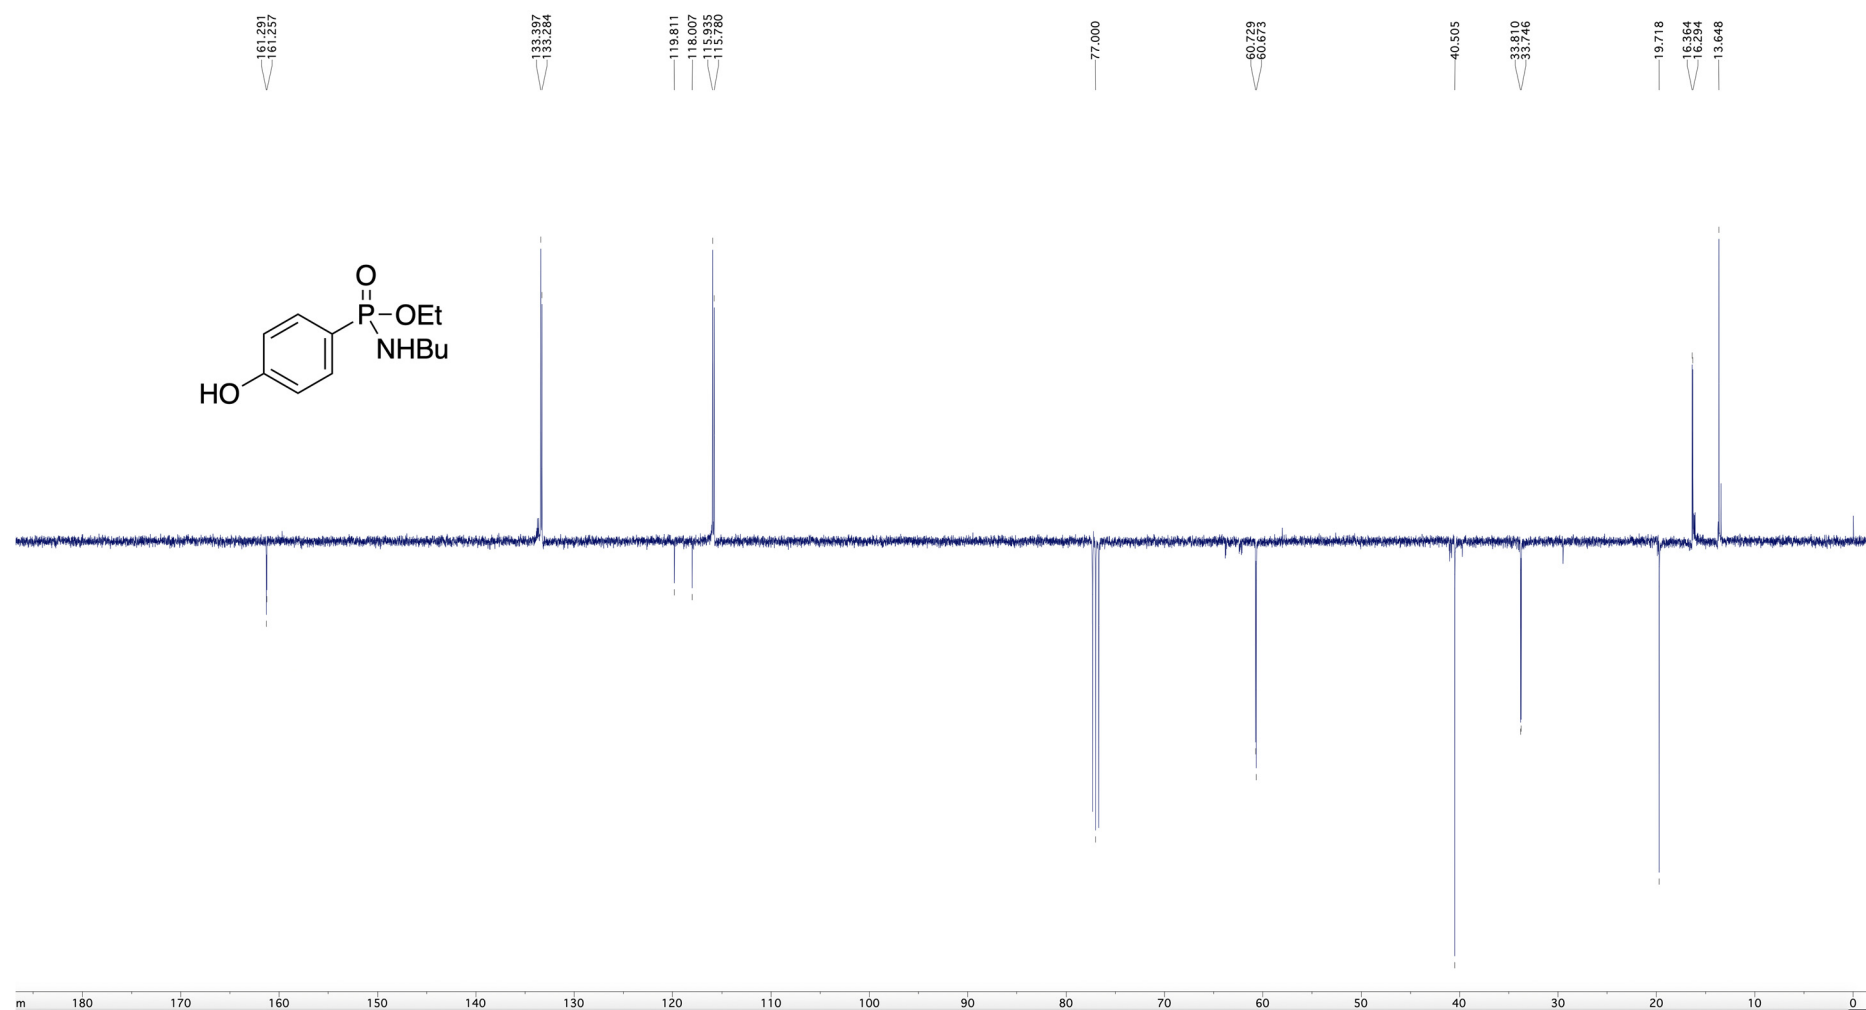

Figure S16. 400 MHz  $^1\text{H}$  NMR spectrum of **13a**

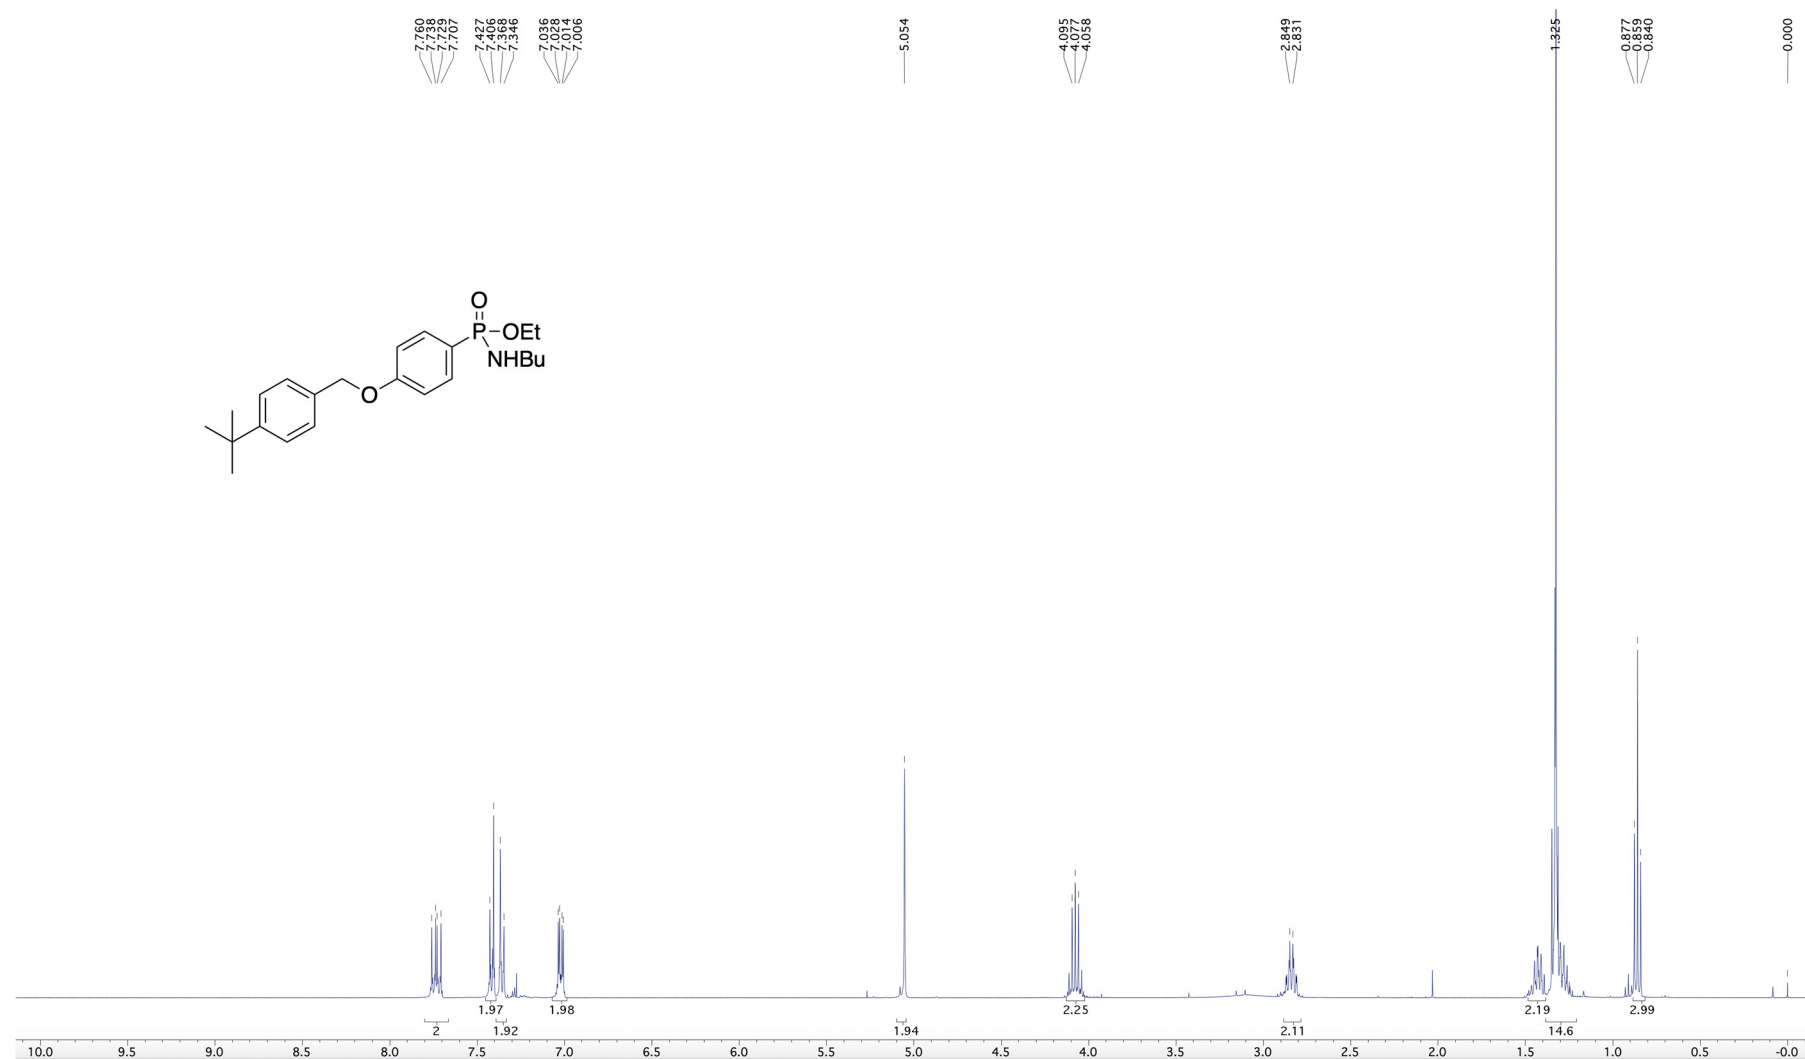

Figure S17. 162 MHz  $^{31}\text{P}$  NMR spectrum of **13a**

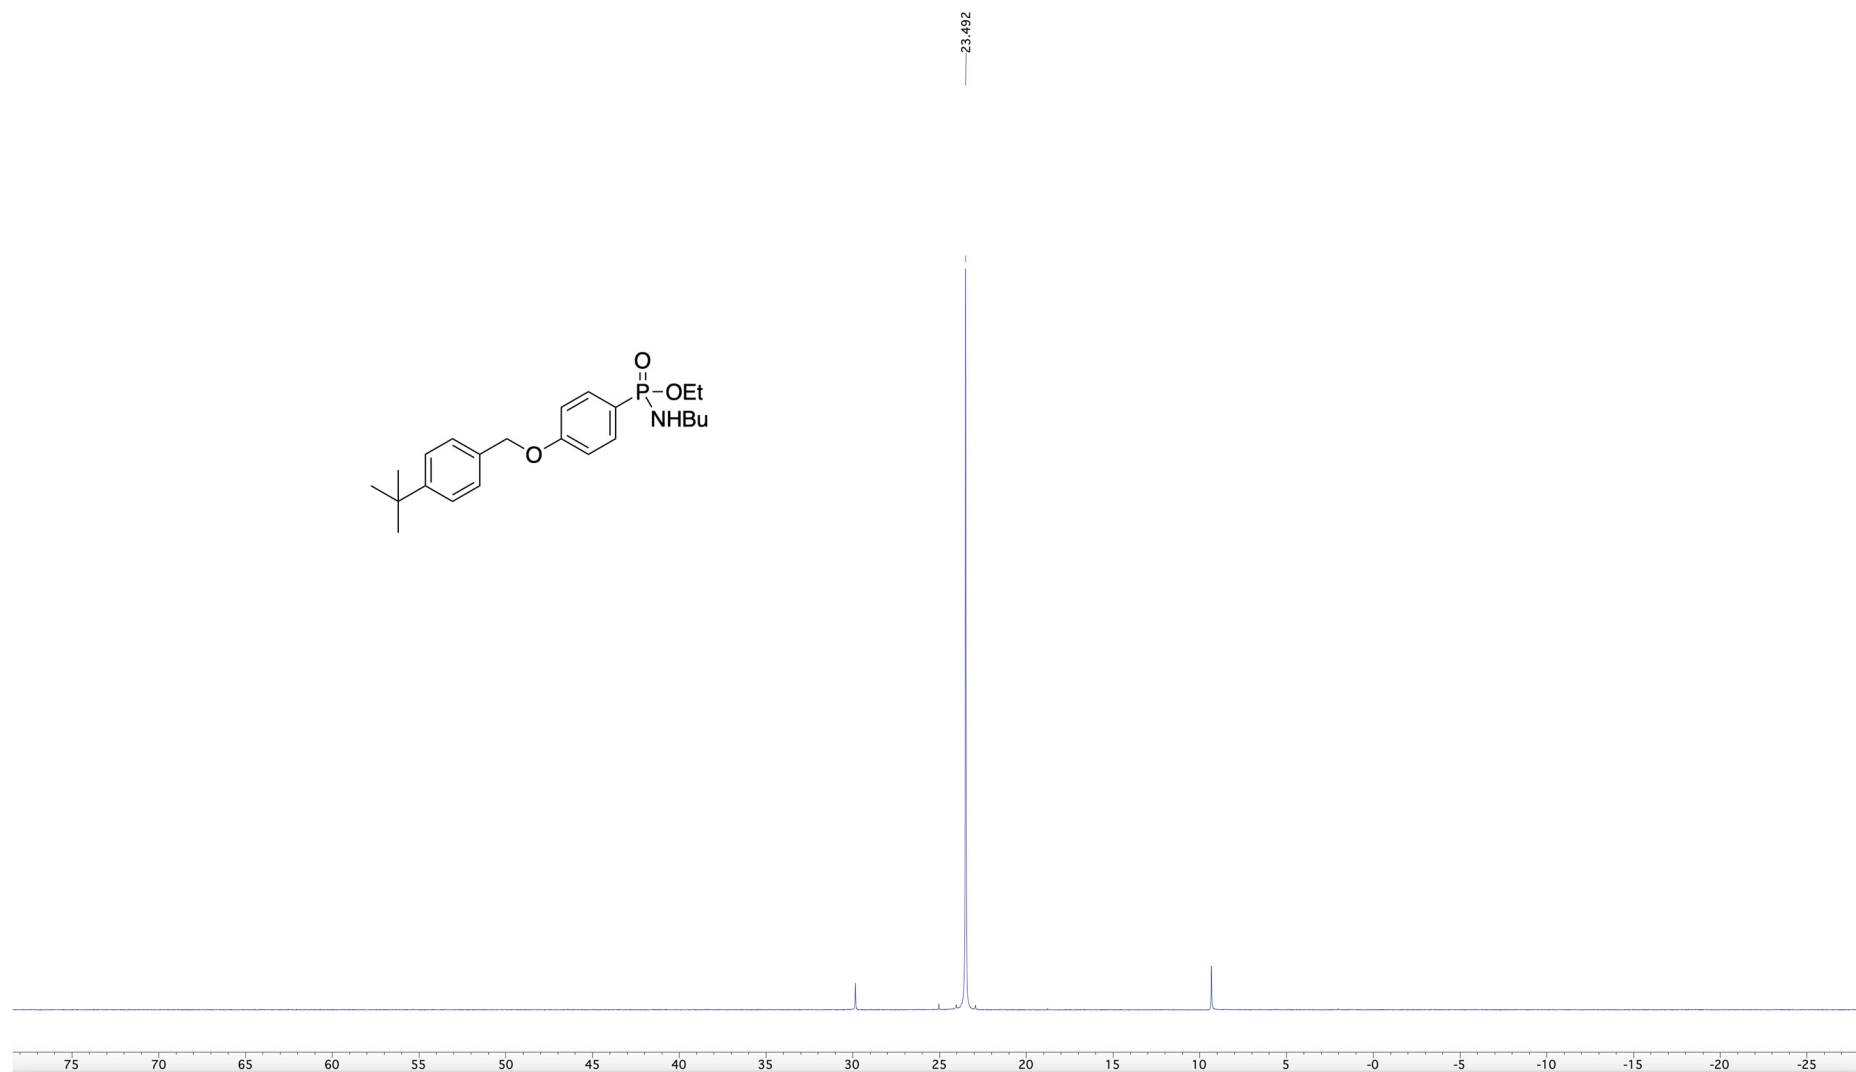

Figure S18. 100 MHz DEPTQ  $^{13}\text{C}$  NMR spectrum of **13a**

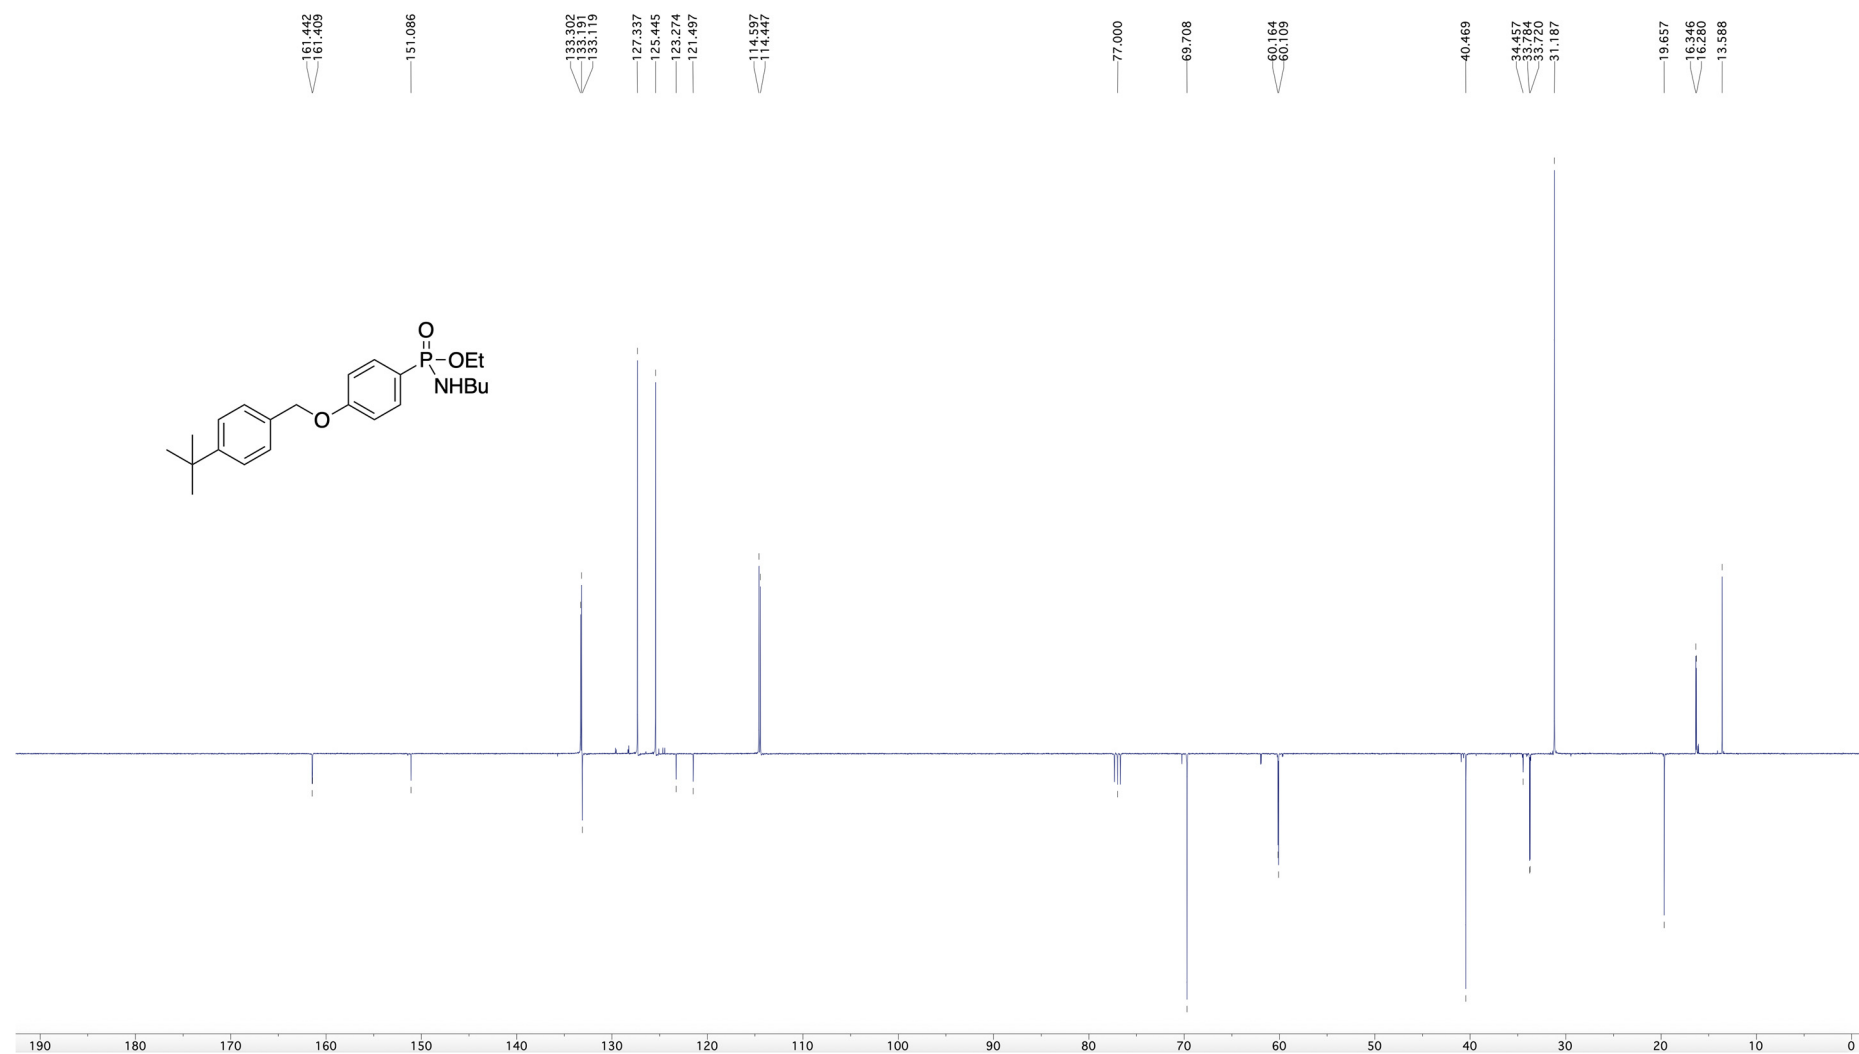



Figure S19. 400 MHz  $^1\text{H}$  NMR spectrum of **13b**

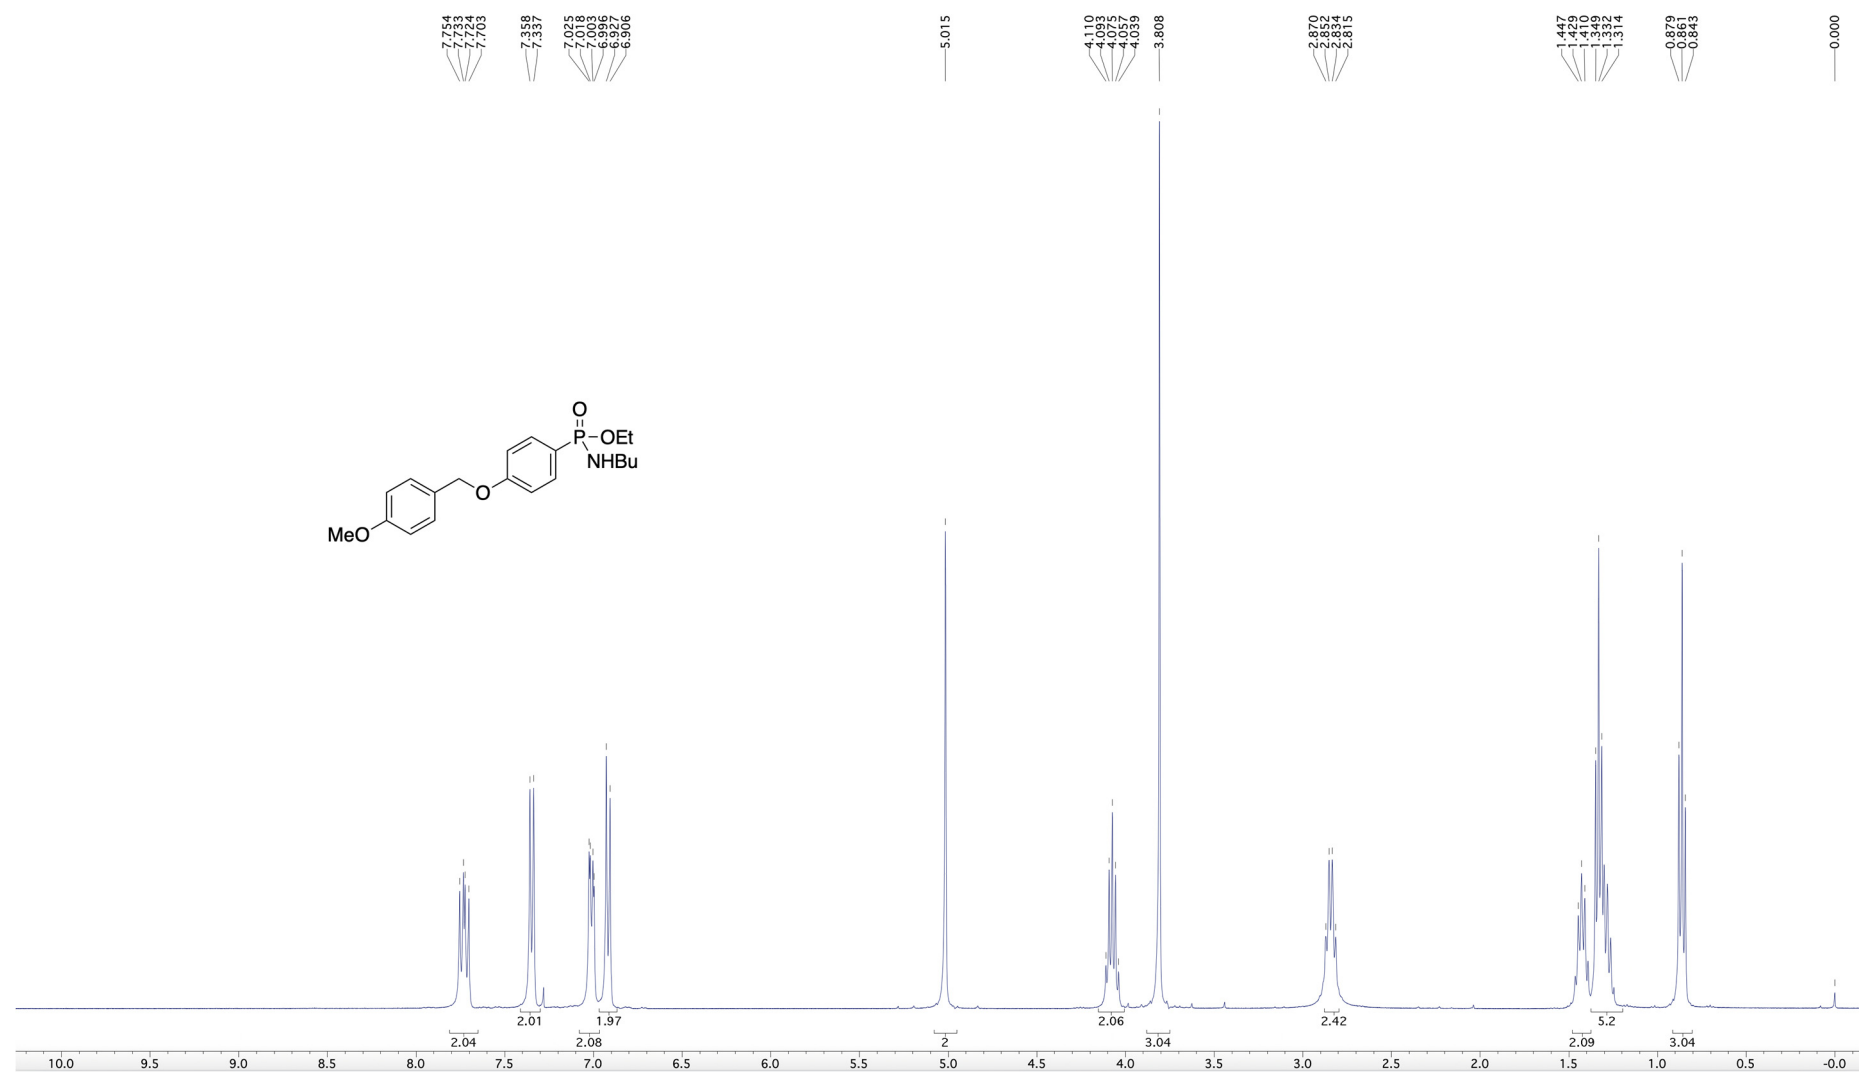

Figure S20. 162 MHz  $^{31}\text{P}$  NMR spectrum of **13b**

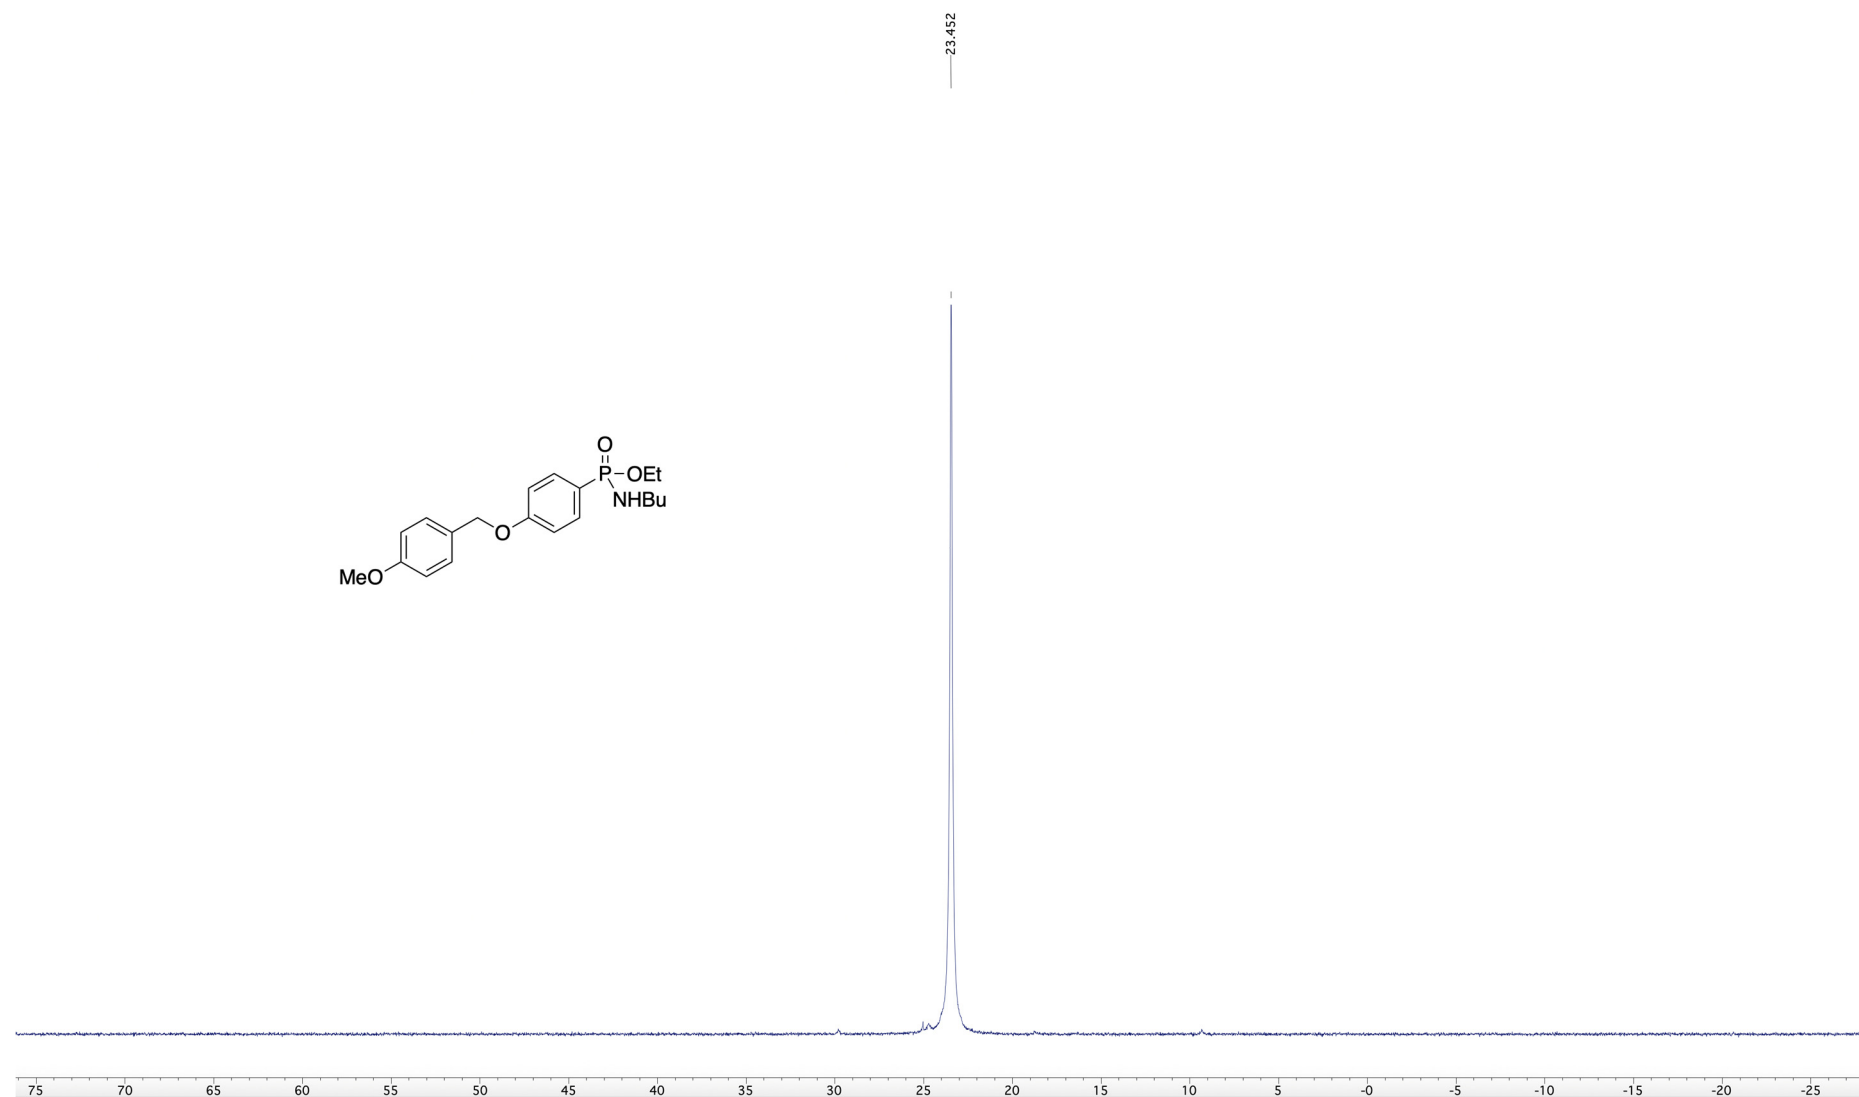

Figure S21. 125 MHz DEPTQ  $^{13}\text{C}$  NMR spectrum of **13b**

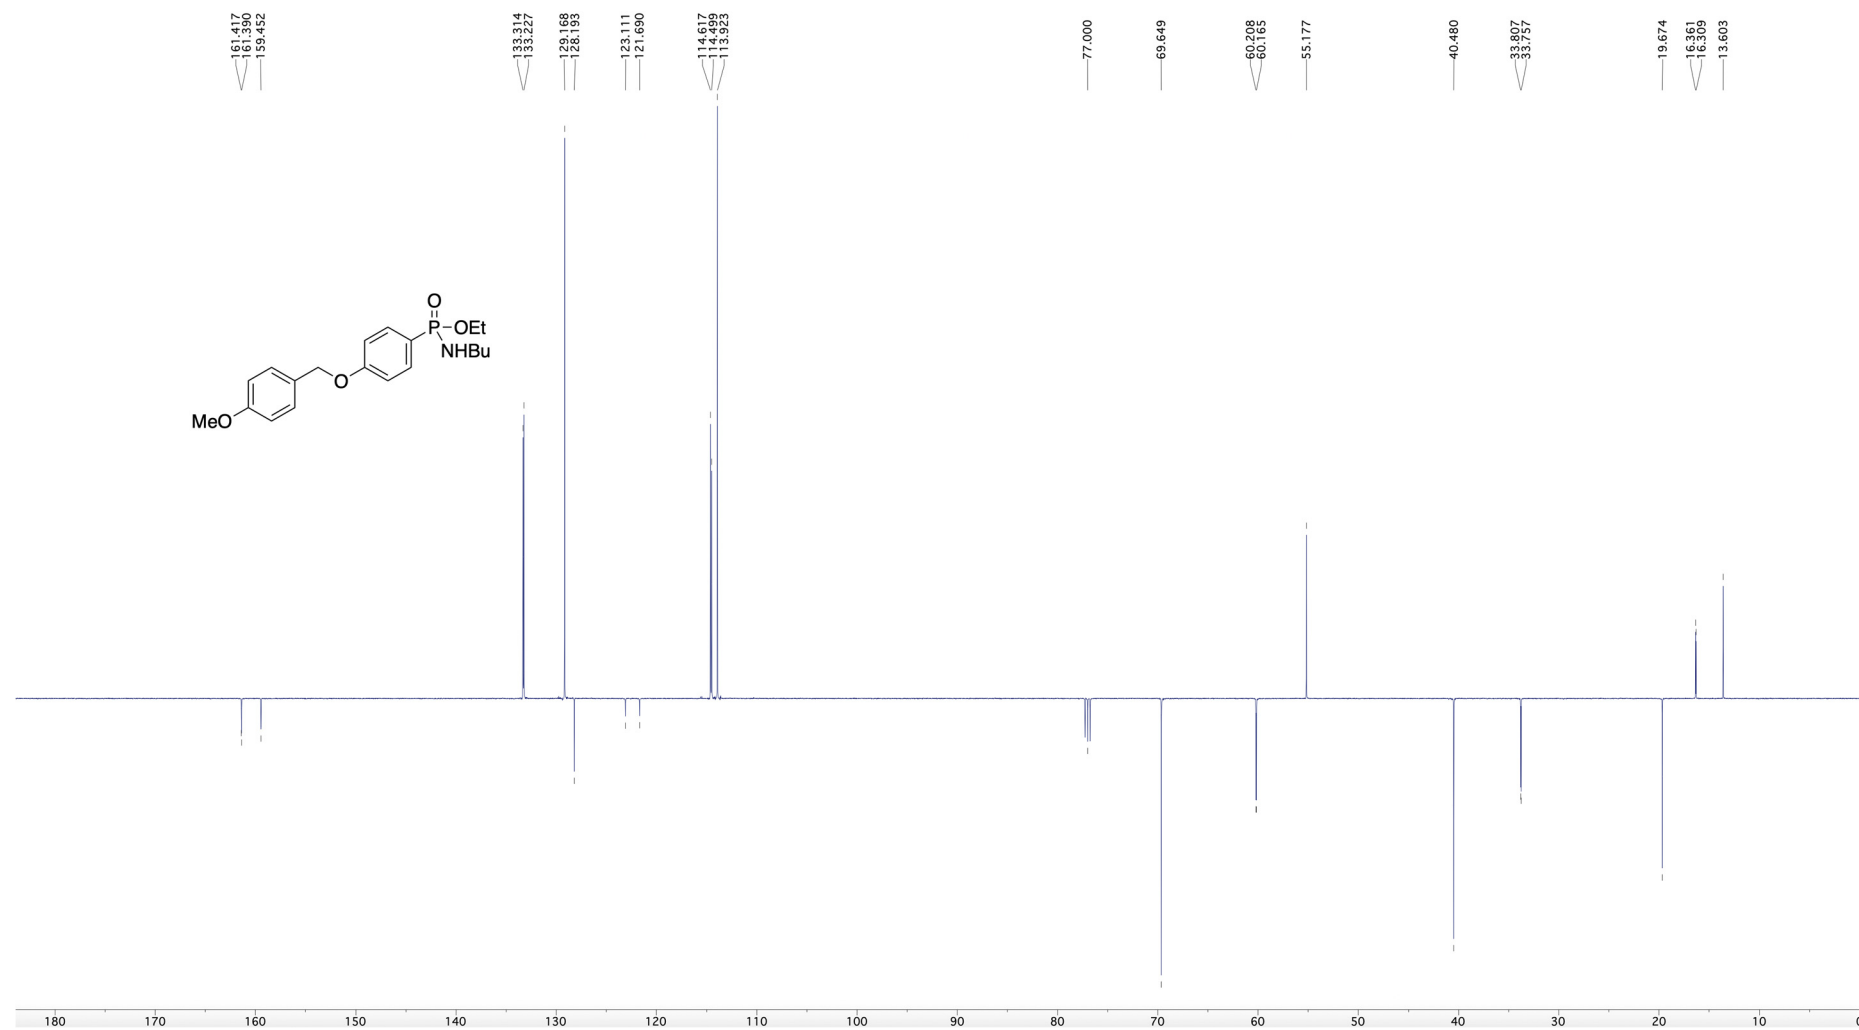

Figure S22. 400 MHz  $^1\text{H}$  NMR spectrum of **13c**

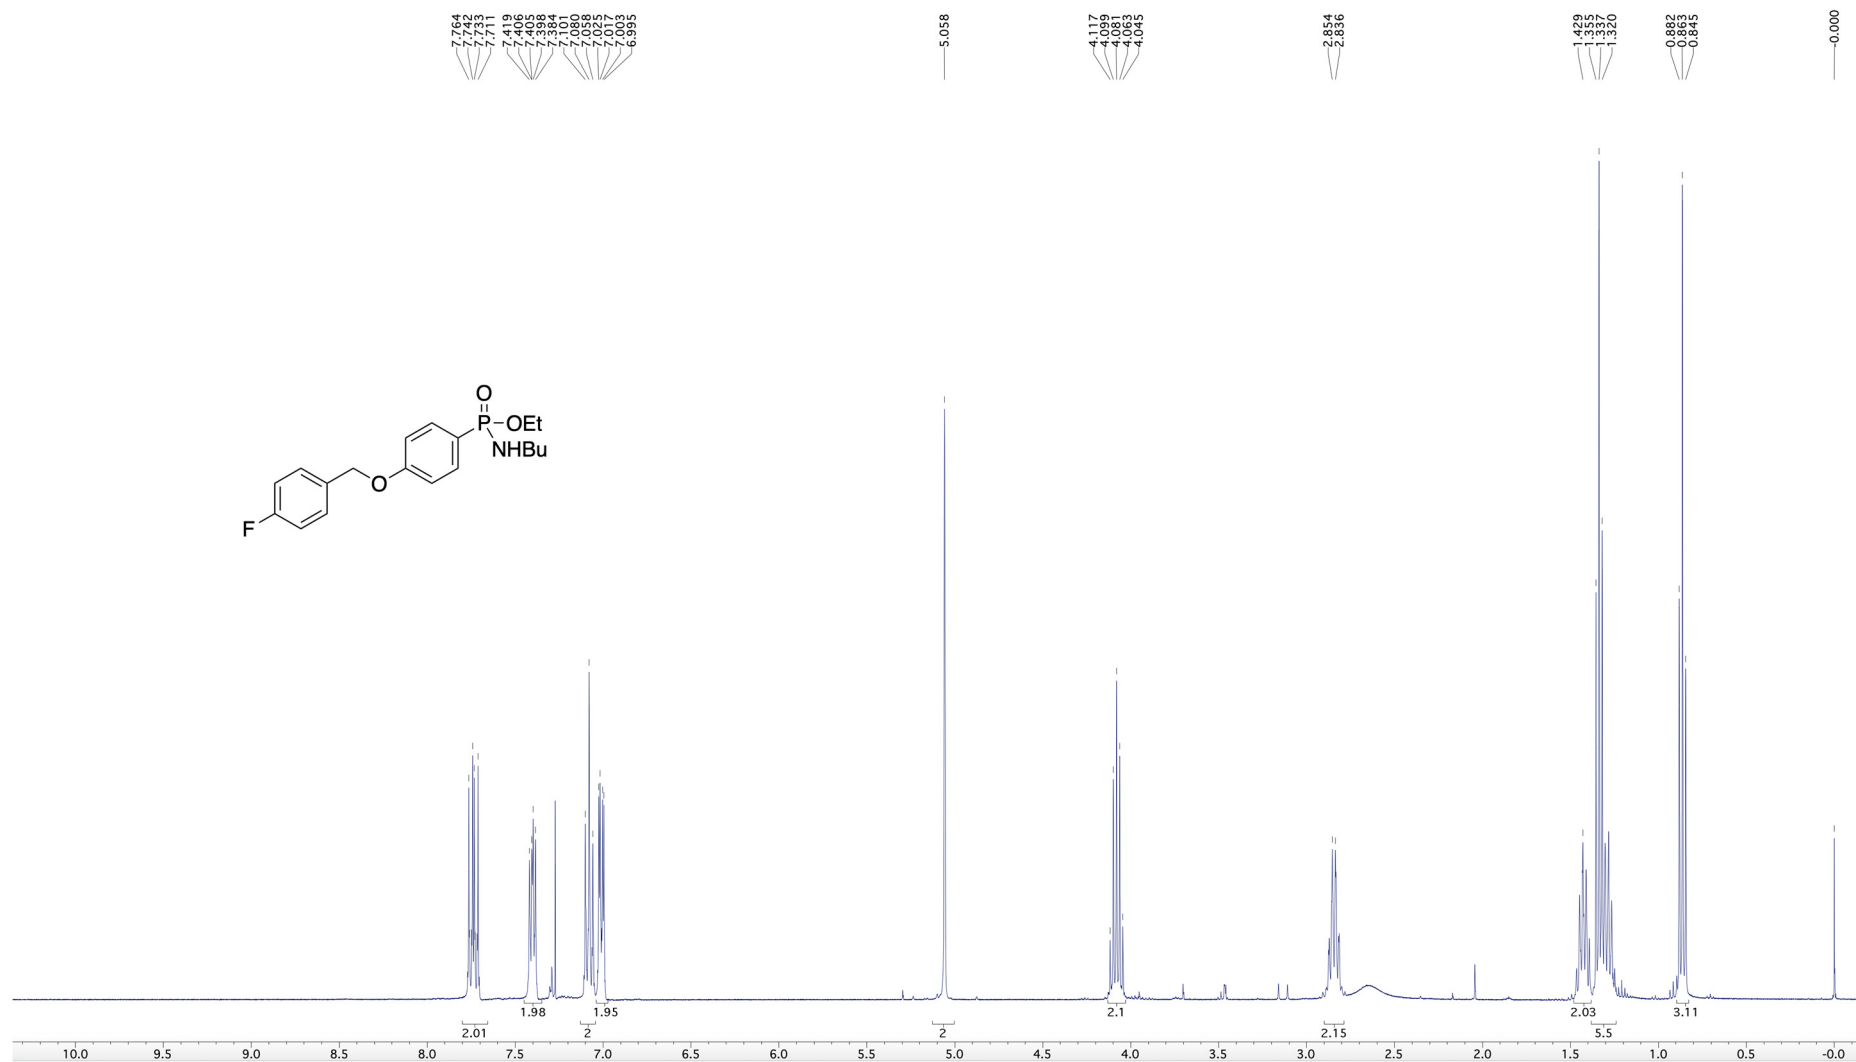

Figure S23. 376 MHz  $^{19}\text{F}$  NMR spectrum of **13c**

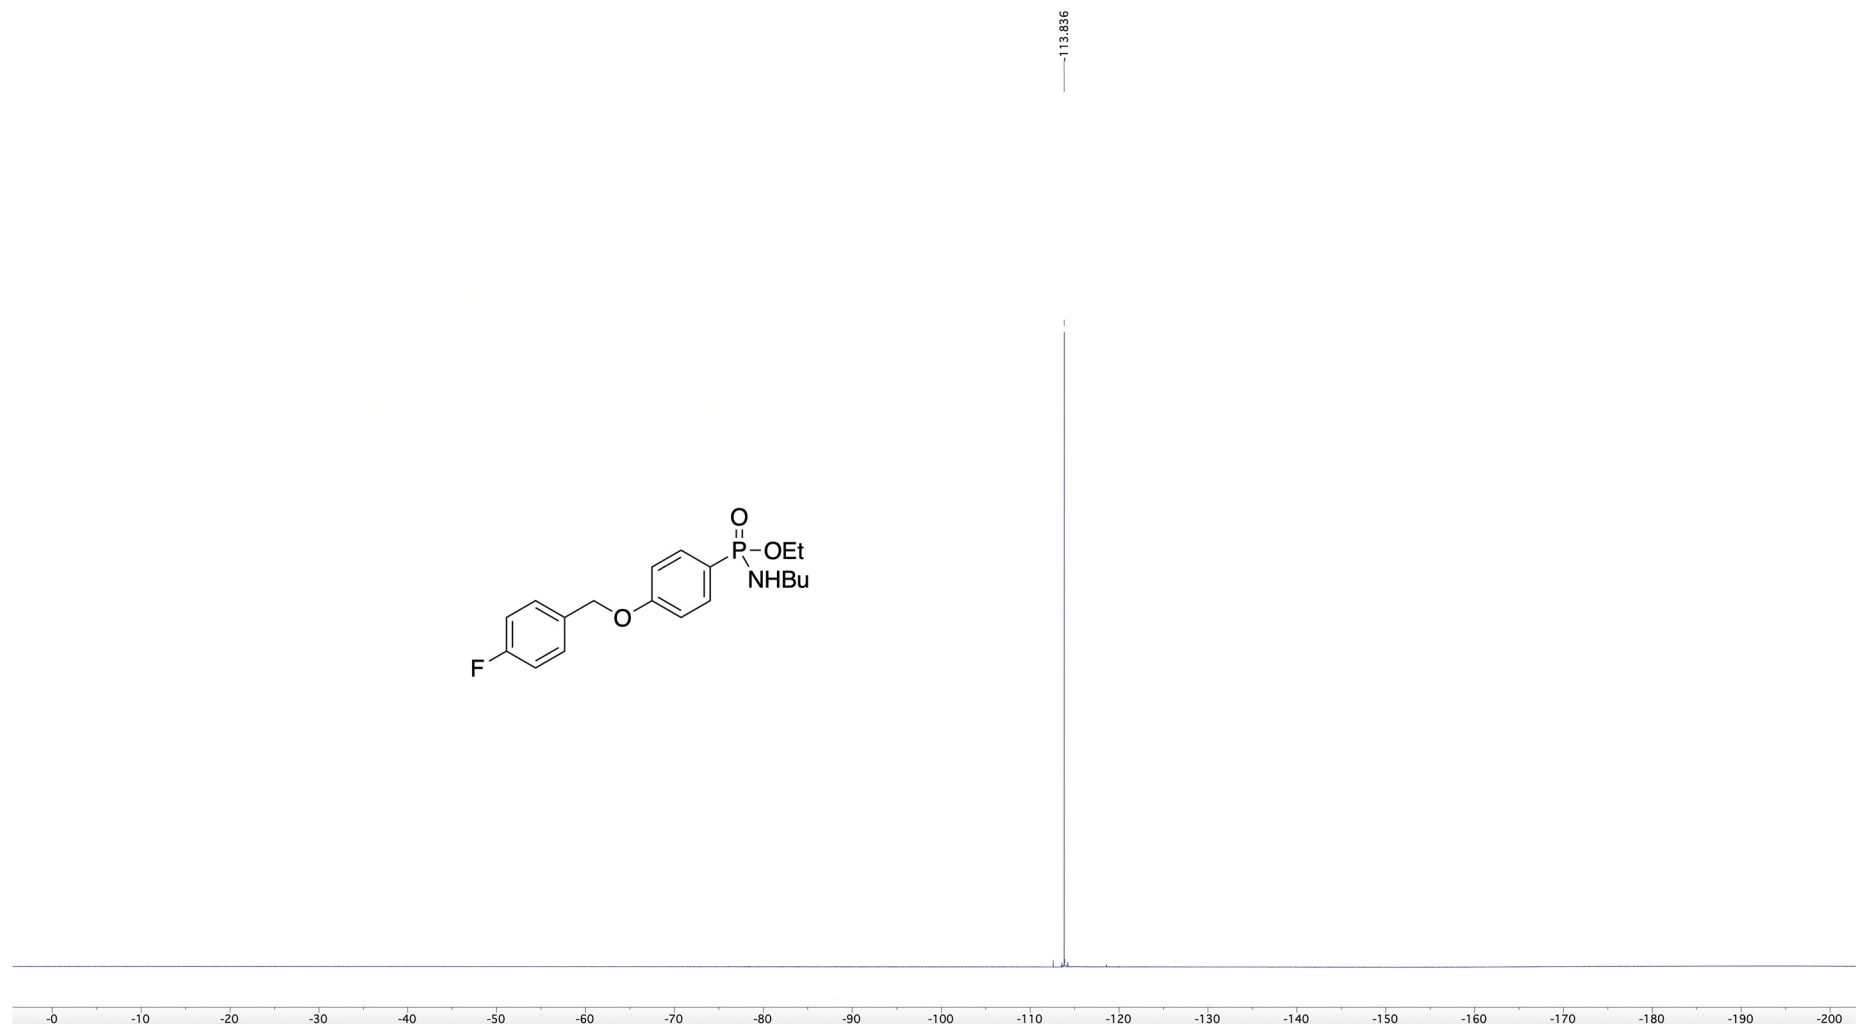

Figure S24. 162 MHz  $^{31}\text{P}$  NMR spectrum of **13c**

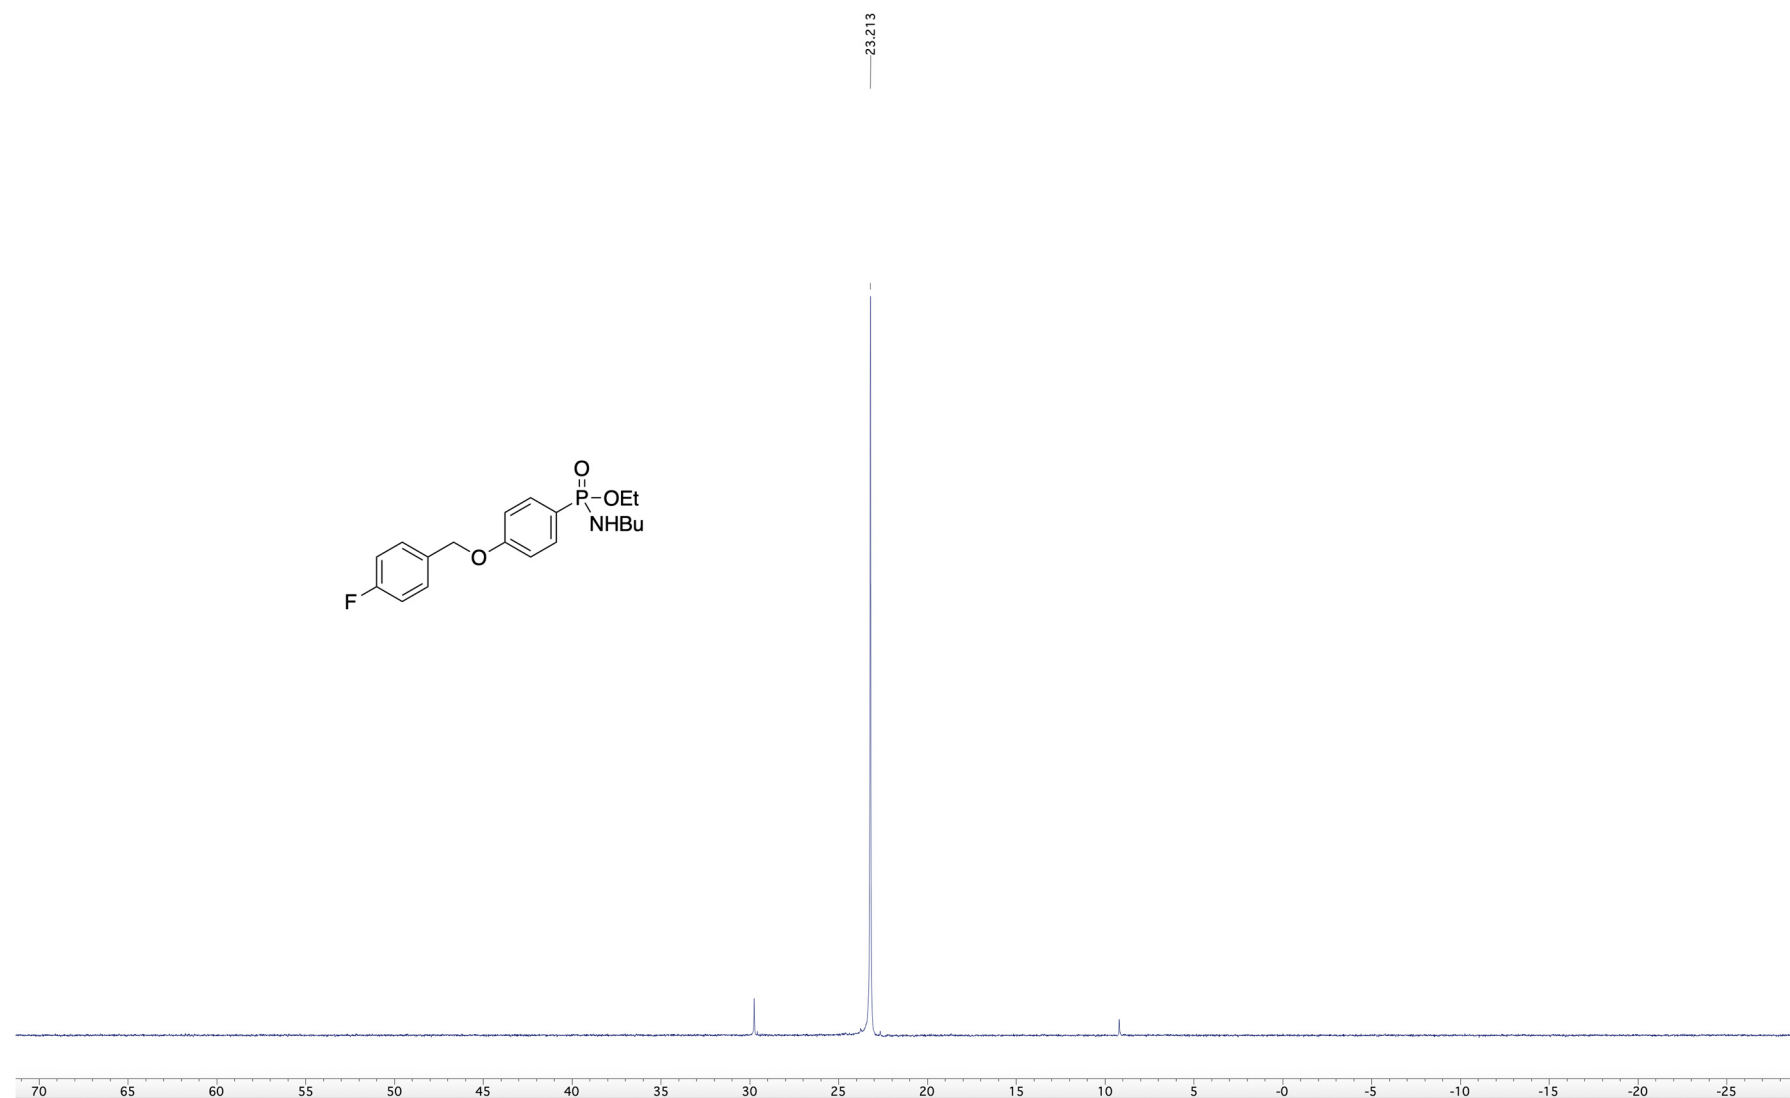

Figure S25. 100 MHz DEPTQ  $^{13}\text{C}$  NMR spectrum of **13c**

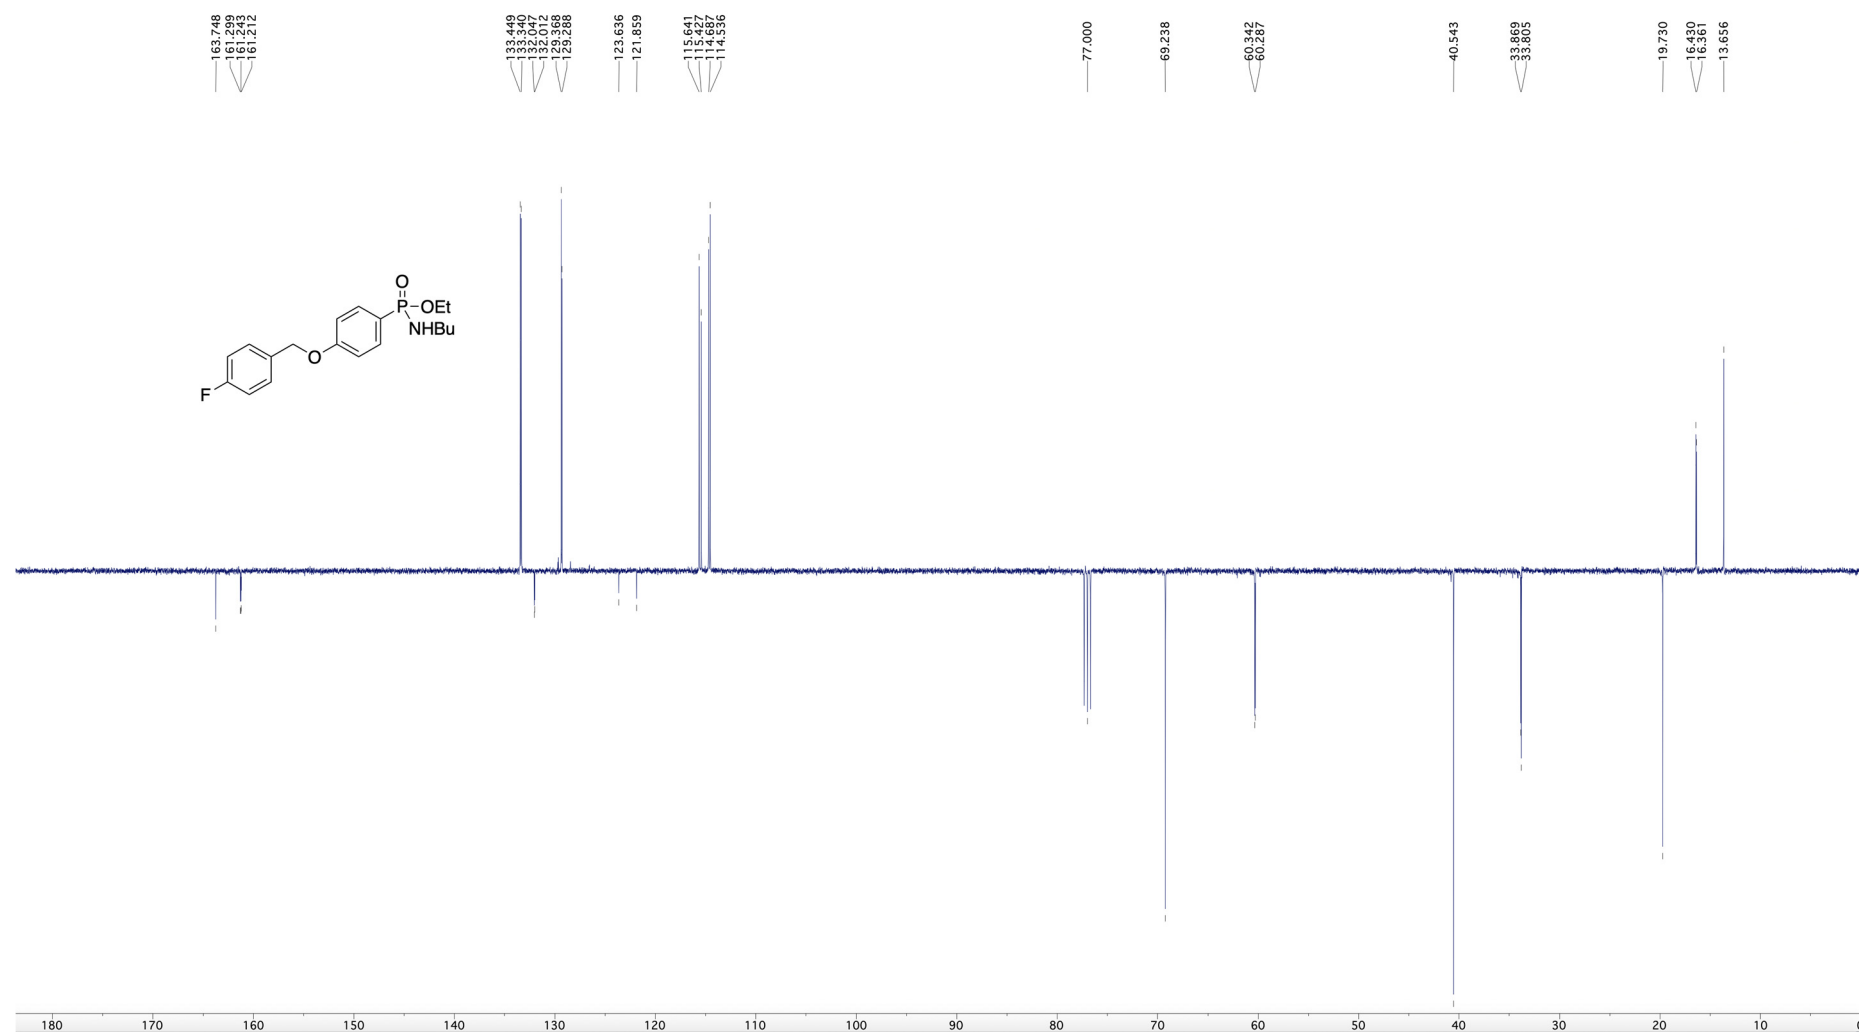

Figure S26. 400 MHz  $^1\text{H}$  NMR spectrum of **13d**

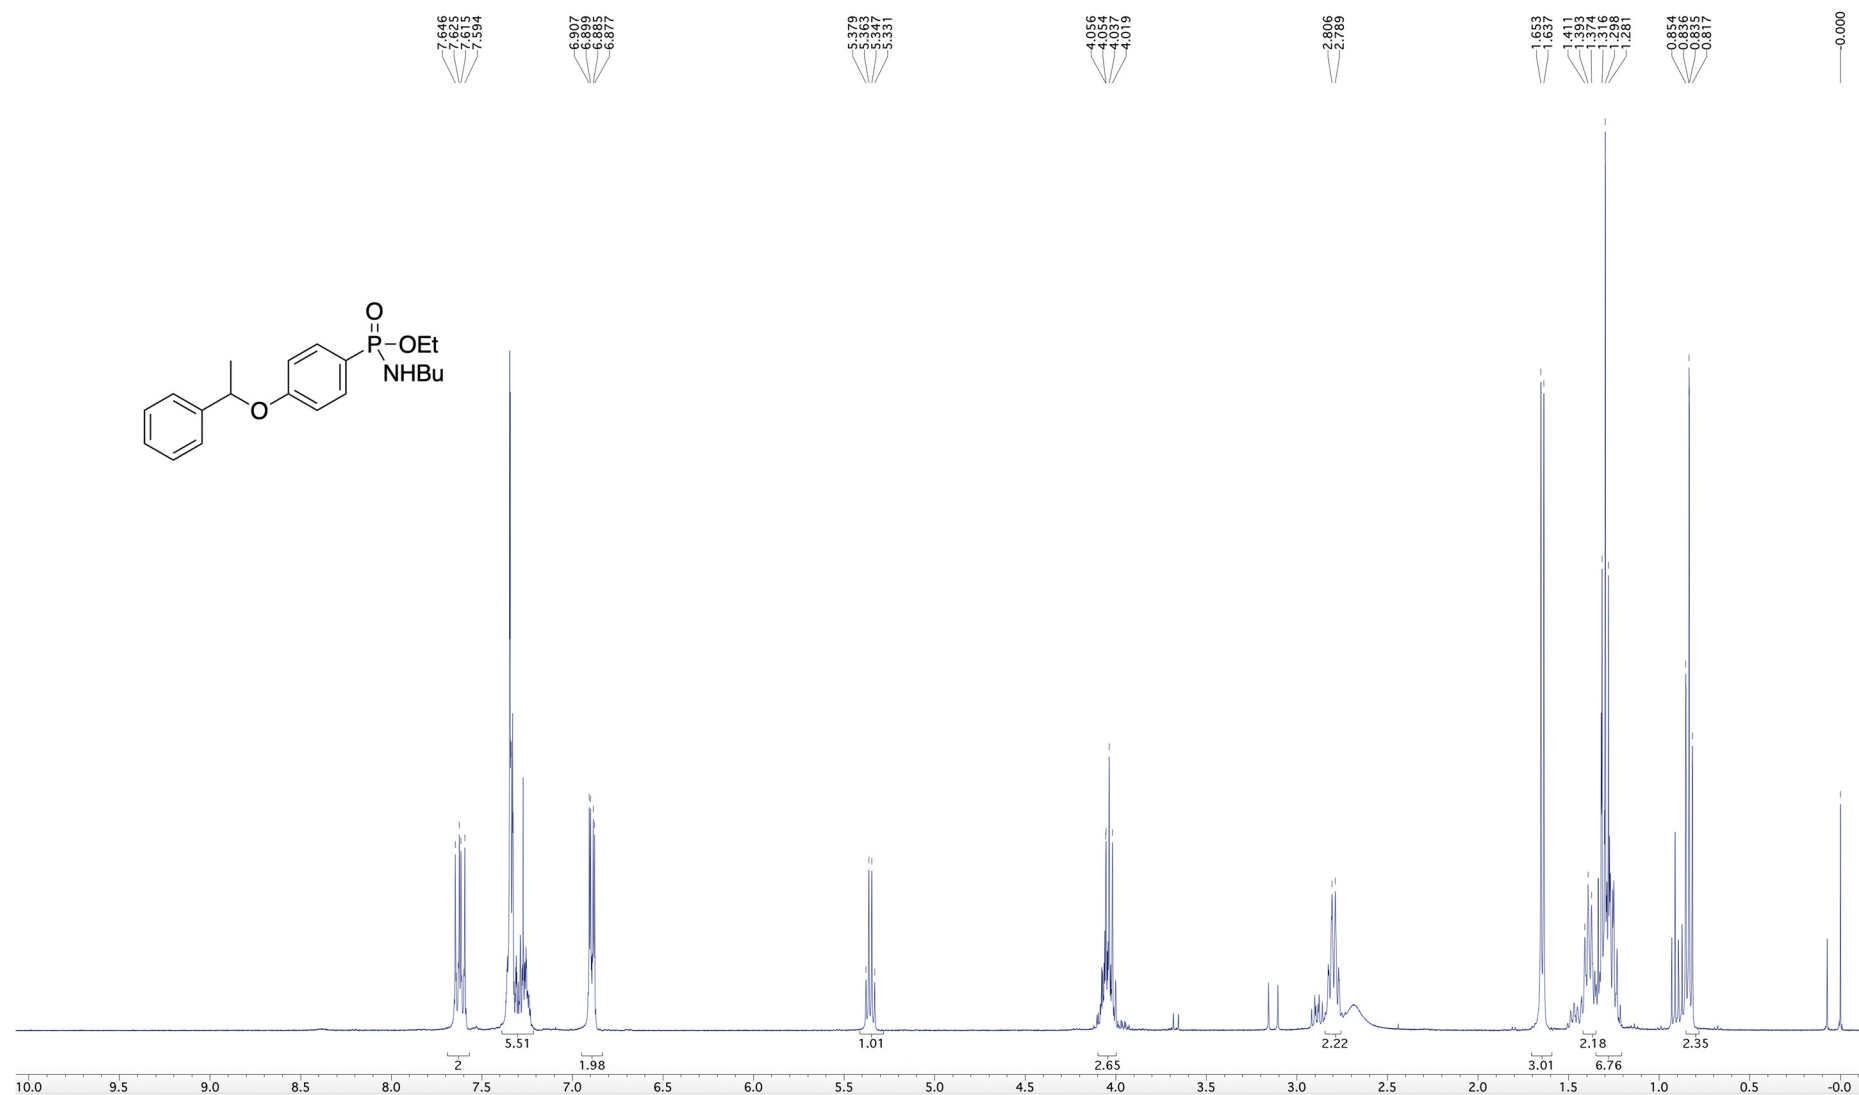



Figure S27. 162 MHz  $^{31}\text{P}$  NMR spectrum of **13d**

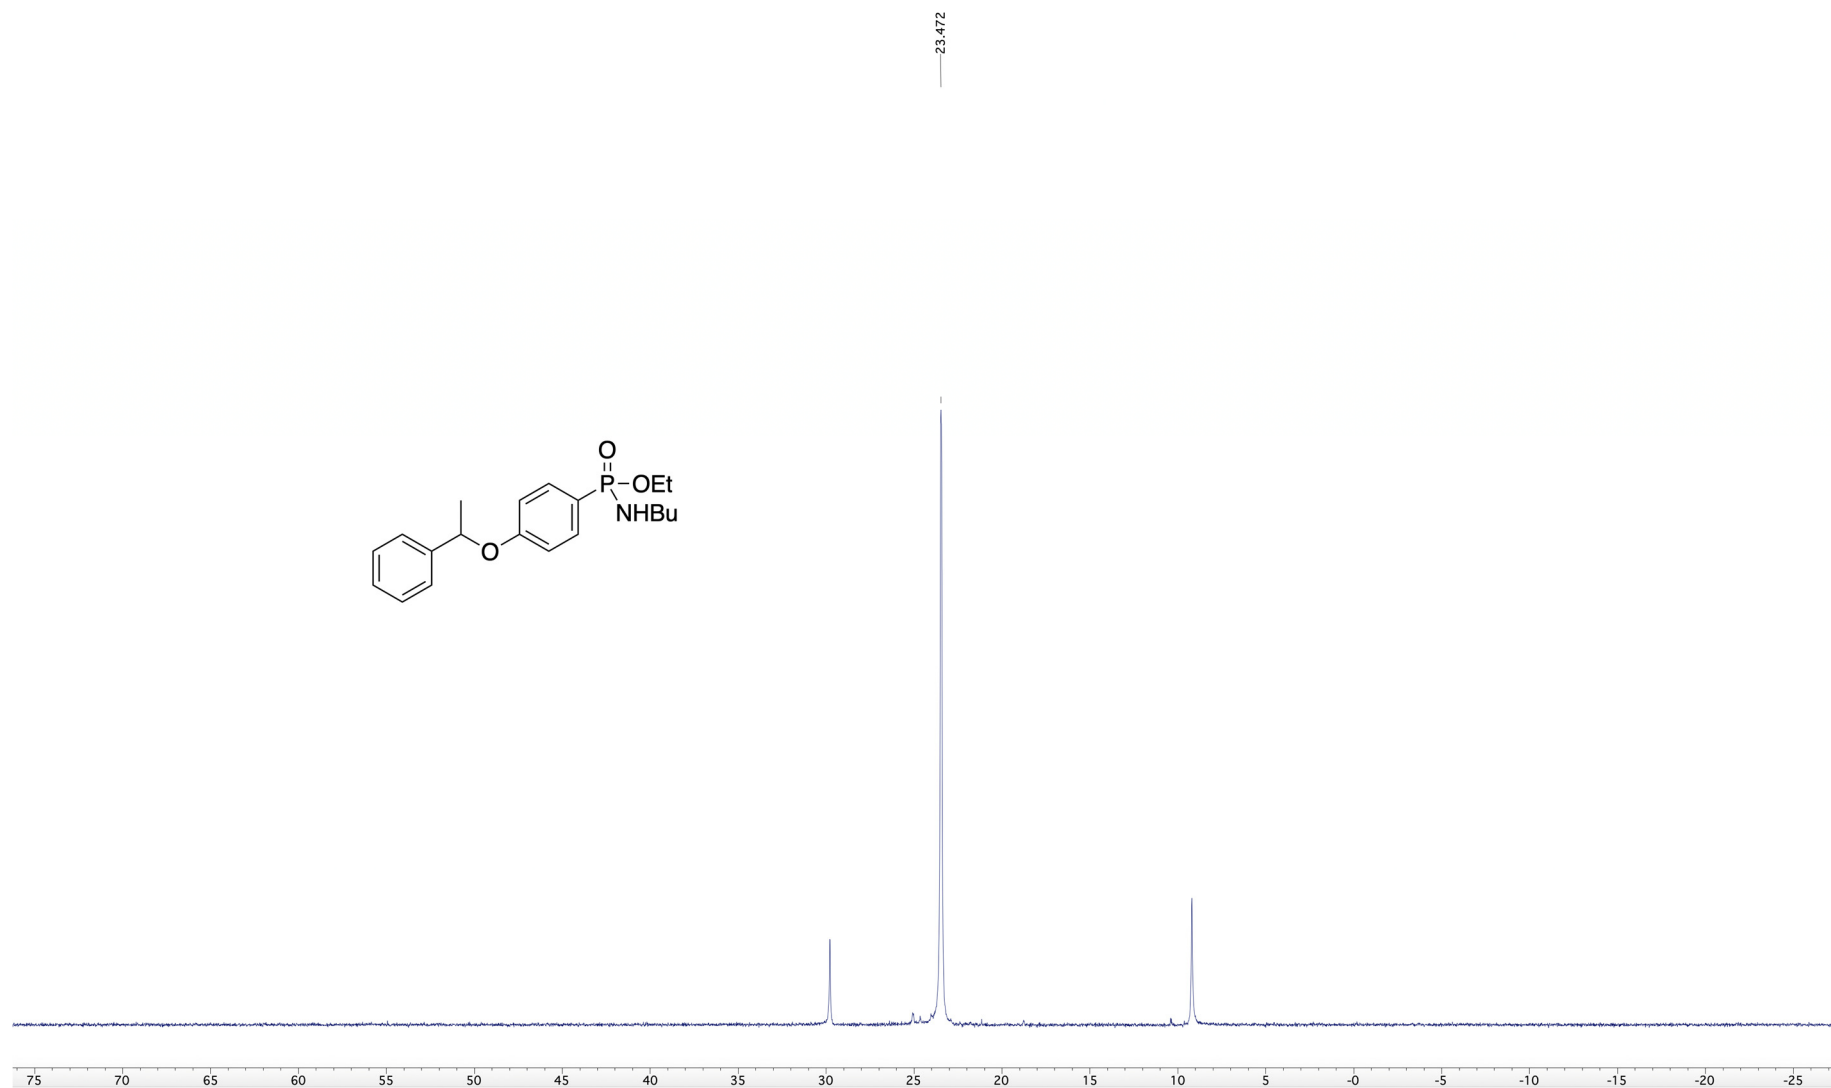

Figure S28. 125 MHz DEPTQ  $^{13}\text{C}$  NMR spectrum of **13d**

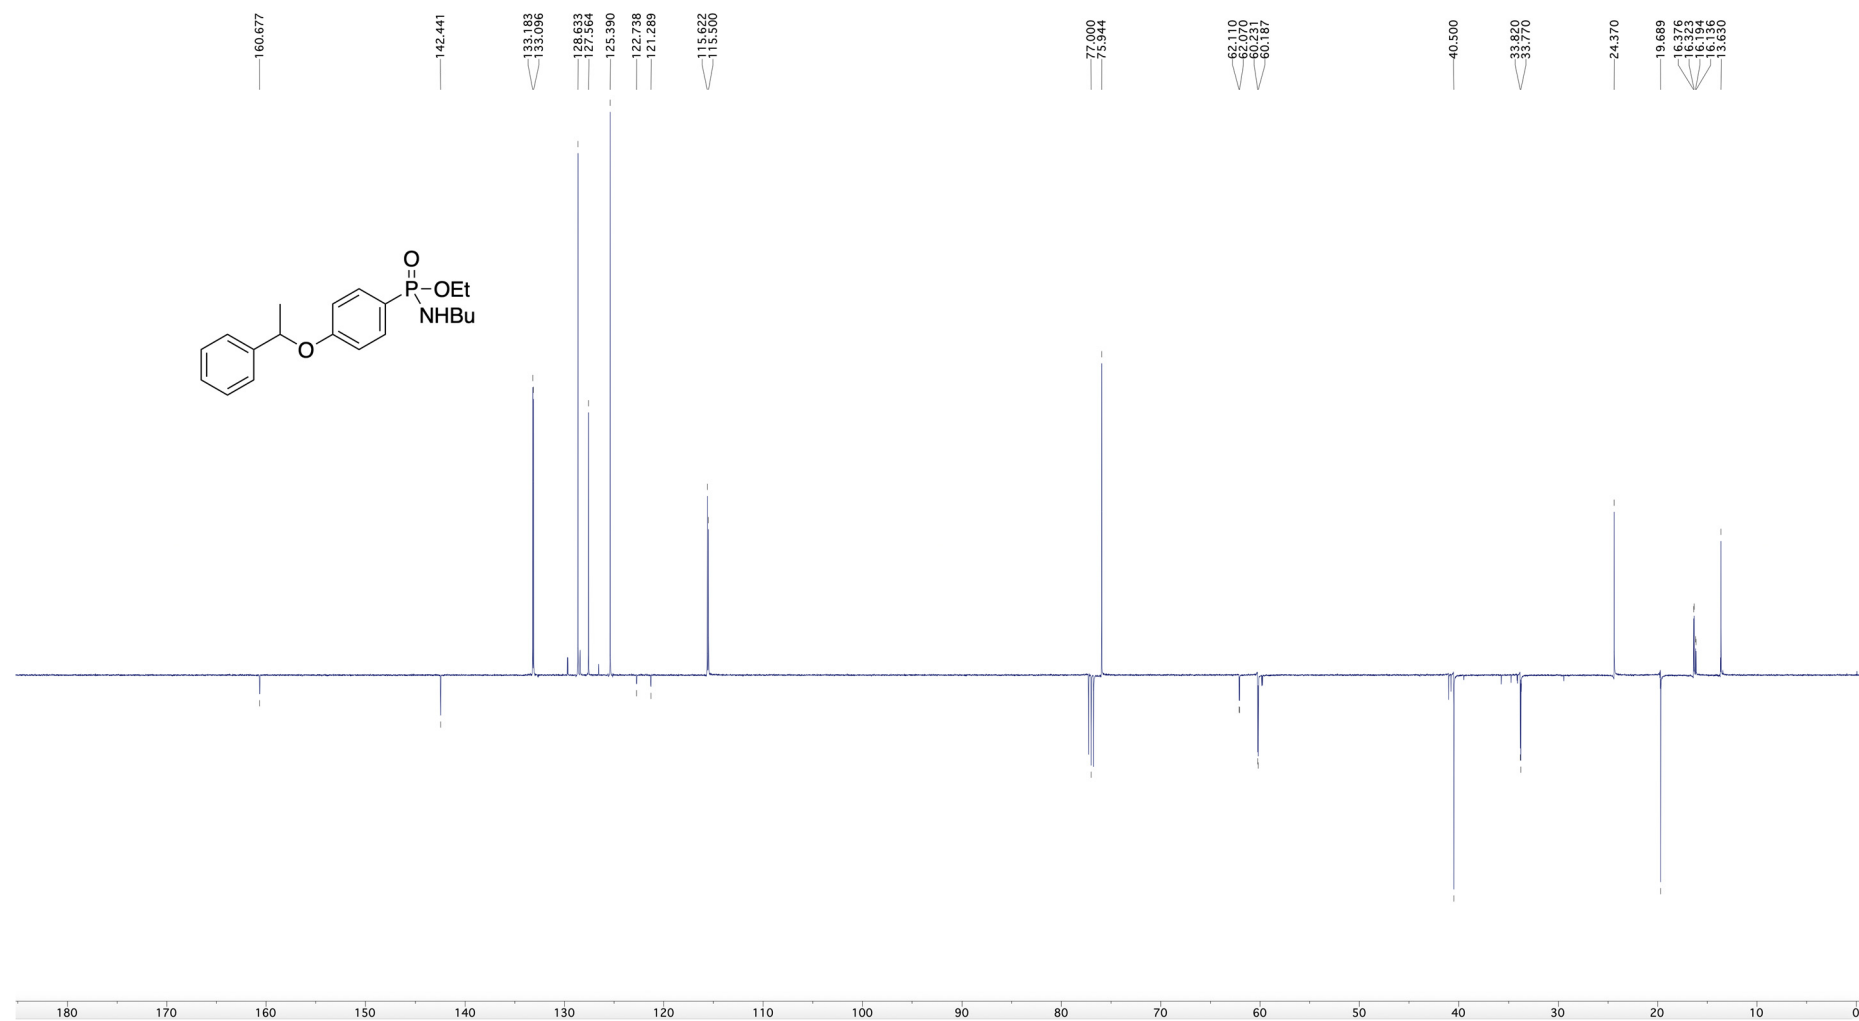

Figure S29. 400 MHz  $^1\text{H}$  NMR spectrum of **13e**

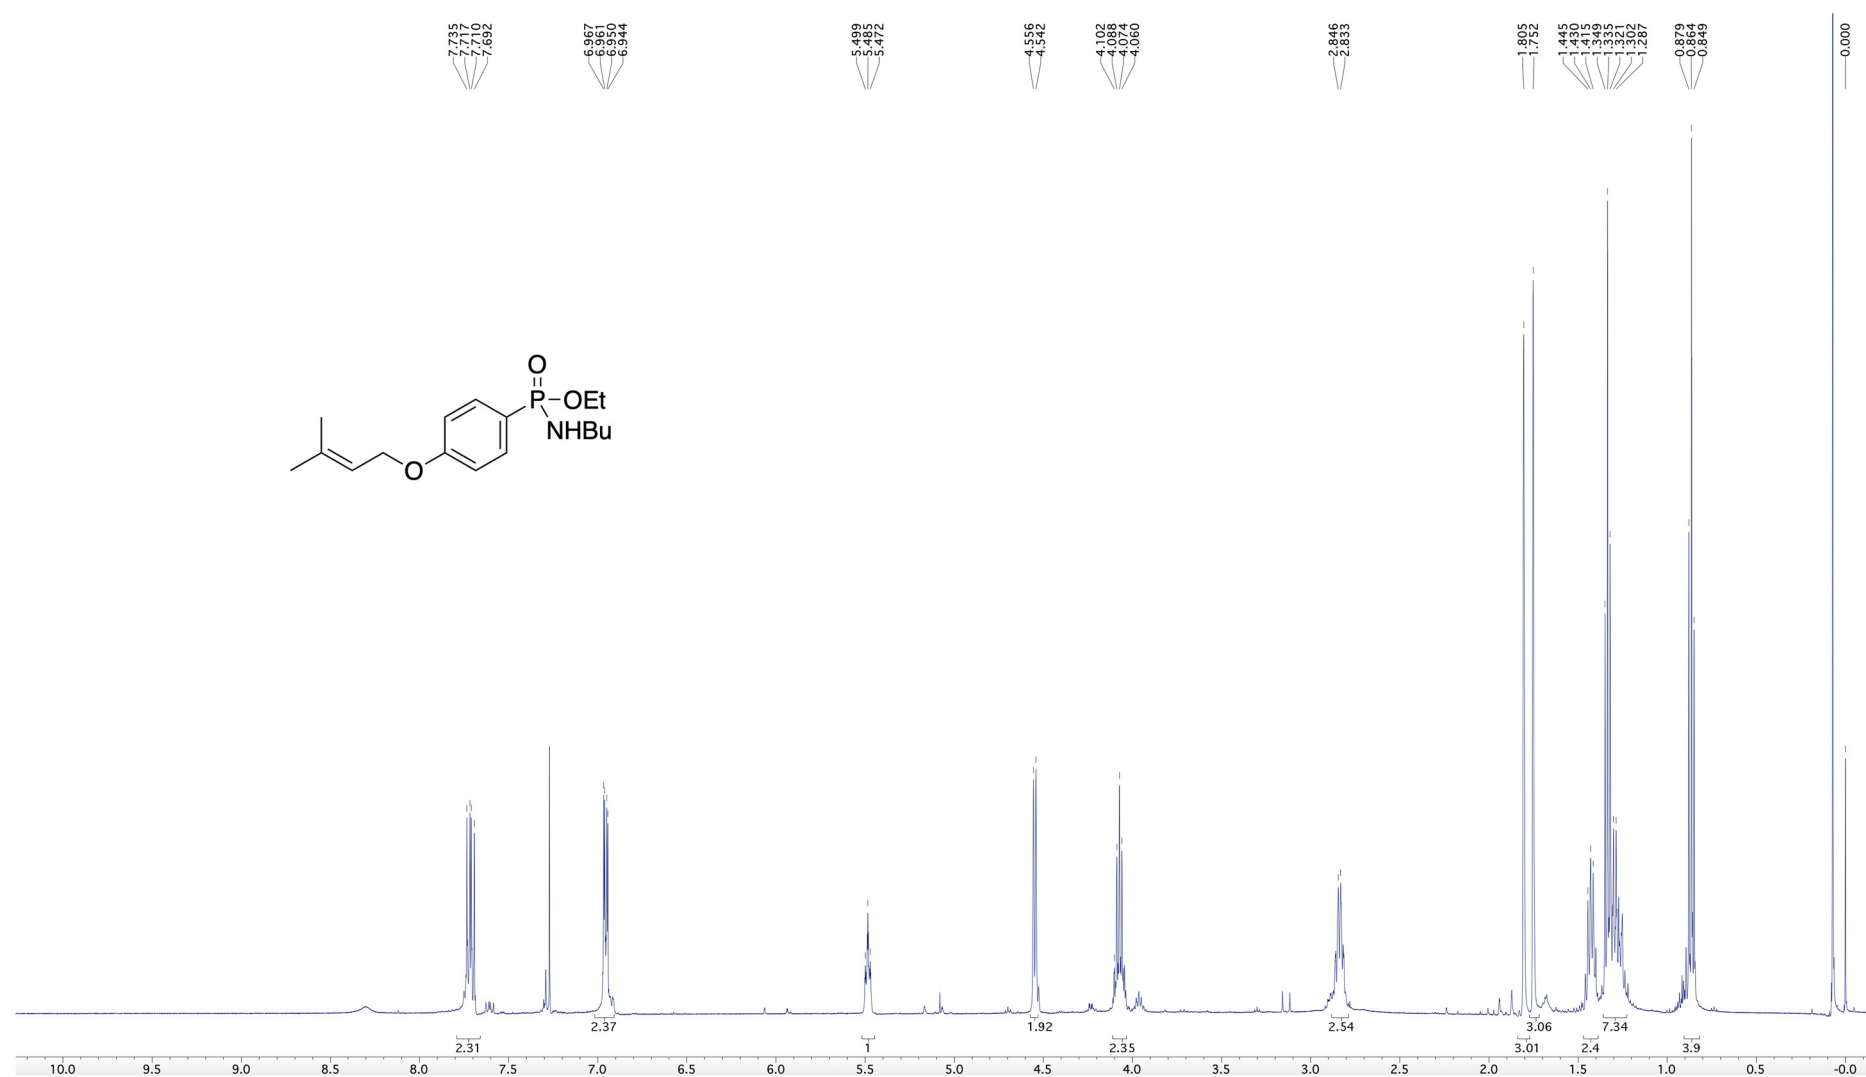

Figure S30. 162 MHz  $^{31}\text{P}$  NMR spectrum of **13e**

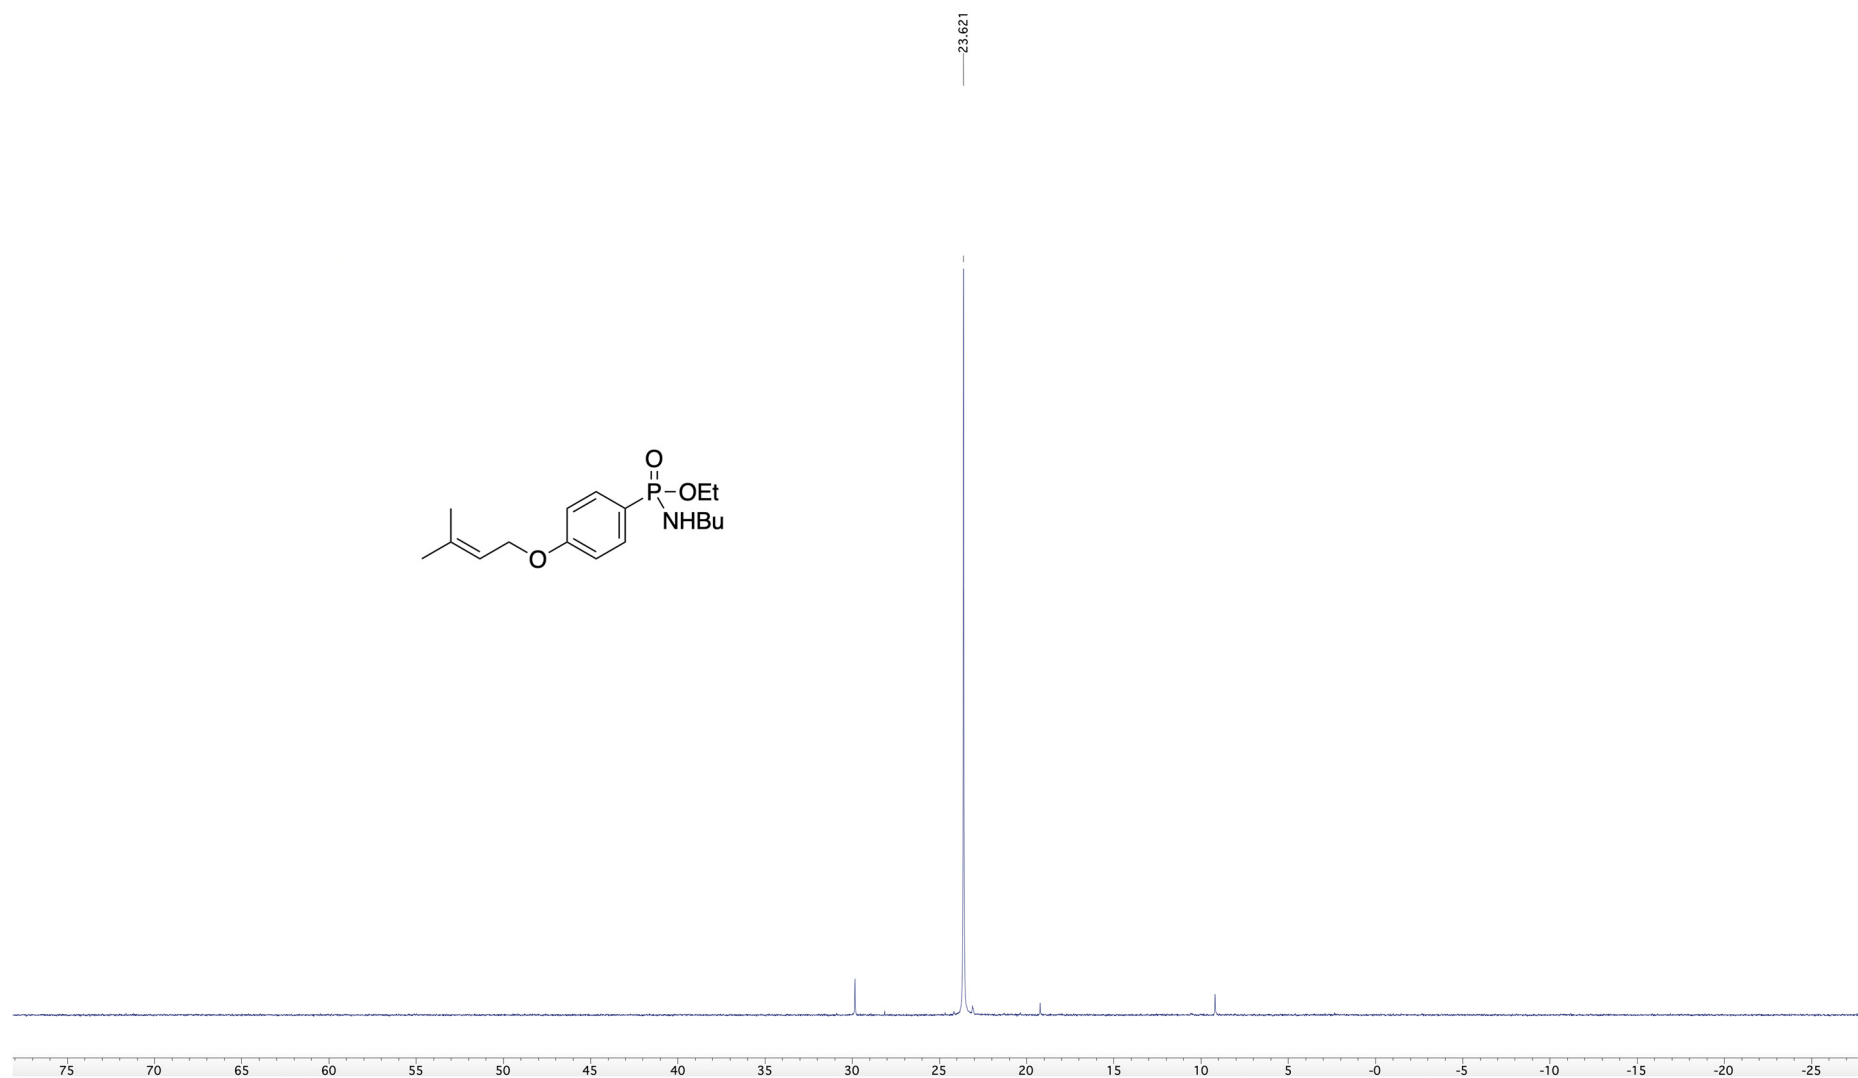

Figure S31. 125 MHz DEPTQ  $^{13}\text{C}$  NMR spectrum of **13e**

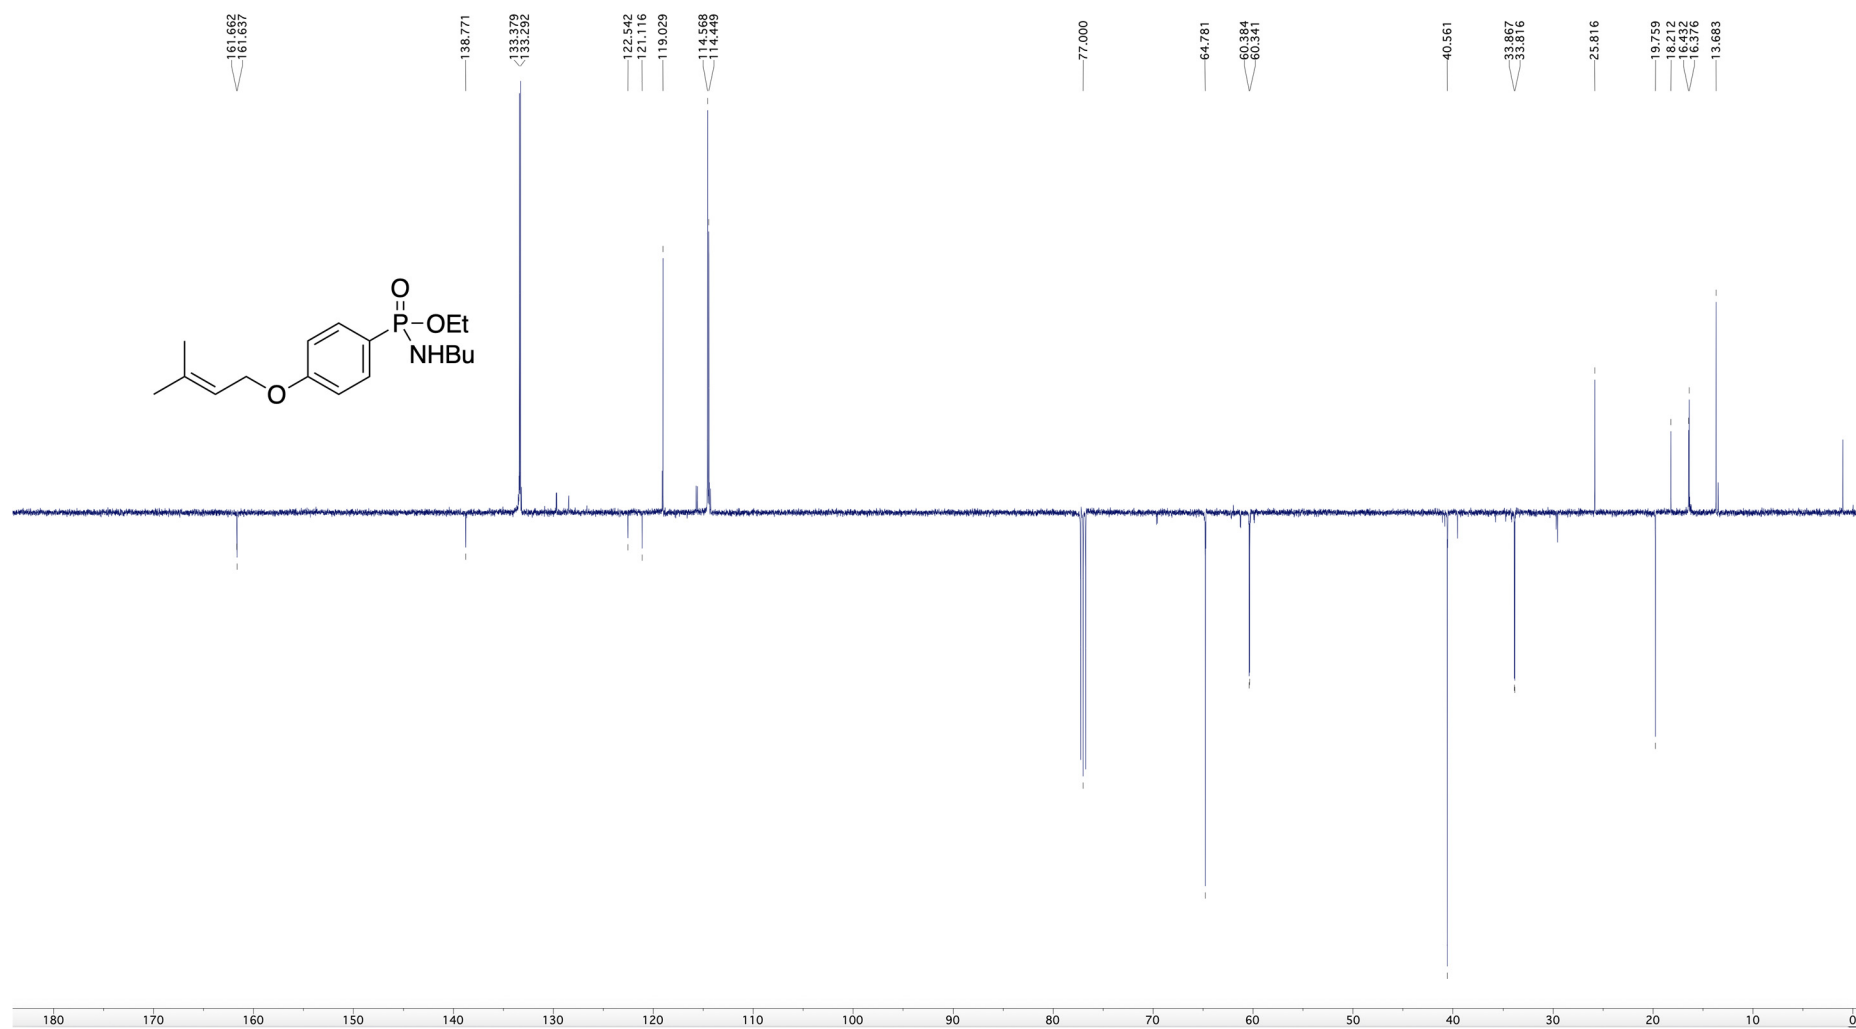

Figure S32. 400 MHz  $^1\text{H}$  NMR spectrum of **14a**

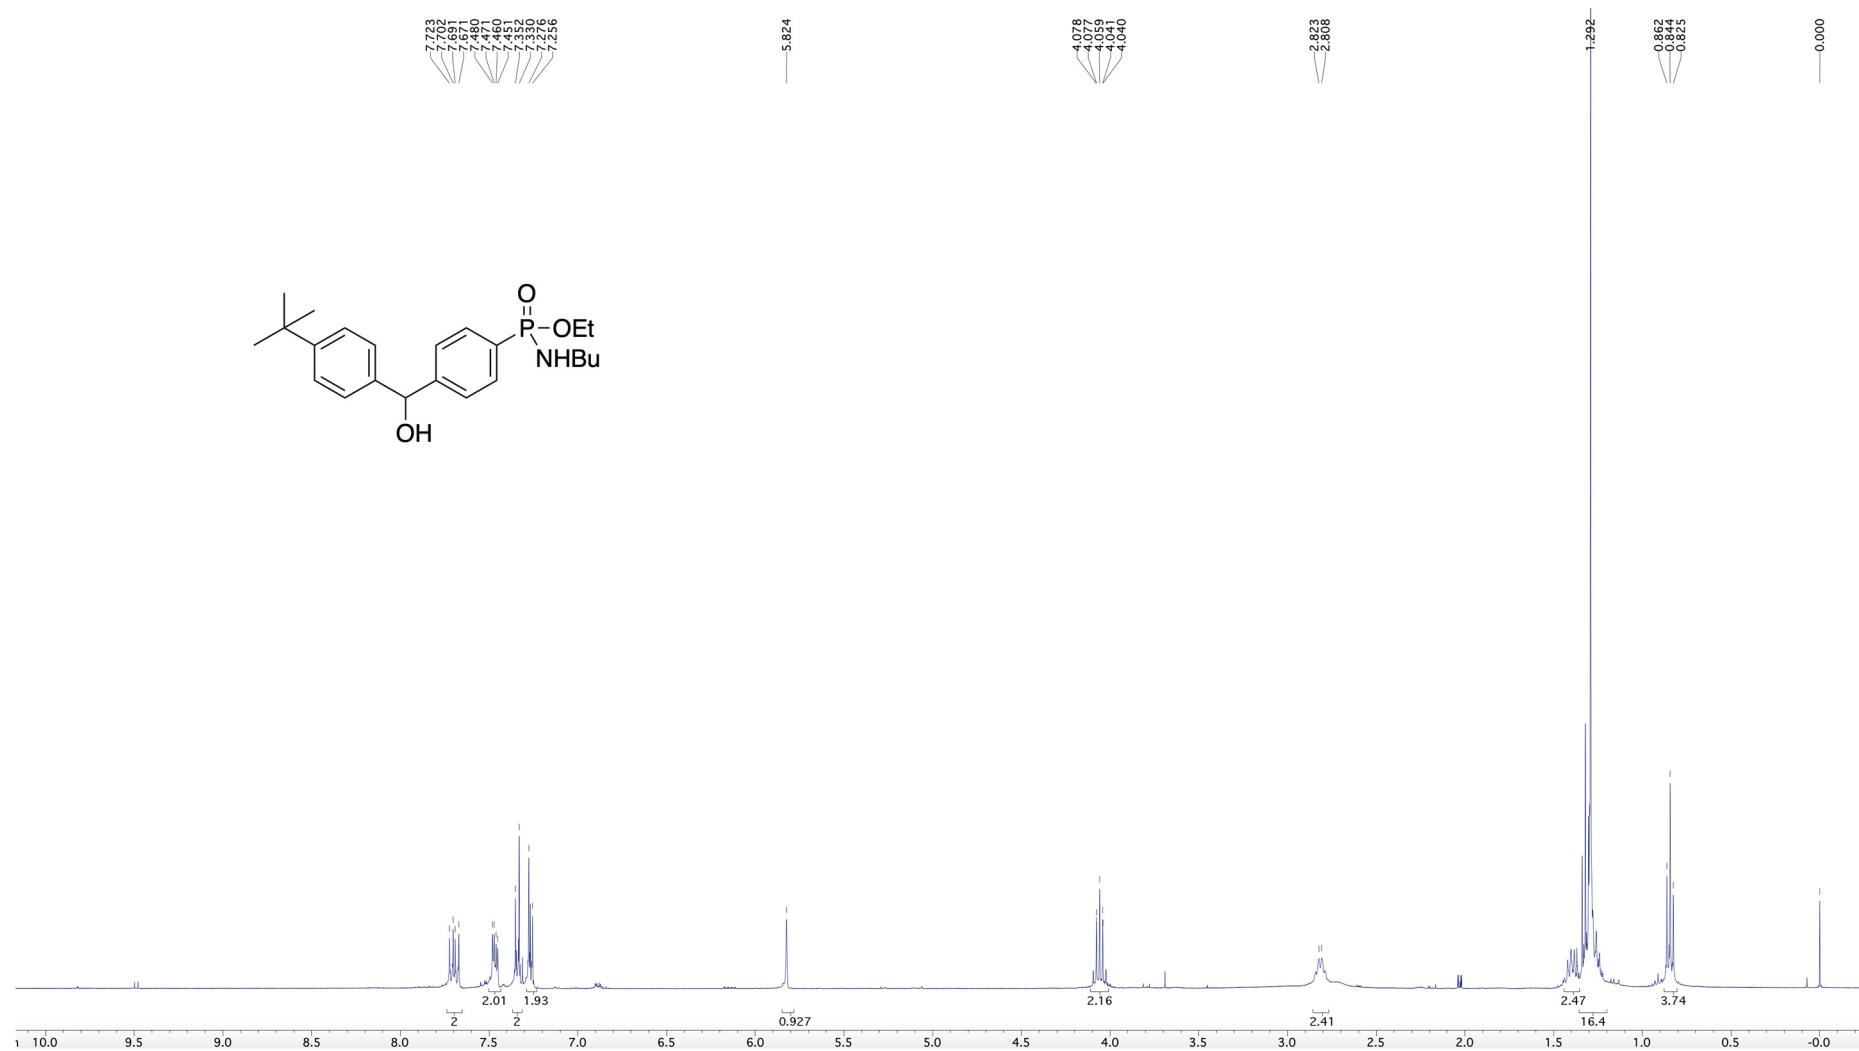

Figure S33. 162 MHz  $^{31}\text{P}$  NMR spectrum of **14a**

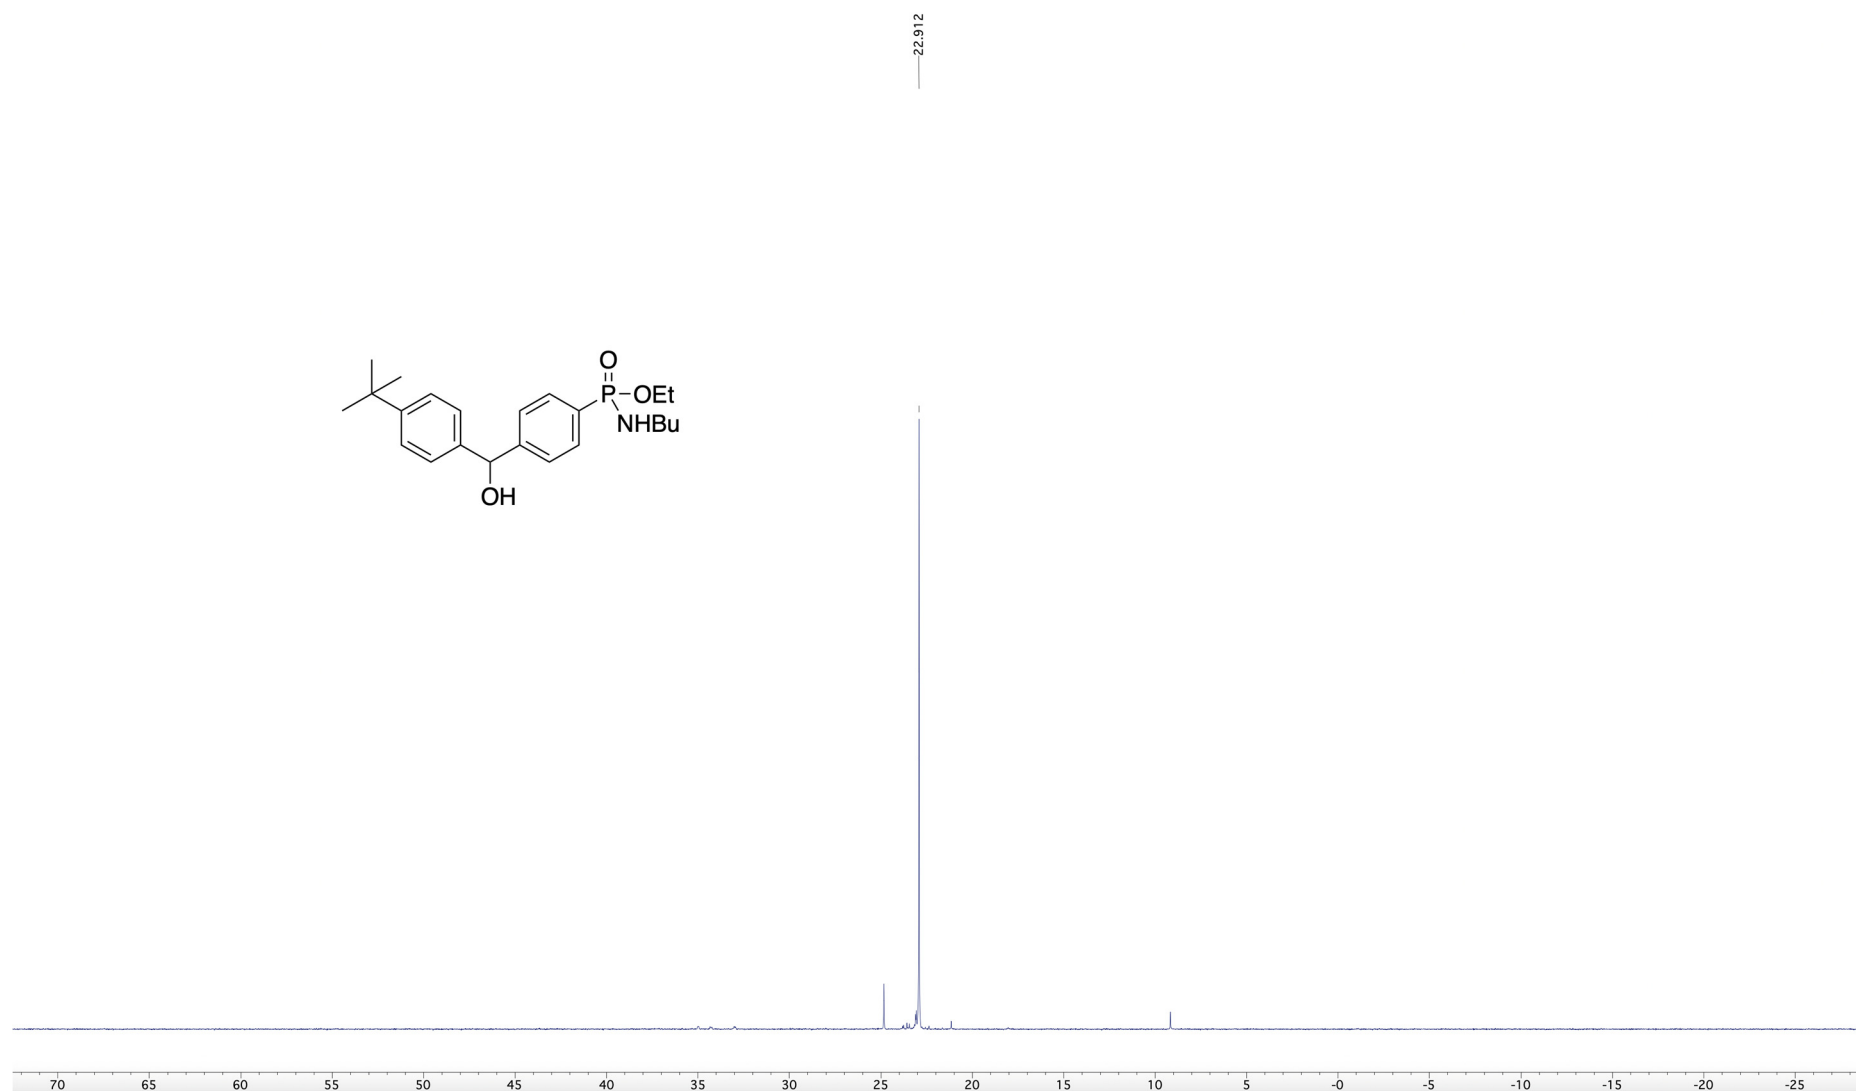

Figure S34. 100 MHz DEPTQ  $^{13}\text{C}$  NMR spectrum of **14a**

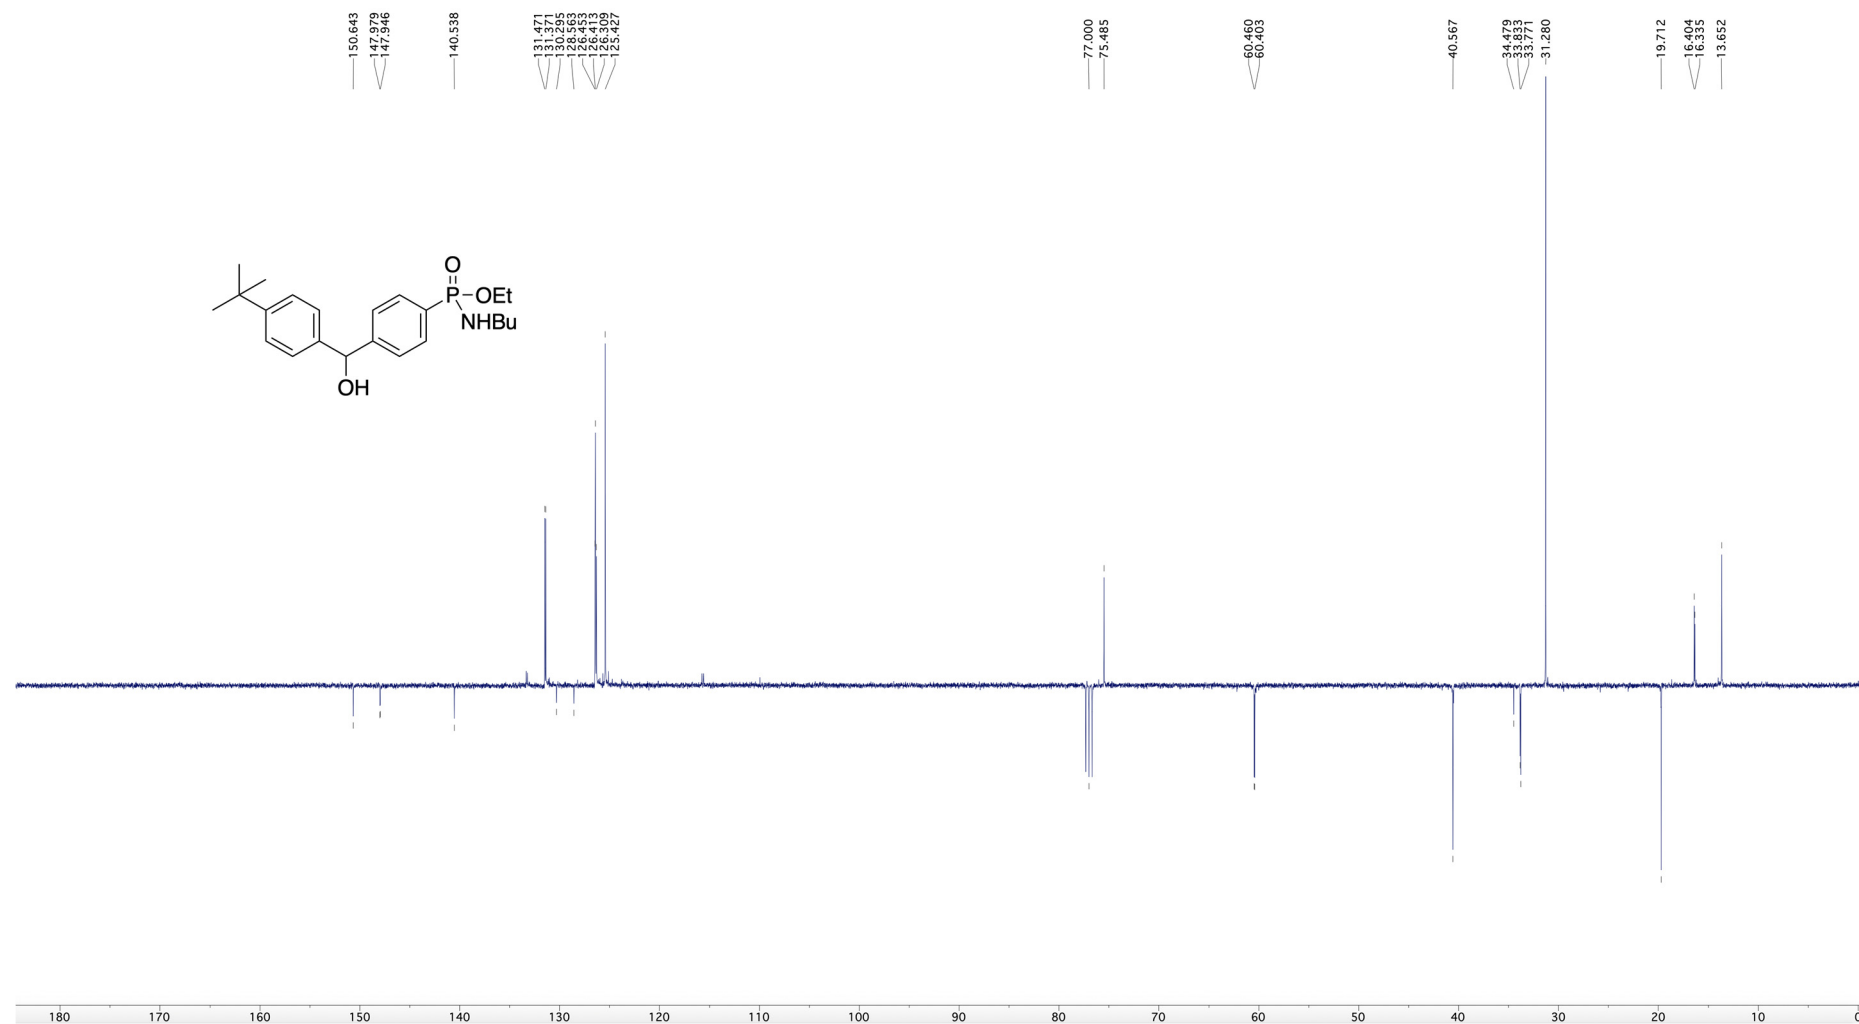



Figure S35. 400 MHz  $^1\text{H}$  NMR spectrum of **14b**

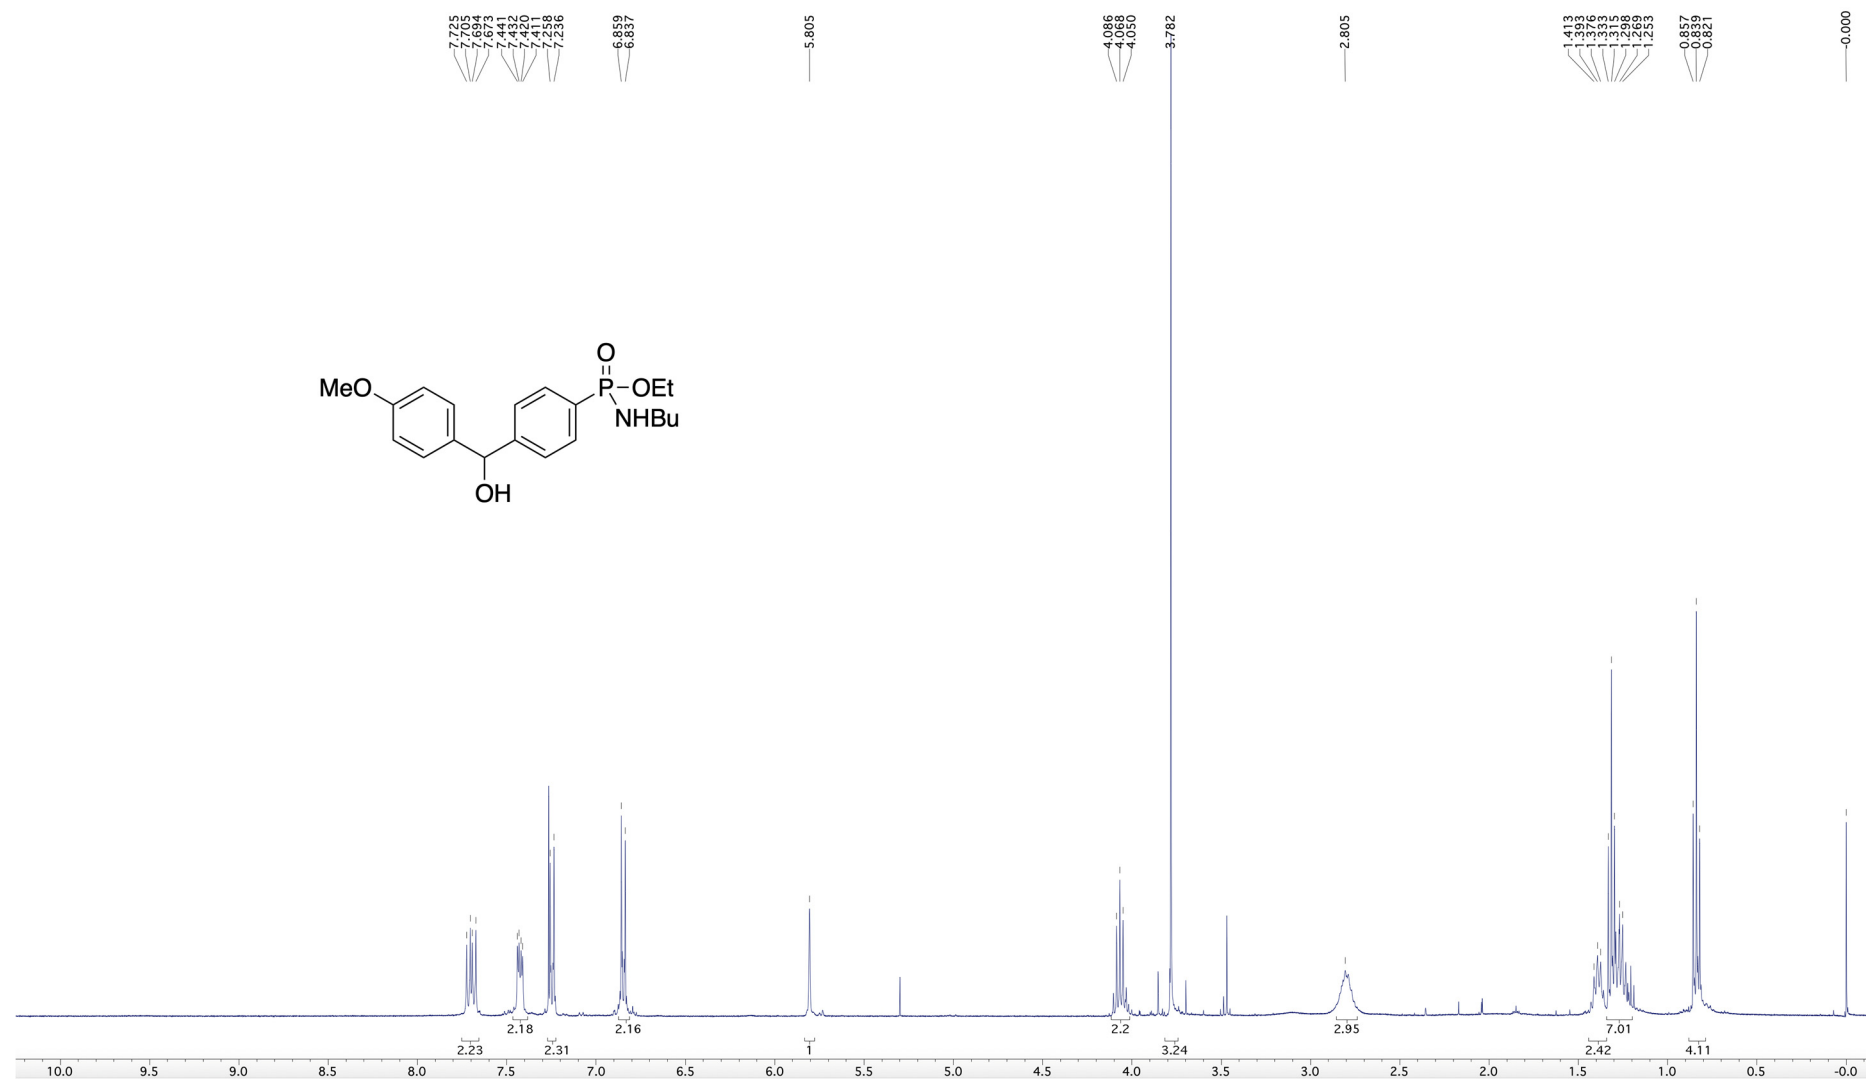

Figure S36. 162 MHz  $^{31}\text{P}$  NMR spectrum of **14b**

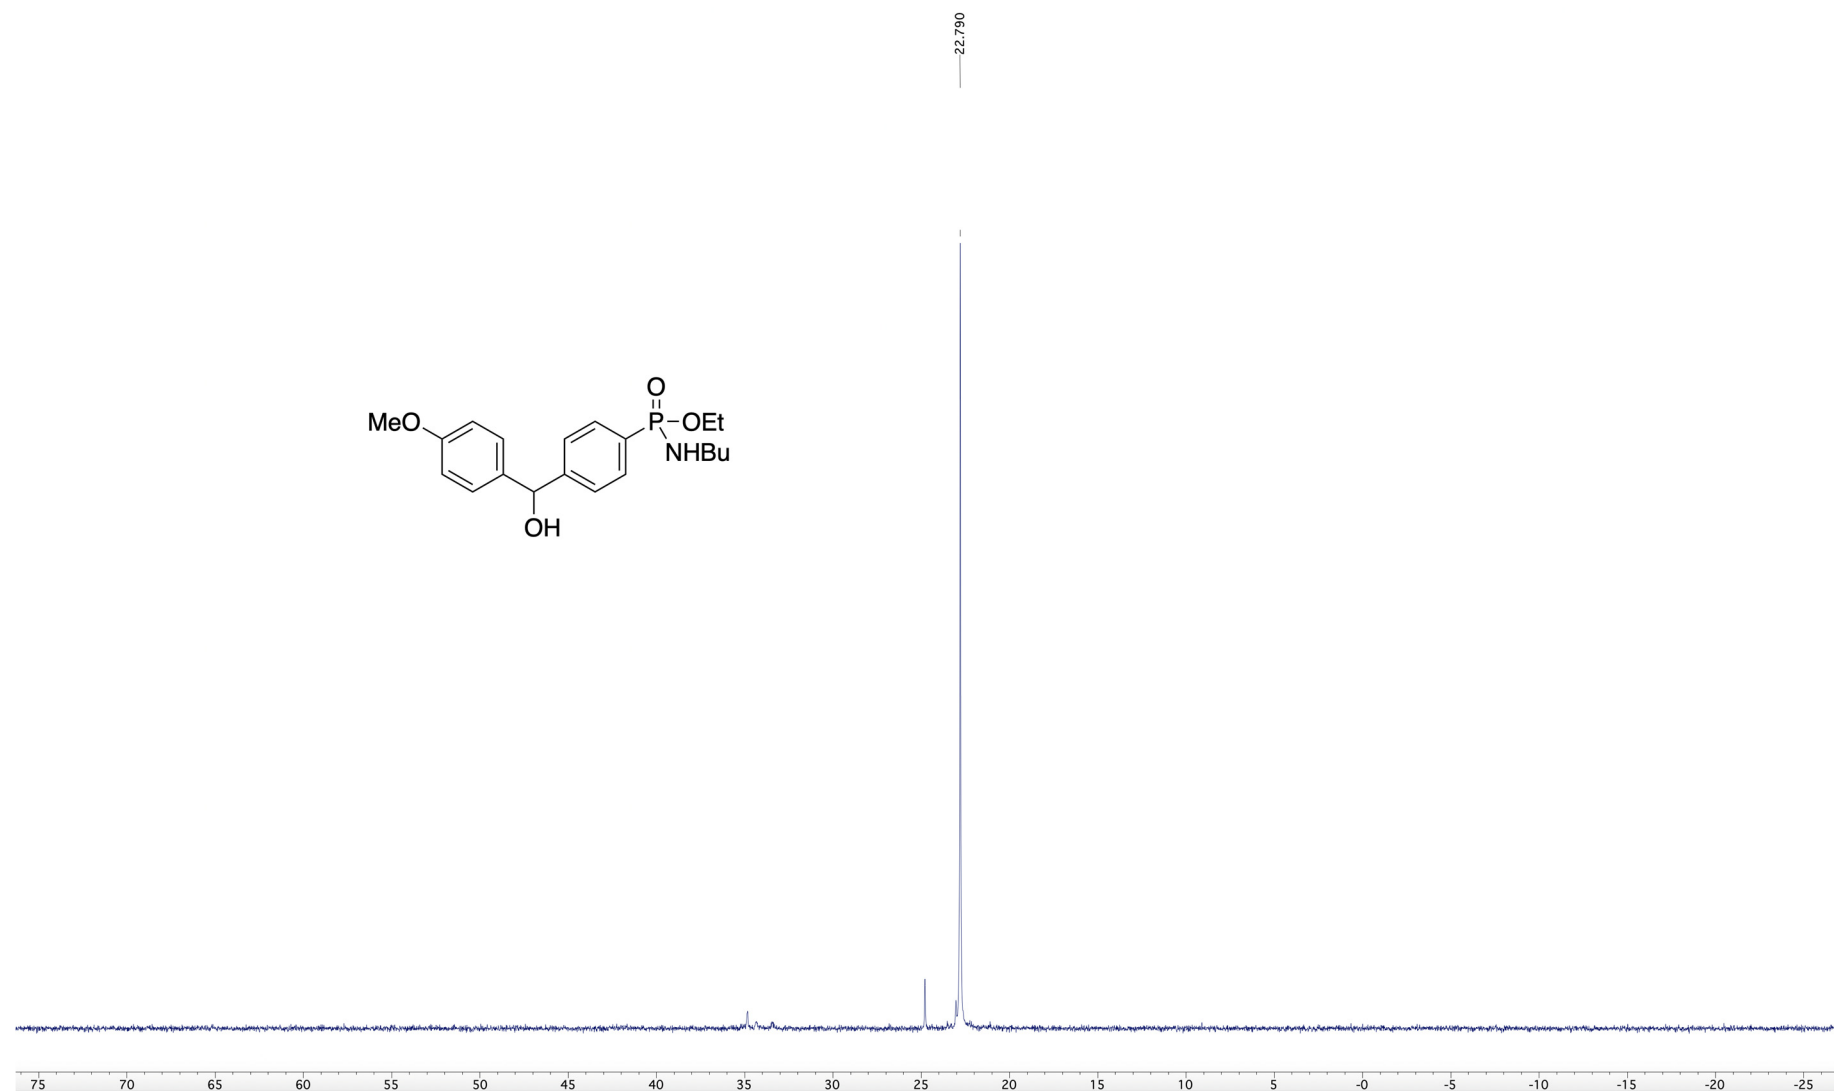

Figure S37. 100 MHz DEPTQ  $^{13}\text{C}$  NMR spectrum of **14b**

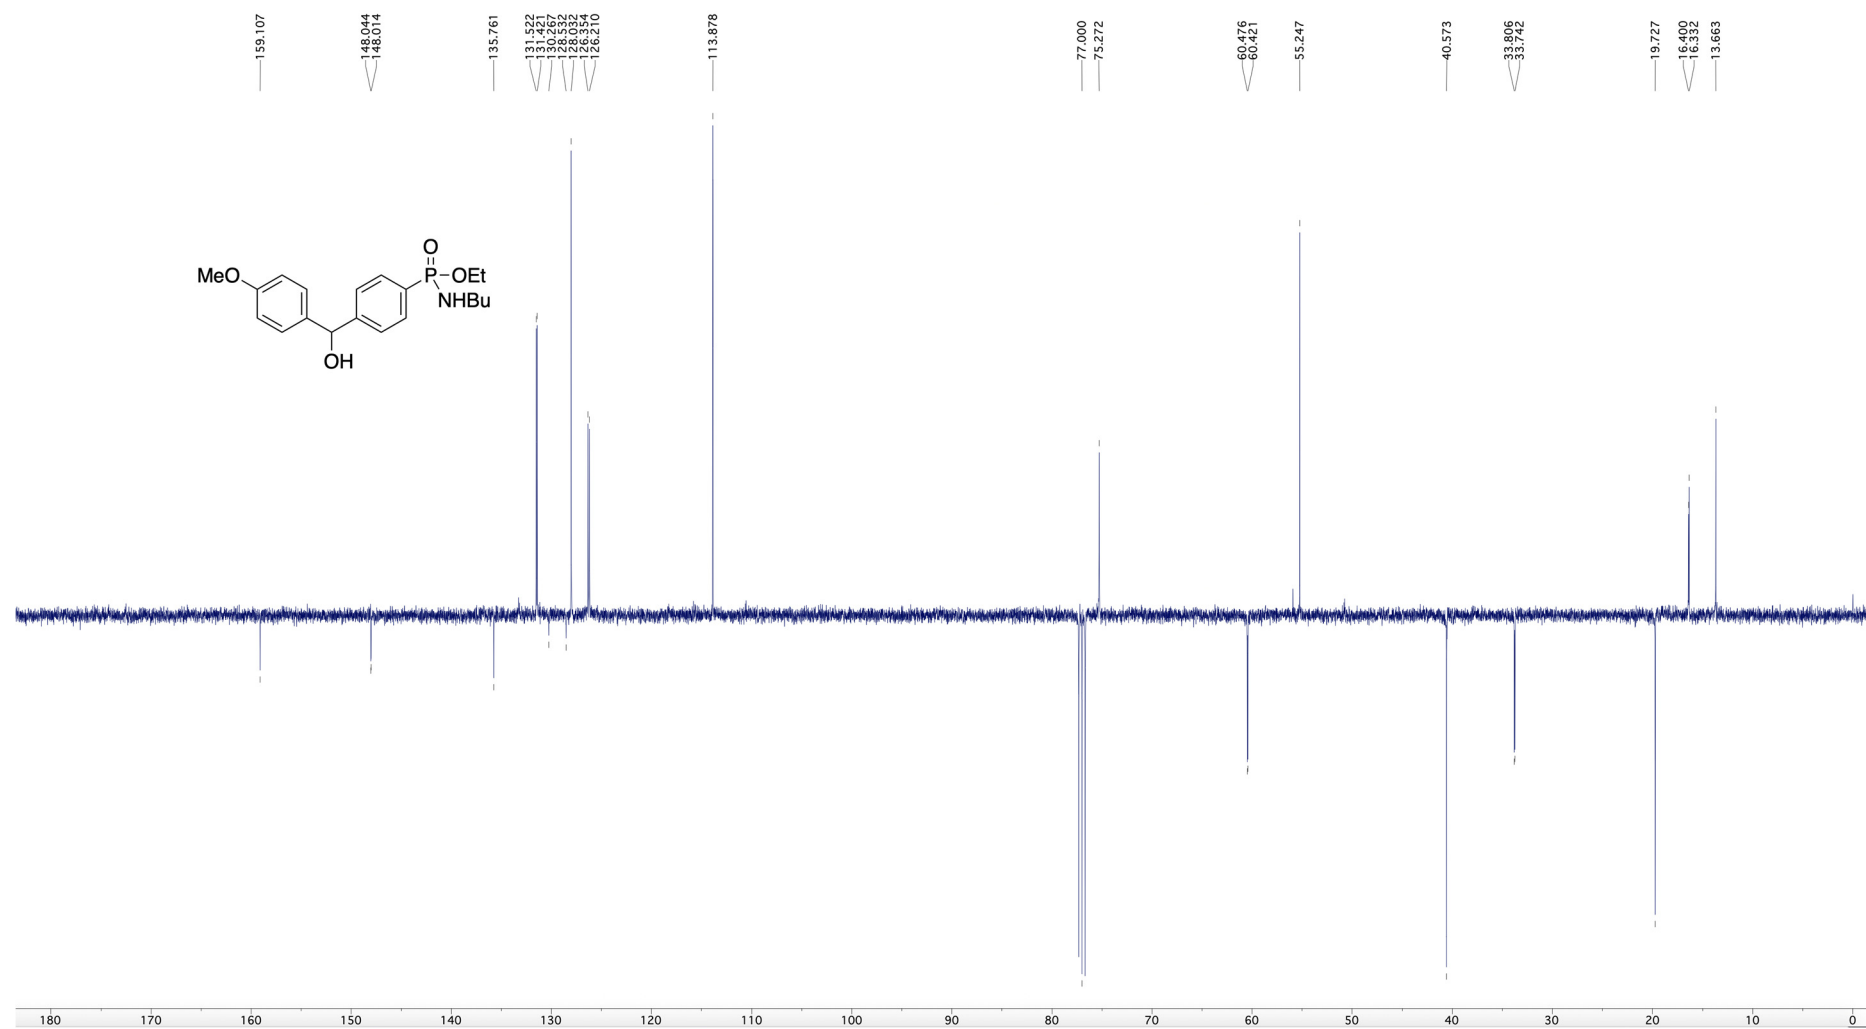

Figure S38. 400 MHz  $^1\text{H}$  NMR spectrum of **14c**

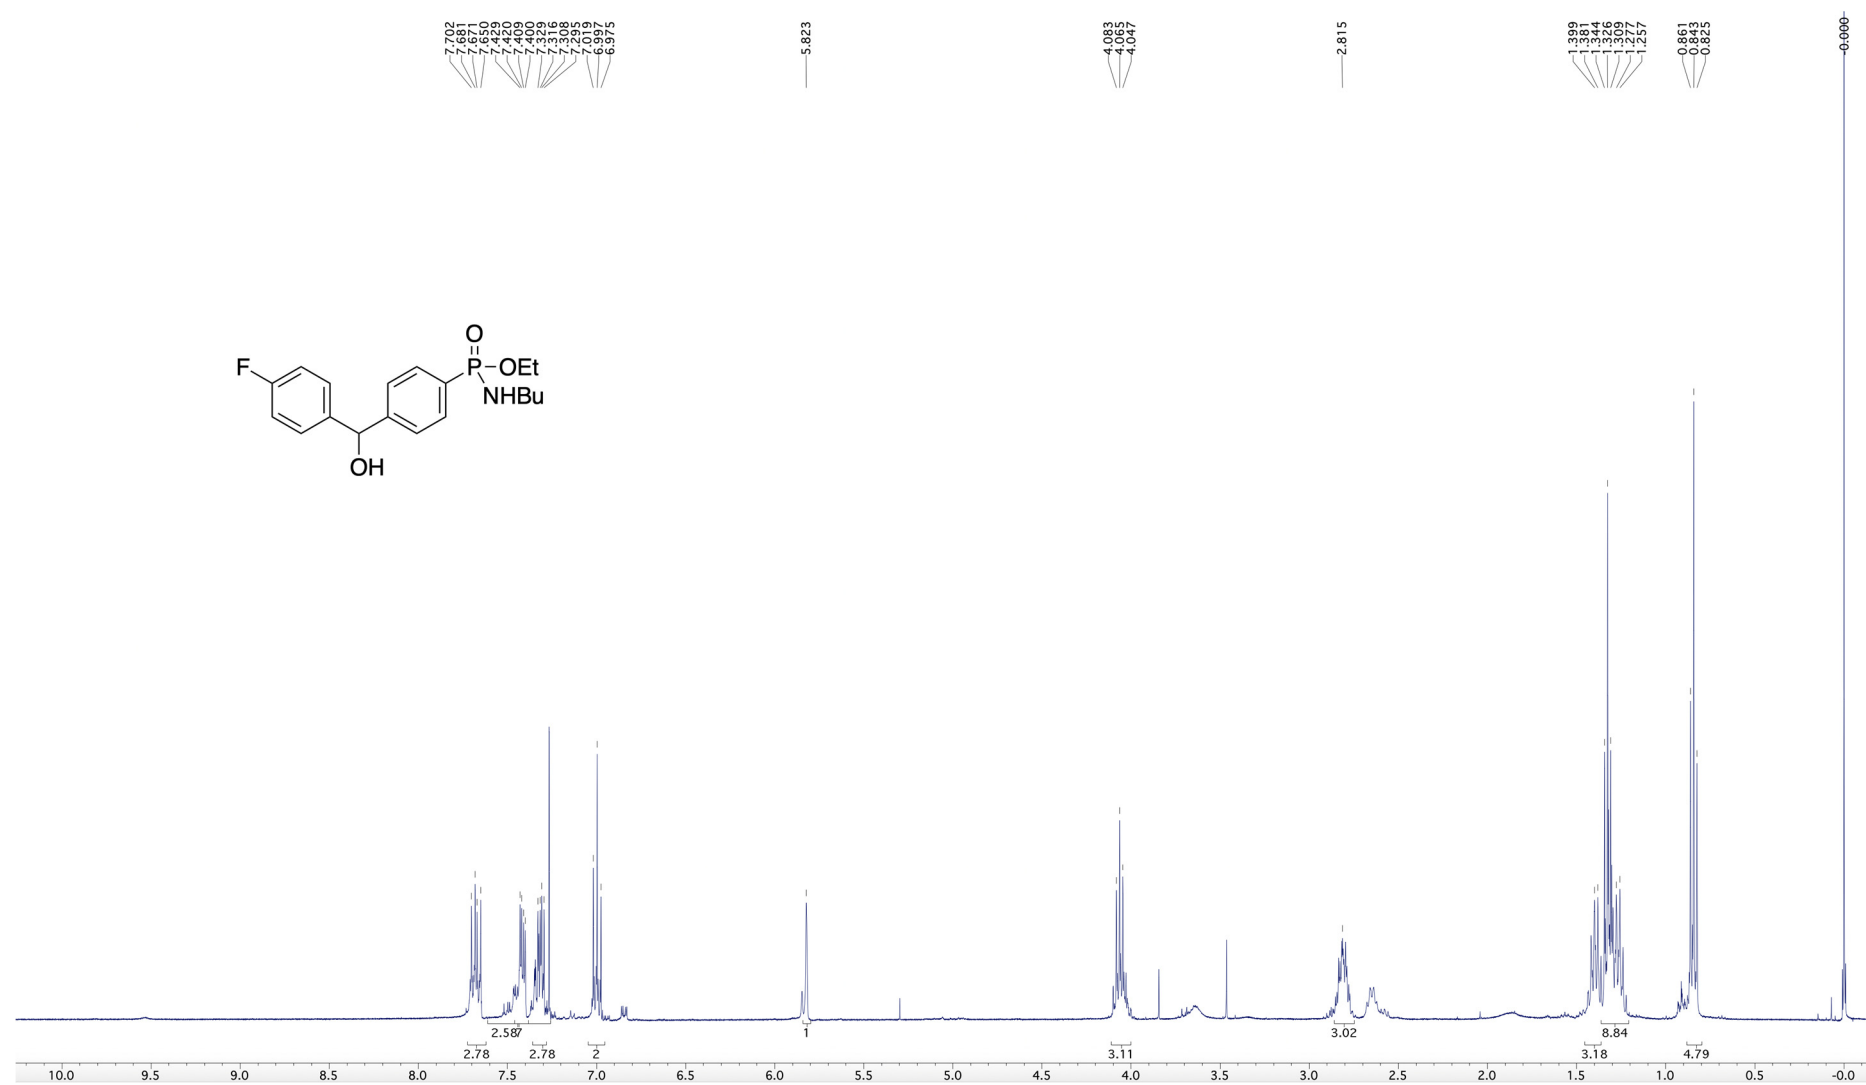

Figure S39. 376 MHz  $^{19}\text{F}$  NMR spectrum of **14c**

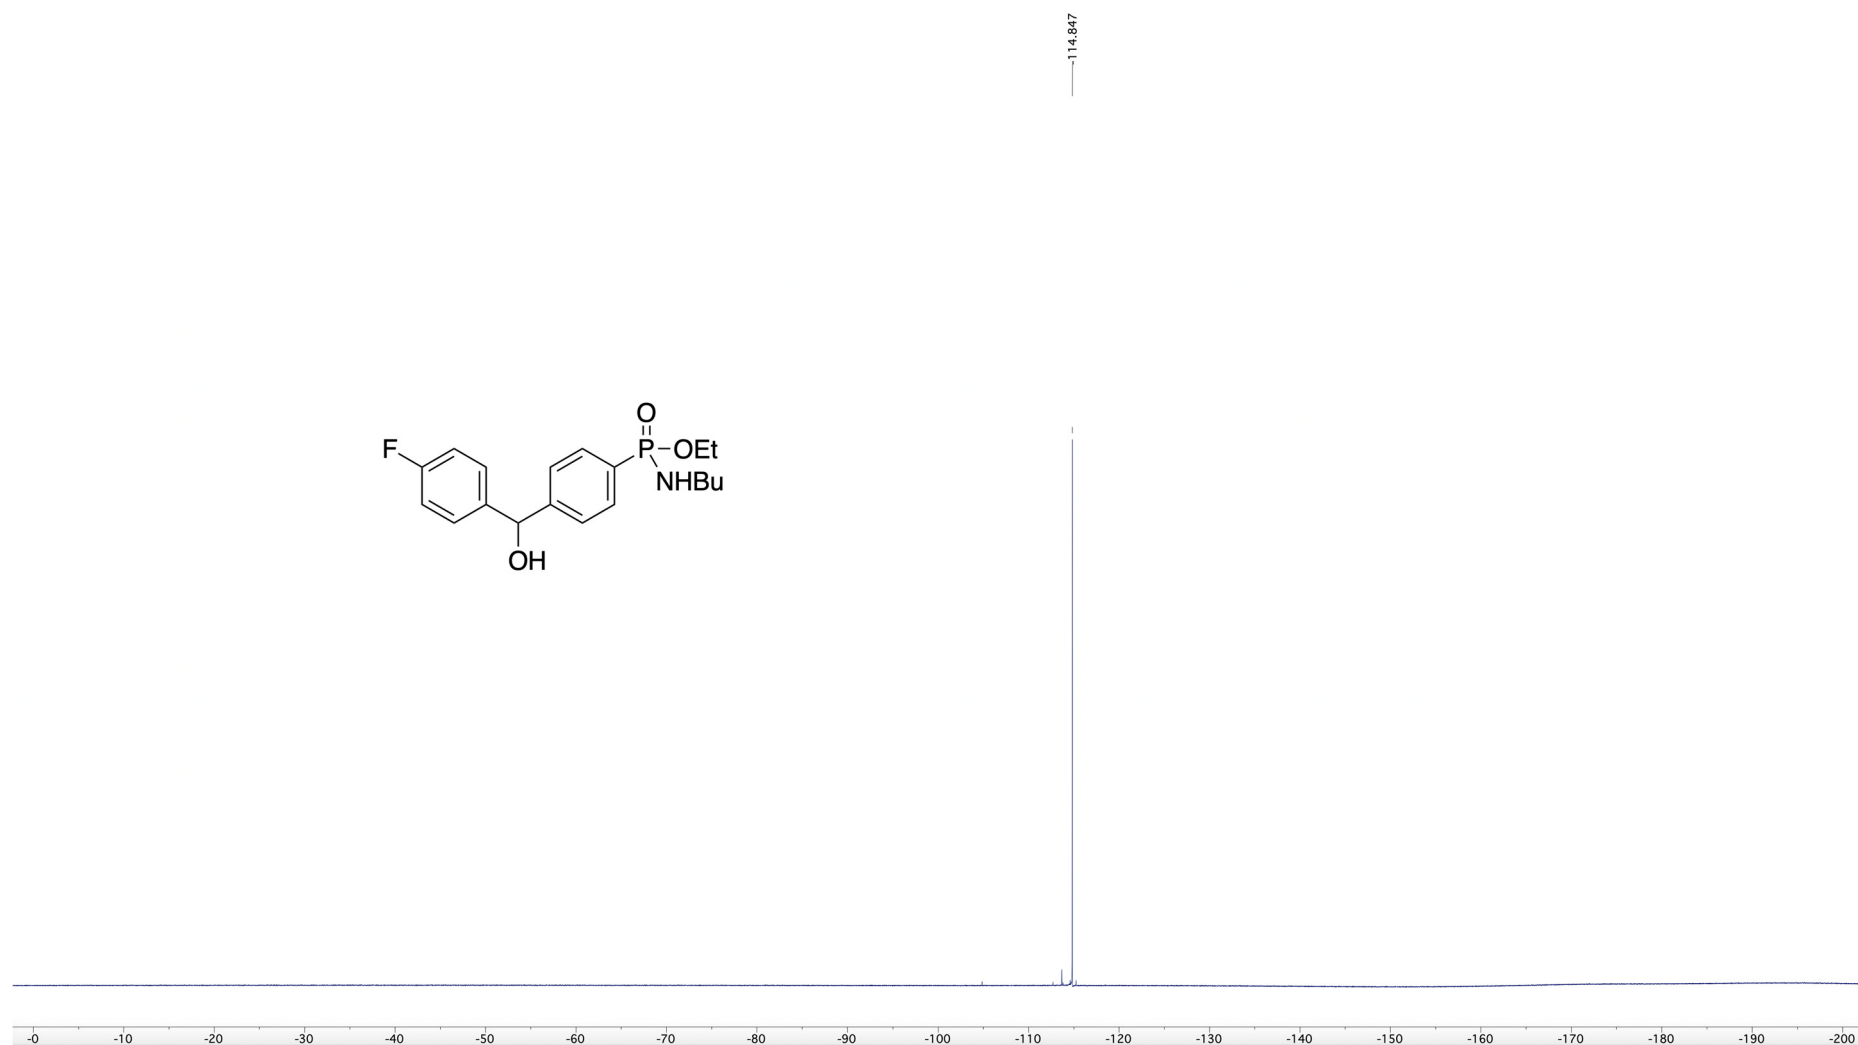

Figure S40. 162 MHz  $^{31}\text{P}$  NMR spectrum of **14c**

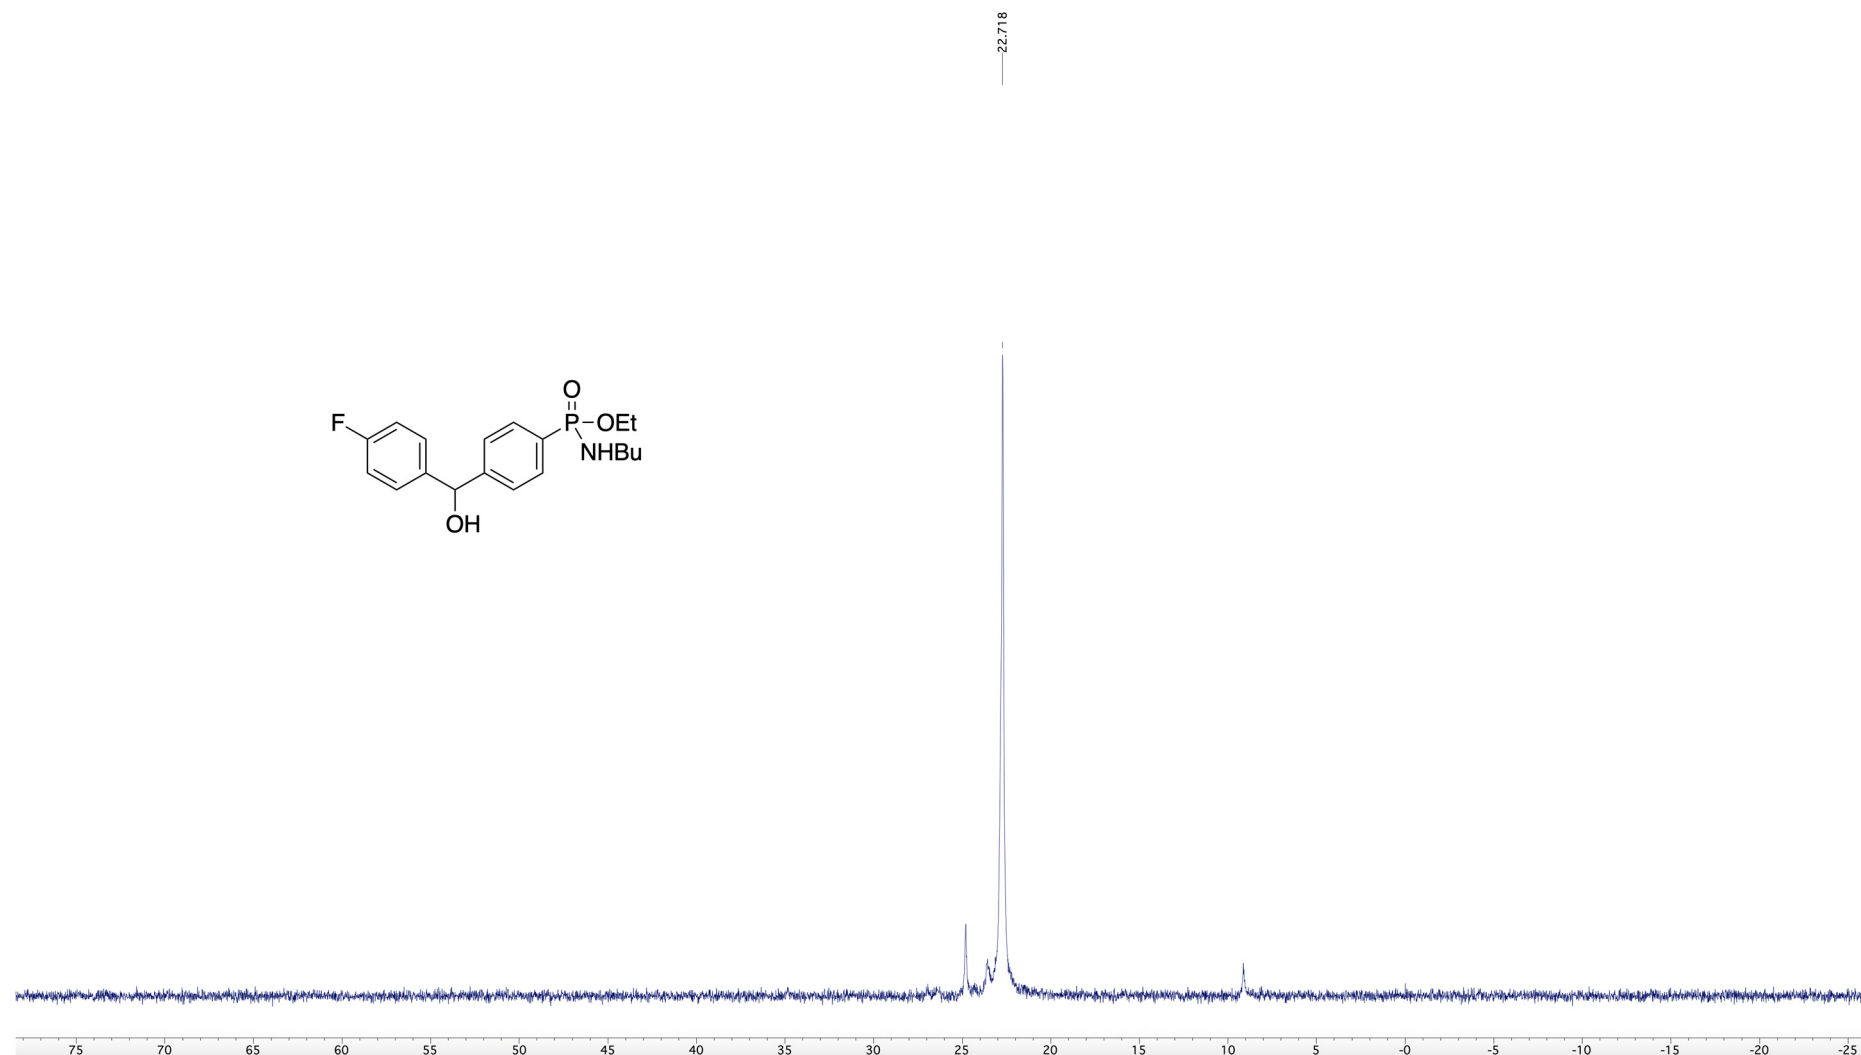

Figure S41. 125 MHz DEPTQ  $^{13}\text{C}$  NMR spectrum of **14c**

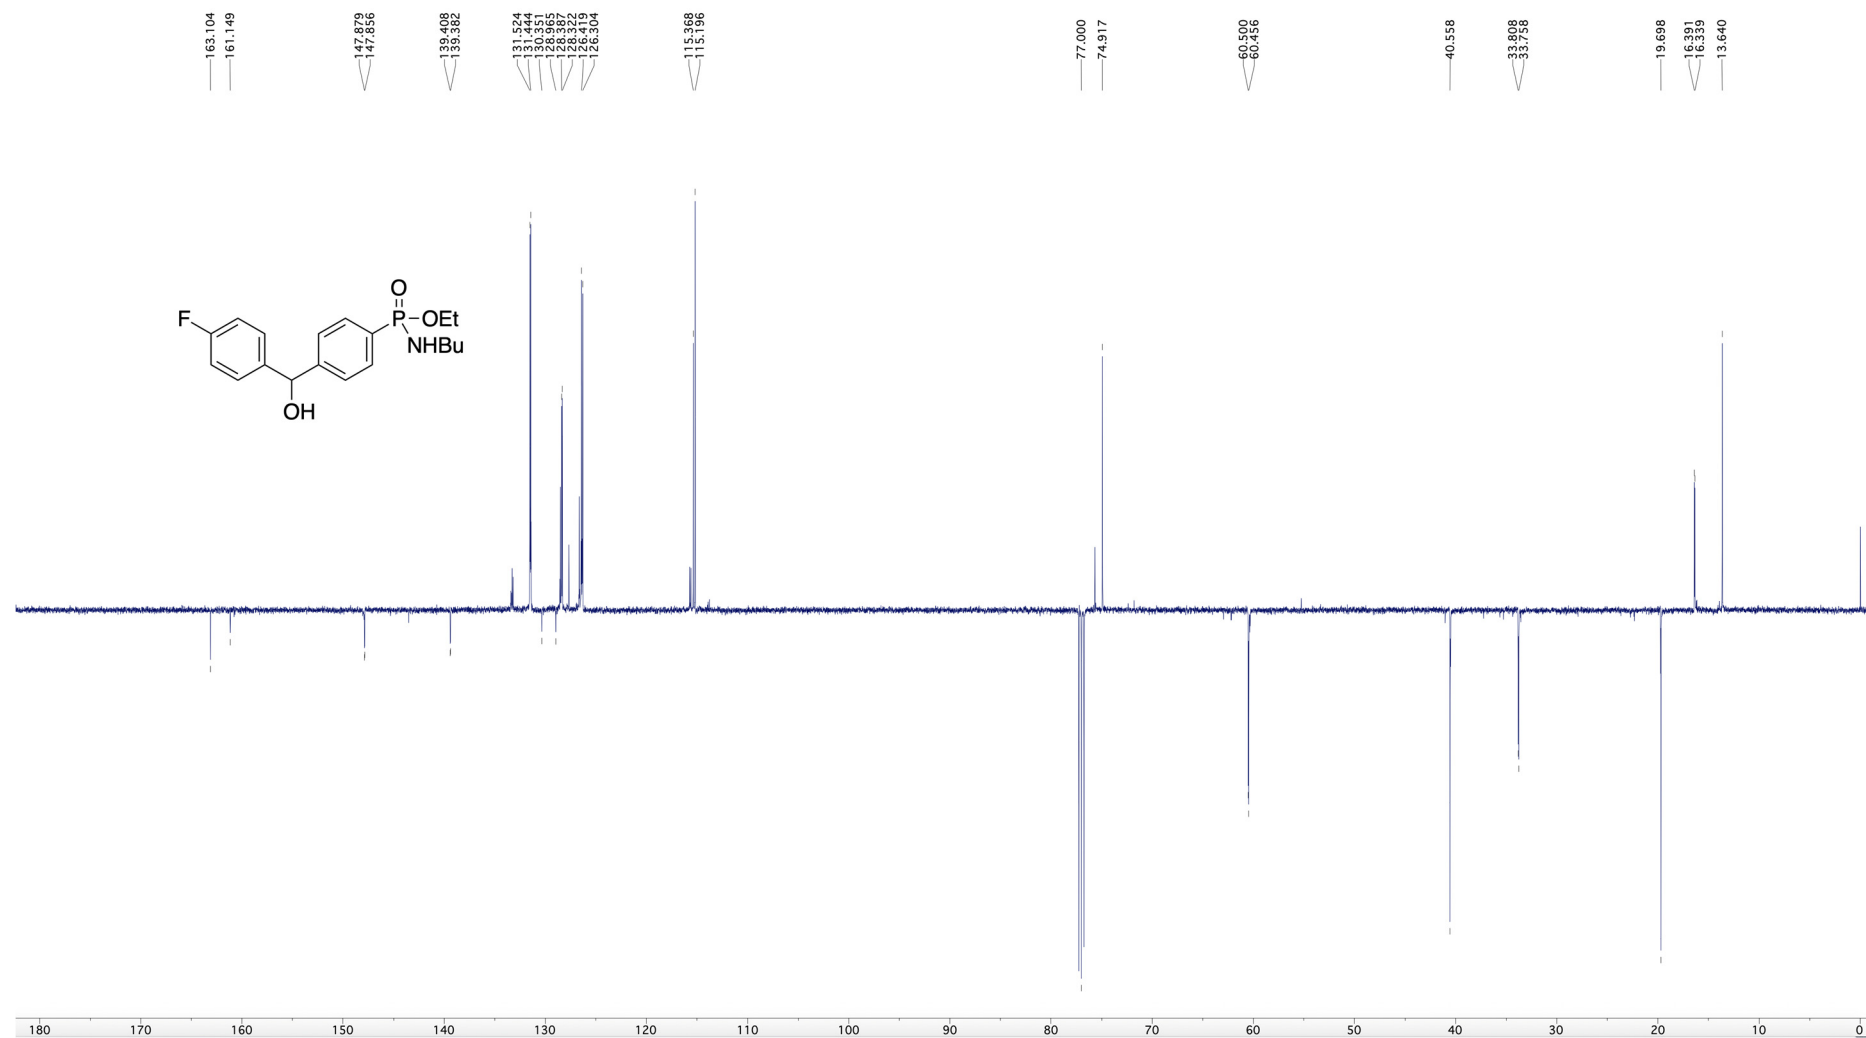

Figure S42. 300 MHz  $^1\text{H}$  NMR spectrum of **14d**

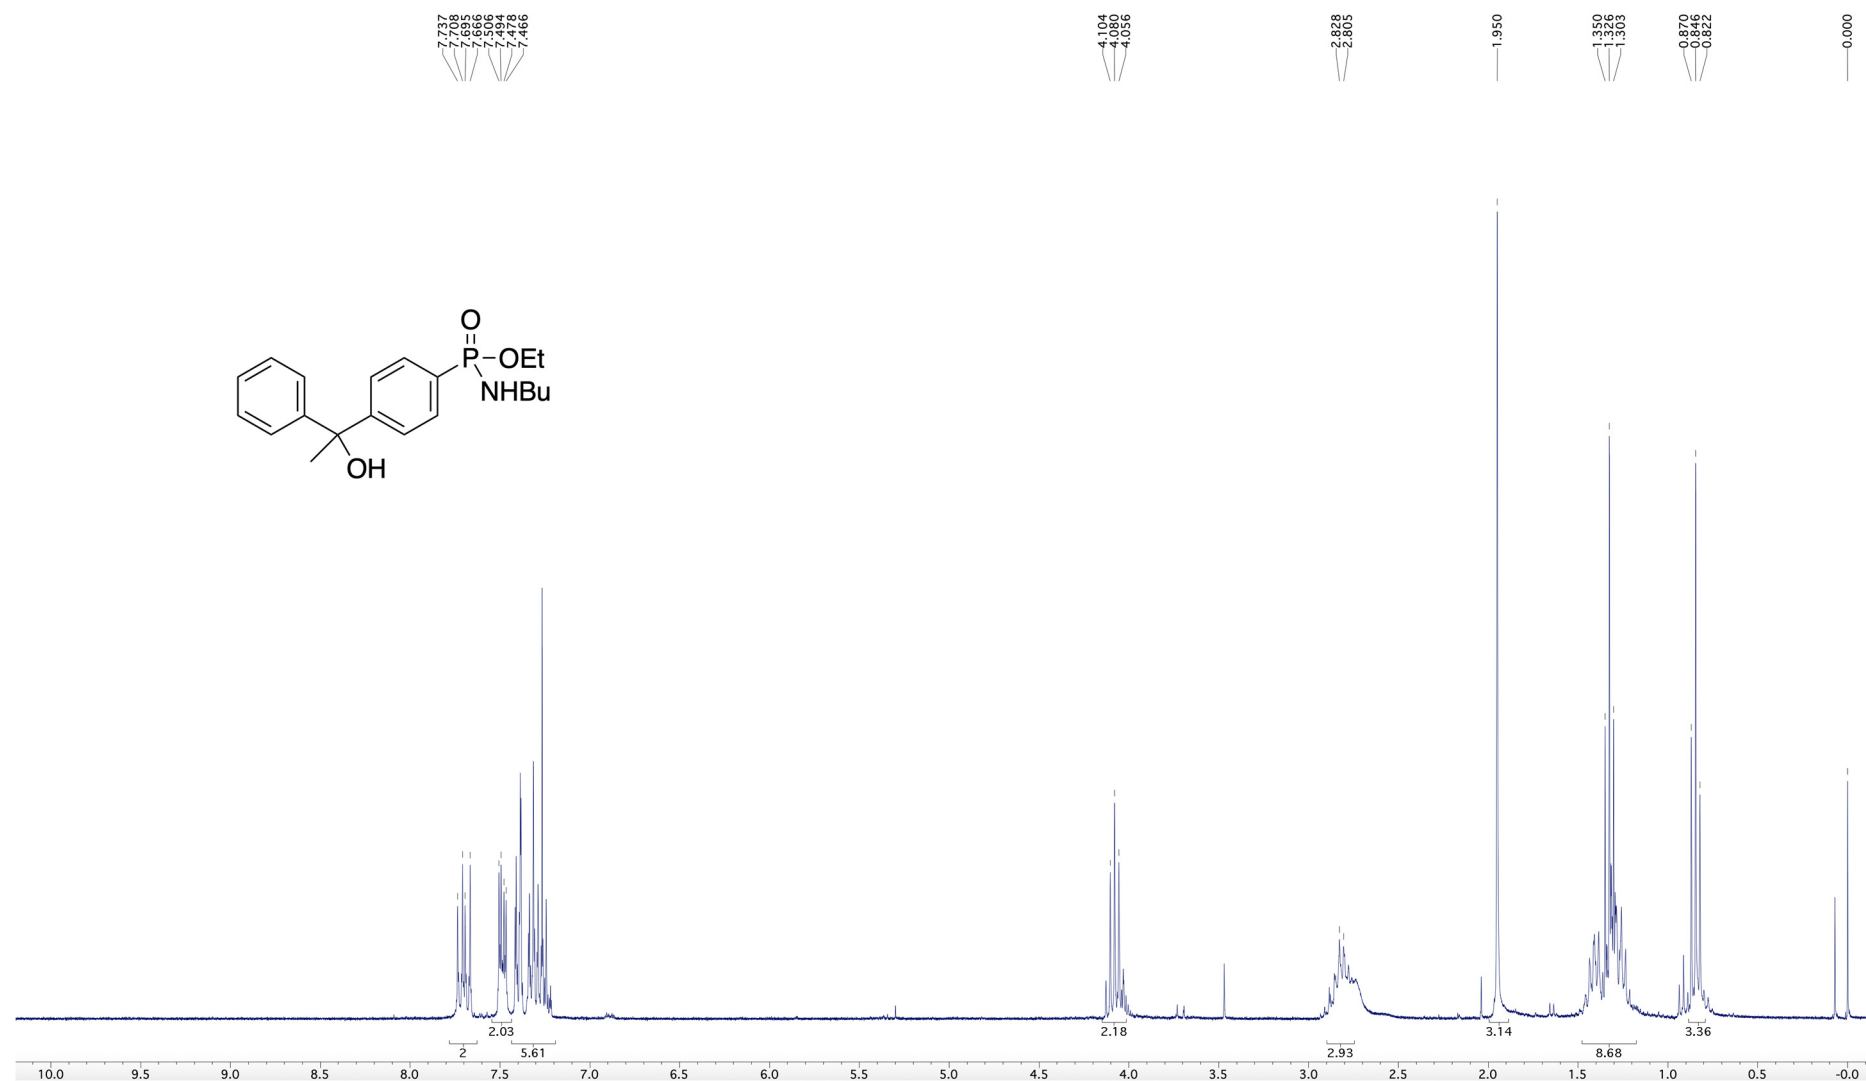



Figure S43. 162 MHz  $^{31}\text{P}$  NMR spectrum of **14d**

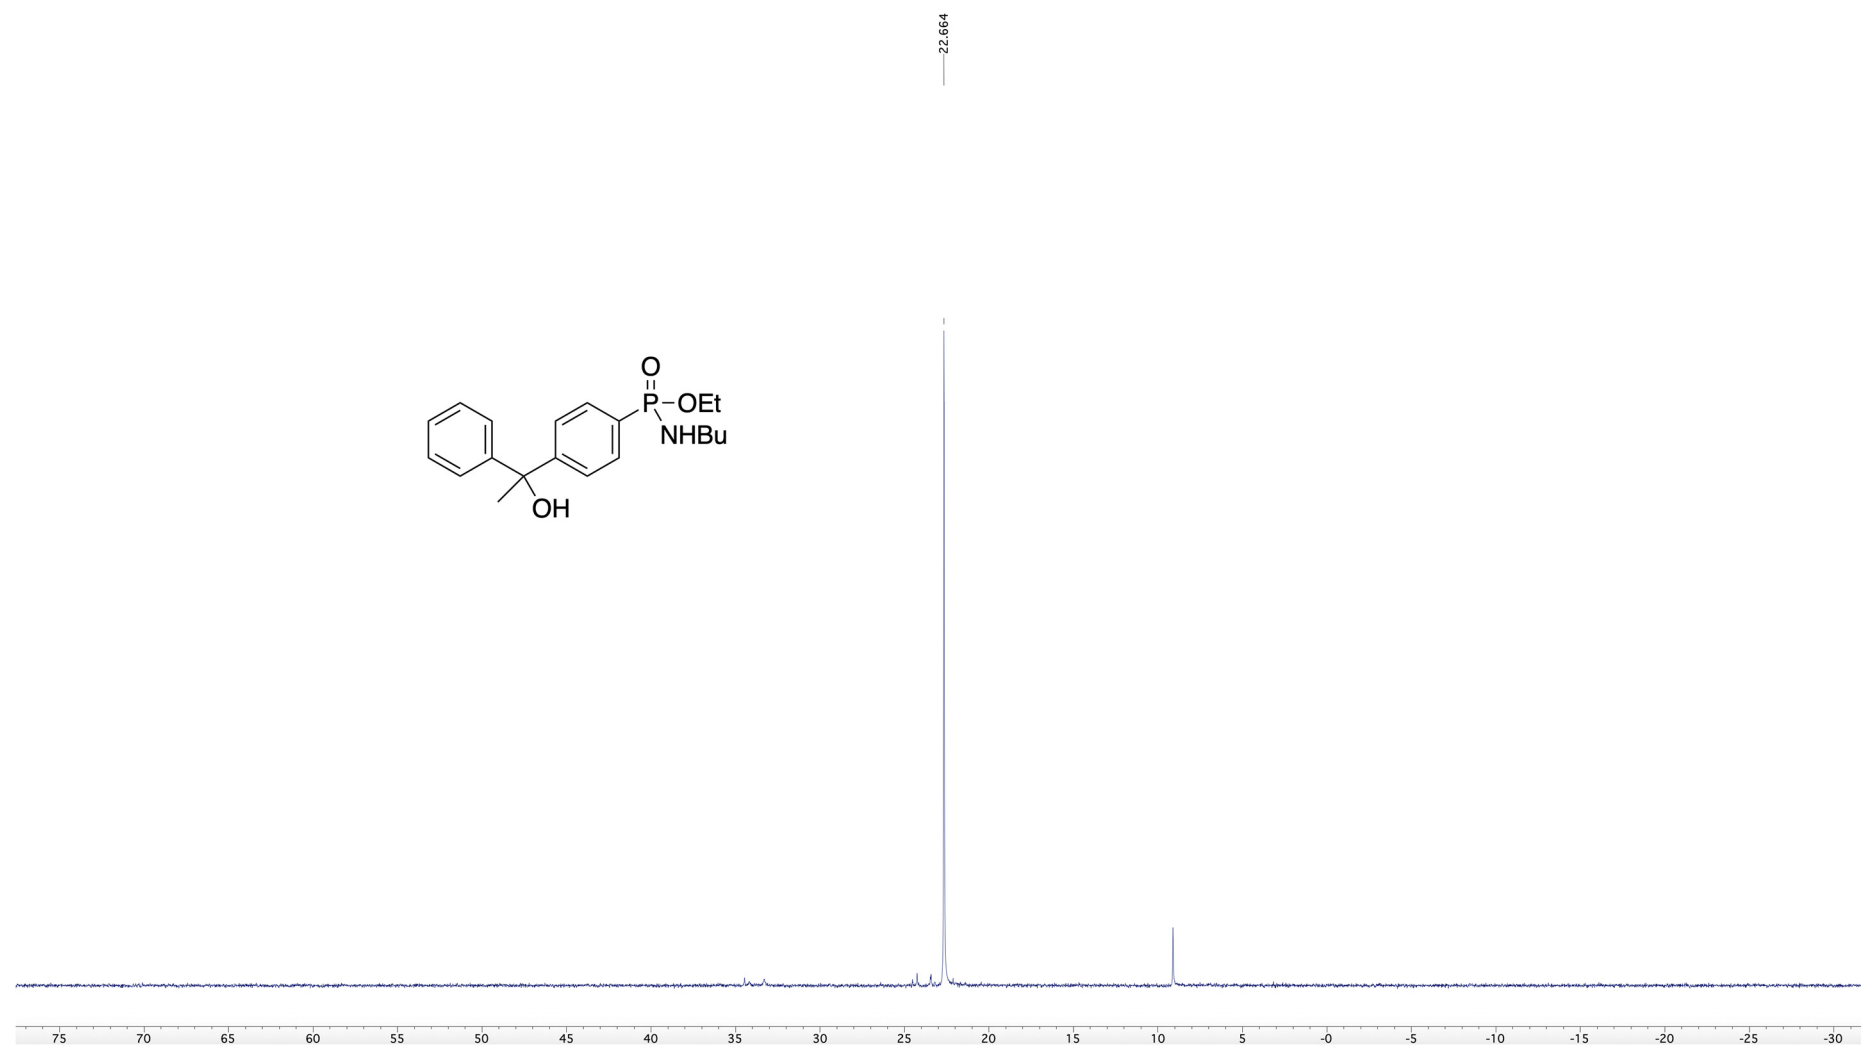

Chemical structure: CCOP(=O)(c1ccc(cc1)C(C)(O)c2ccccc2)N

<sup>13</sup>C NMR peaks (ppm):

| Peak (ppm)                                                                      | Assignment                |
|---------------------------------------------------------------------------------|---------------------------|
| 151.885, 151.884                                                                | Aromatic C-O              |
| 147.365                                                                         | Aromatic C-O              |
| 131.314, 130.713, 130.673, 129.399, 129.323, 129.291, 128.991, 128.930, 128.748 | Aromatic C                |
| 77.000, 76.999, 76.999                                                          | CDCl <sub>3</sub> solvent |
| 68.494, 68.377                                                                  | CH-OH                     |
| 40.588                                                                          | CH <sub>3</sub> -P        |
| 33.848, 33.785                                                                  | CH <sub>2</sub> -P        |
| 30.620                                                                          | CH <sub>3</sub> -P        |
| 19.724                                                                          | CH <sub>3</sub> -N        |
| 16.425, 16.355                                                                  | CH <sub>2</sub> -N        |
| 13.662                                                                          | CH <sub>3</sub> -N        |

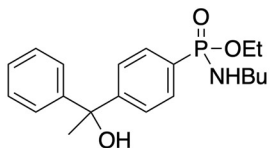

Figure S46. 400 MHz  $^1\text{H}$  NMR spectrum of **16**

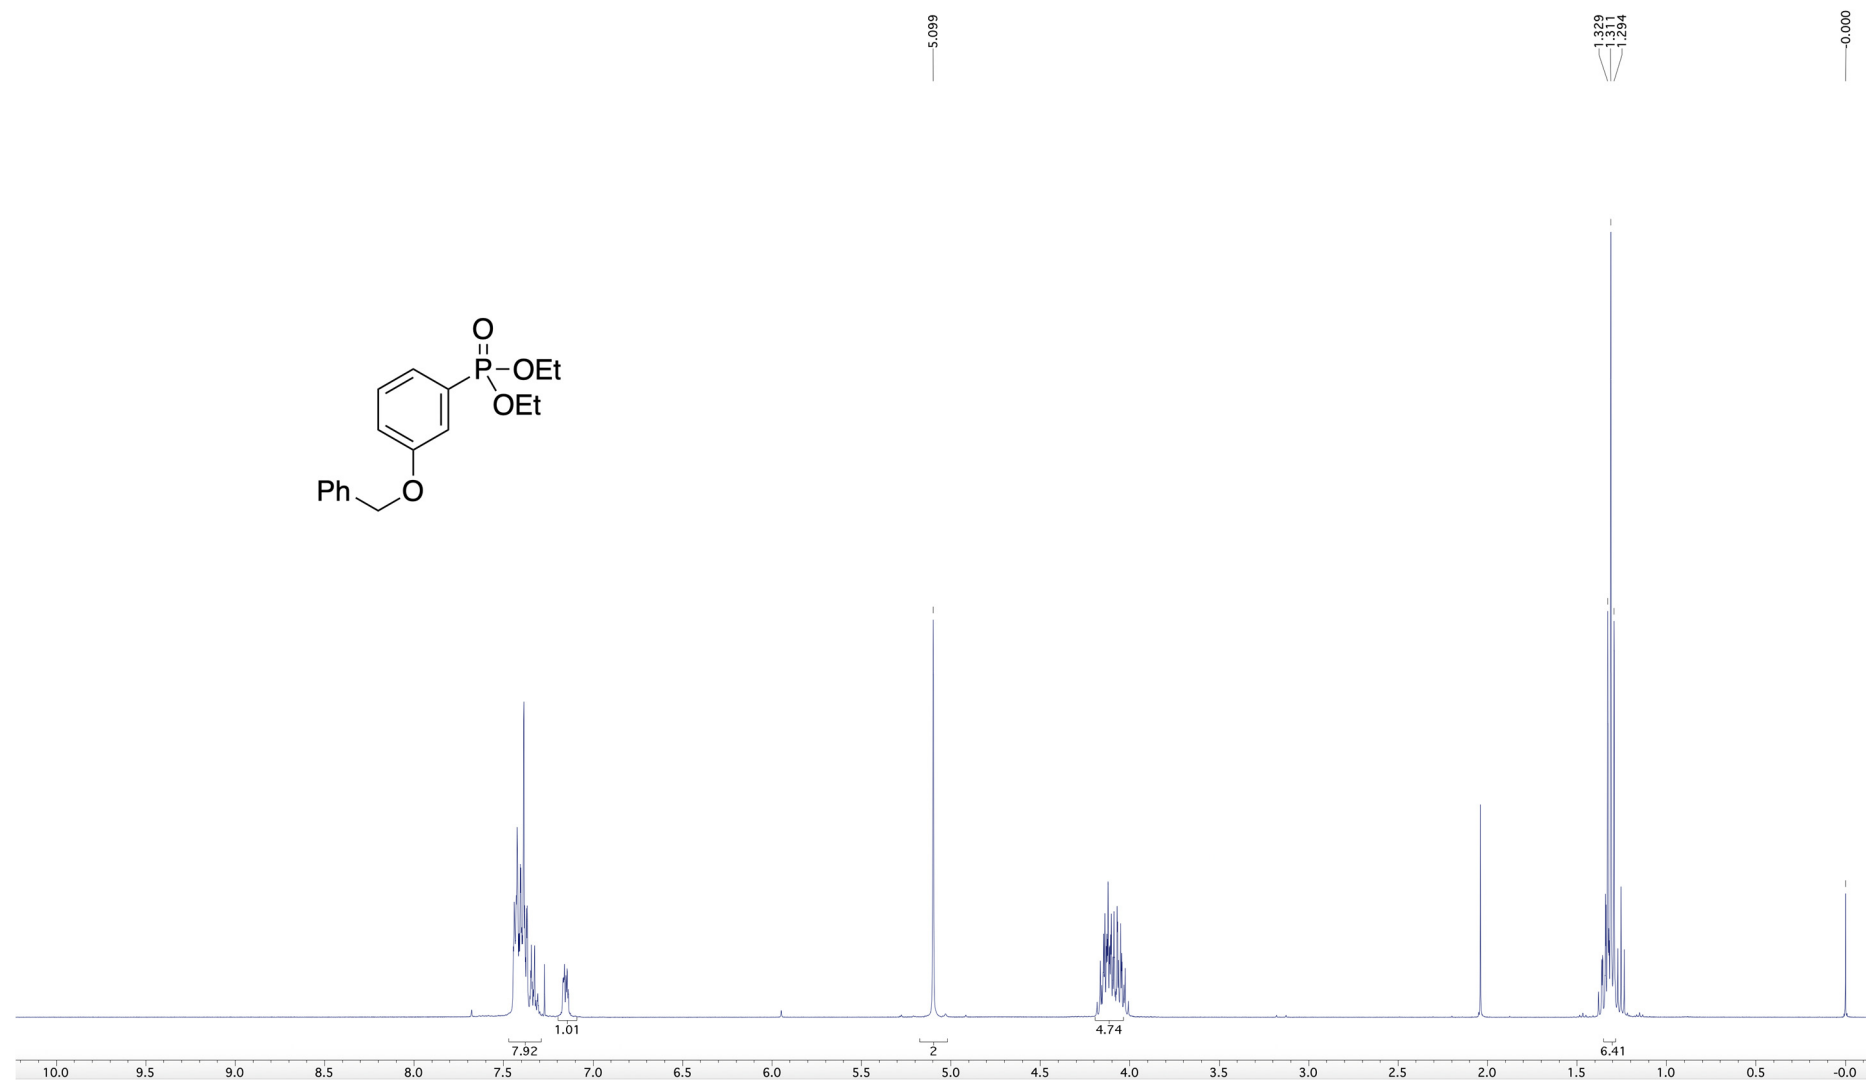

Figure S45. 162 MHz  $^{31}\text{P}$  NMR spectrum of **16**

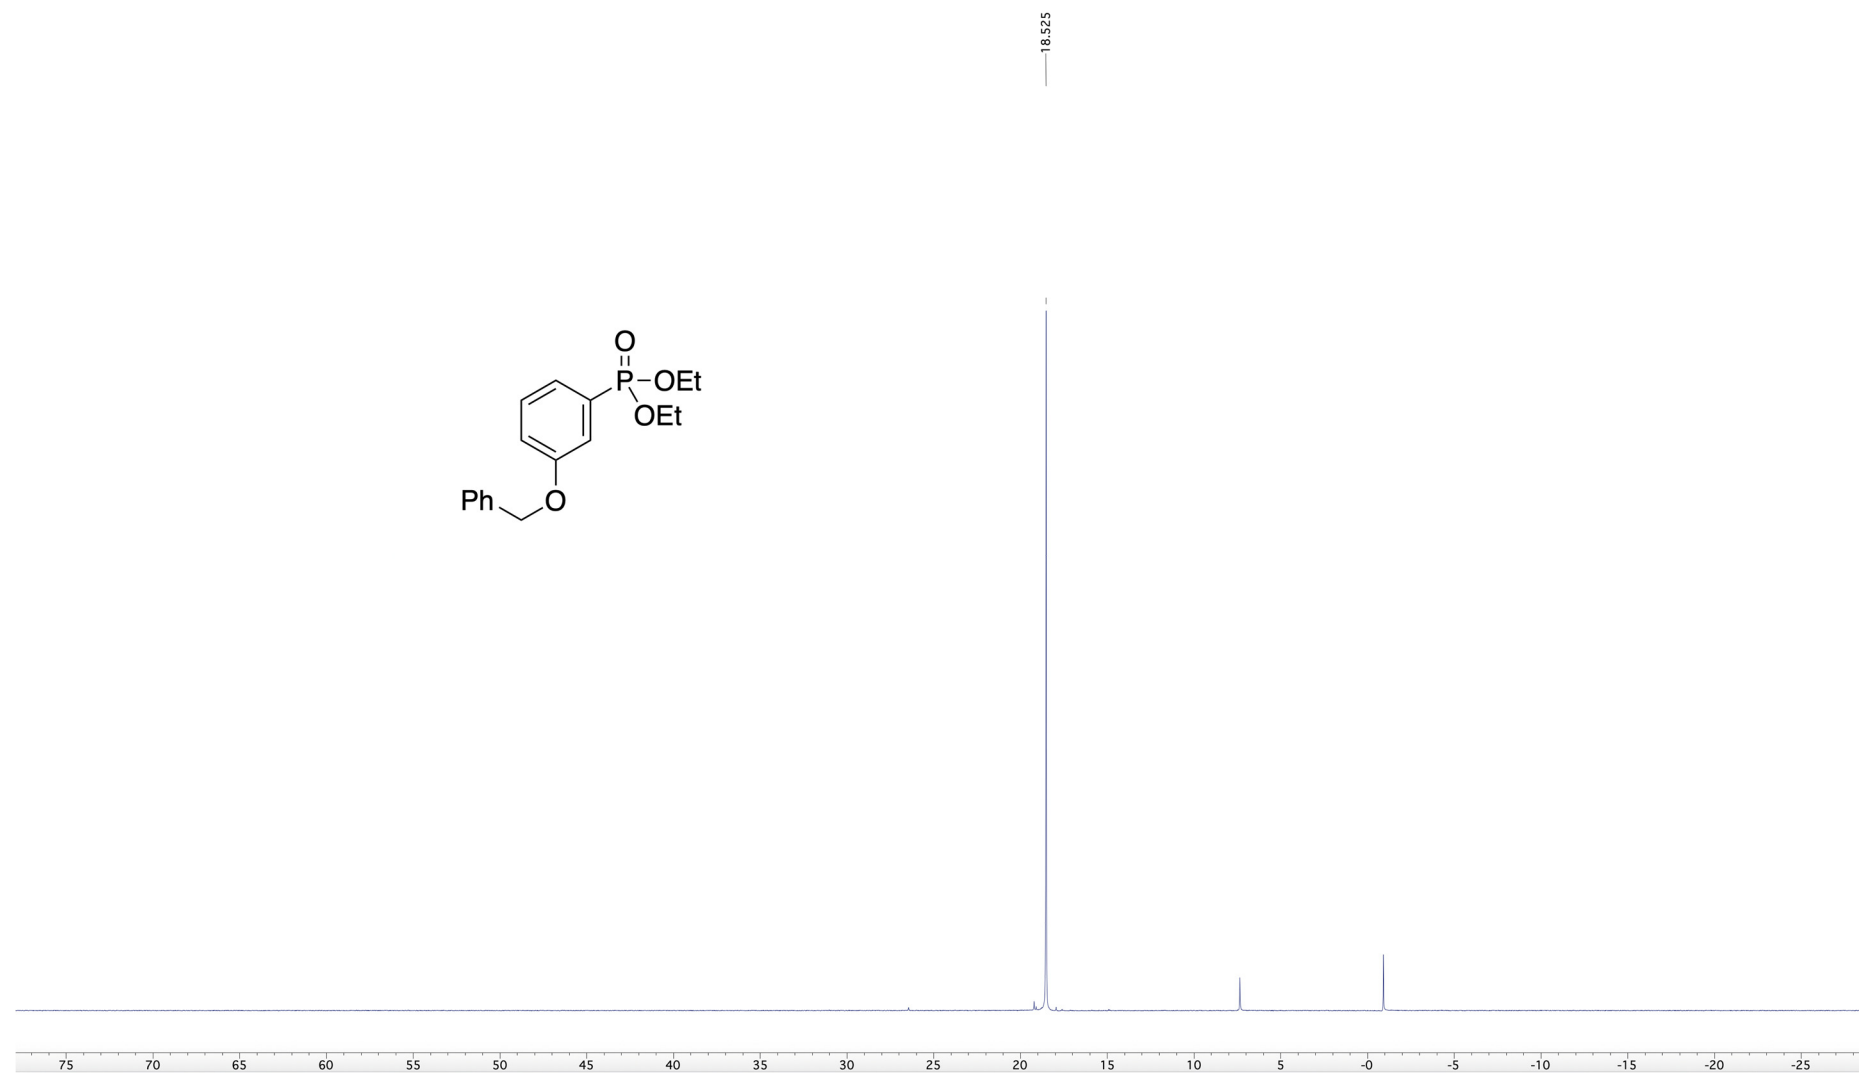

Figure S47. 125 MHz DEPTQ  $^{13}\text{C}$  NMR spectrum of **16**

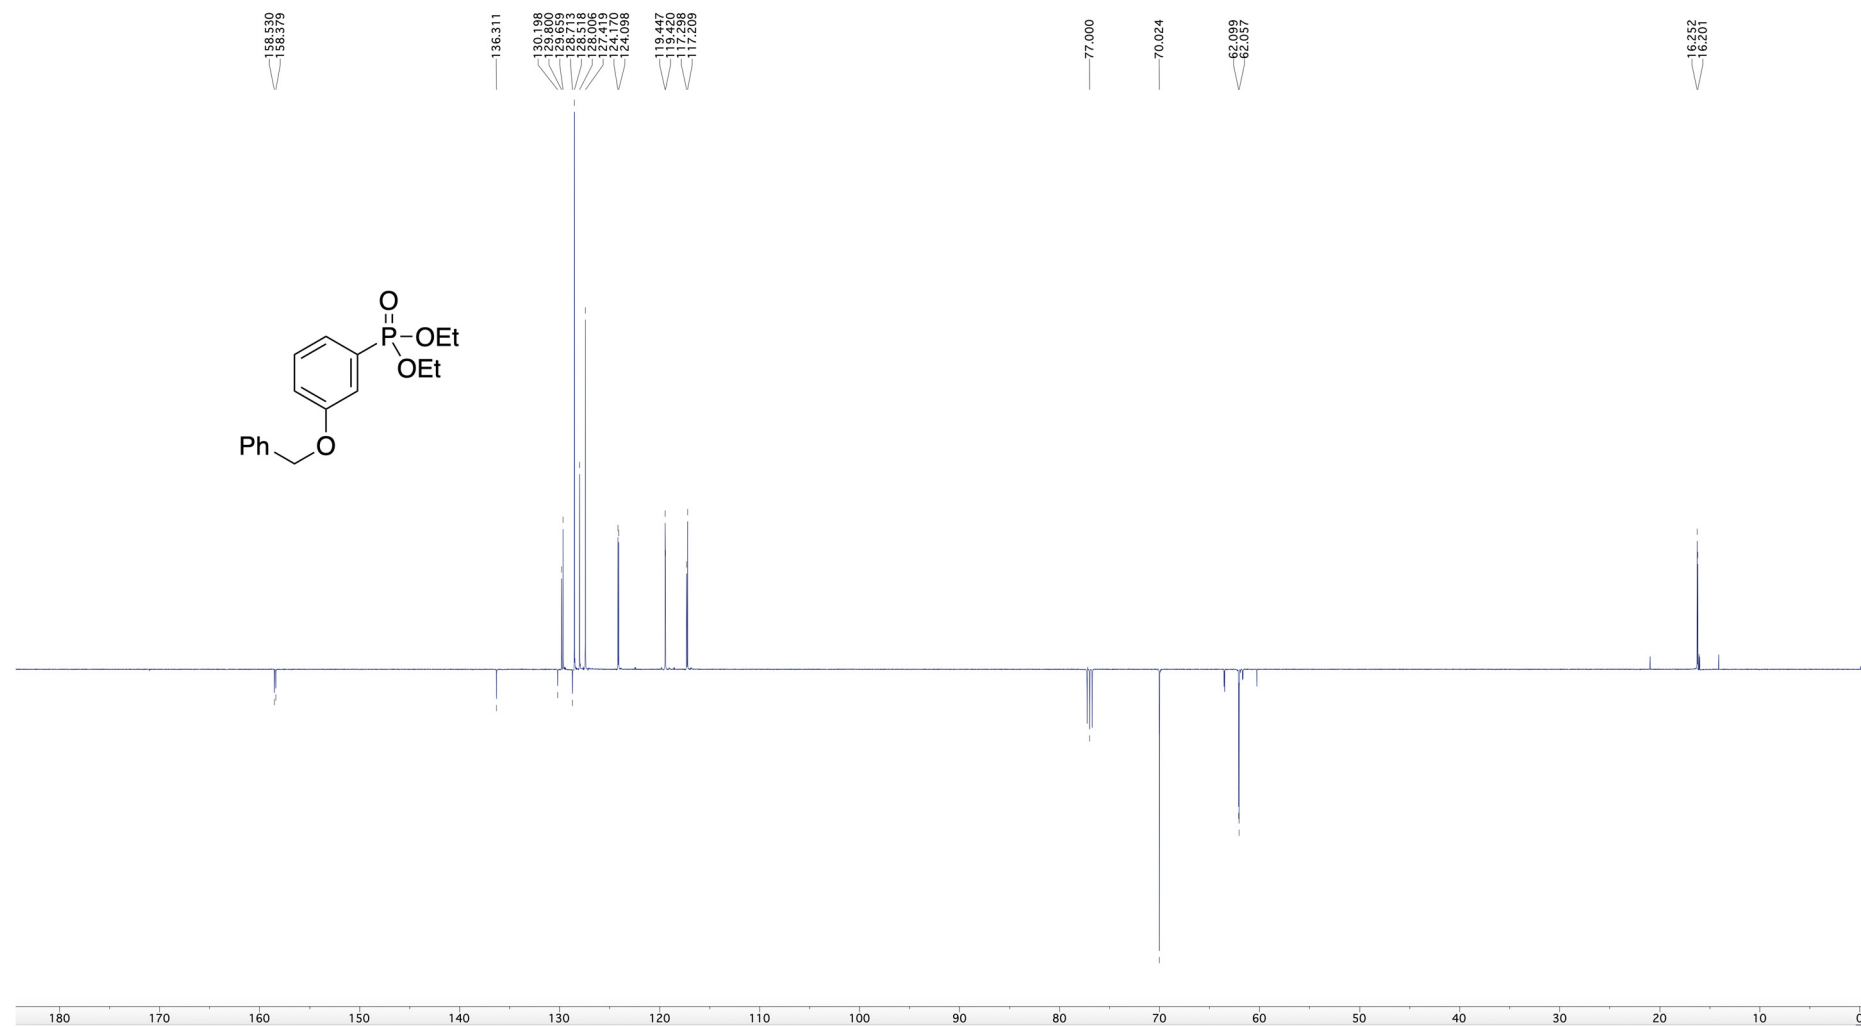

Figure S48. 400 MHz  $^1\text{H}$  NMR spectrum of **17**

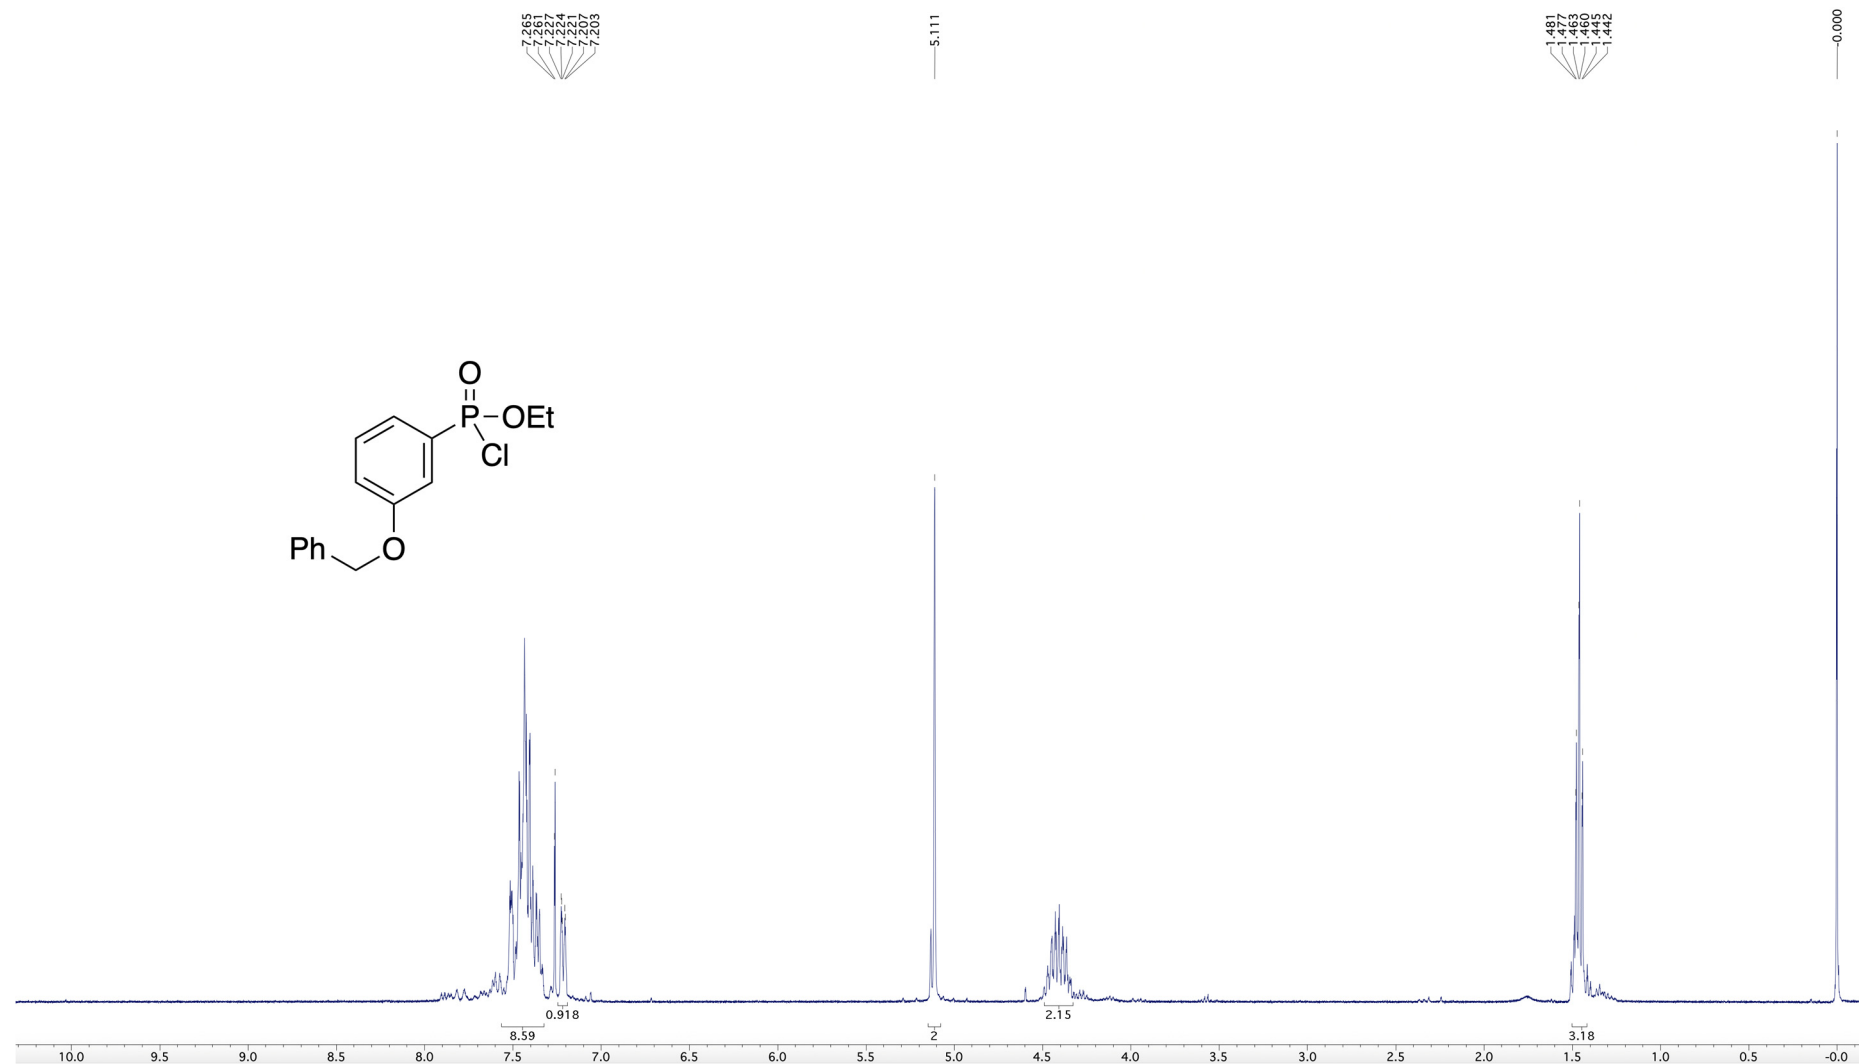

Figure S49. 162 MHz  $^{31}\text{P}$  NMR spectrum of **17**

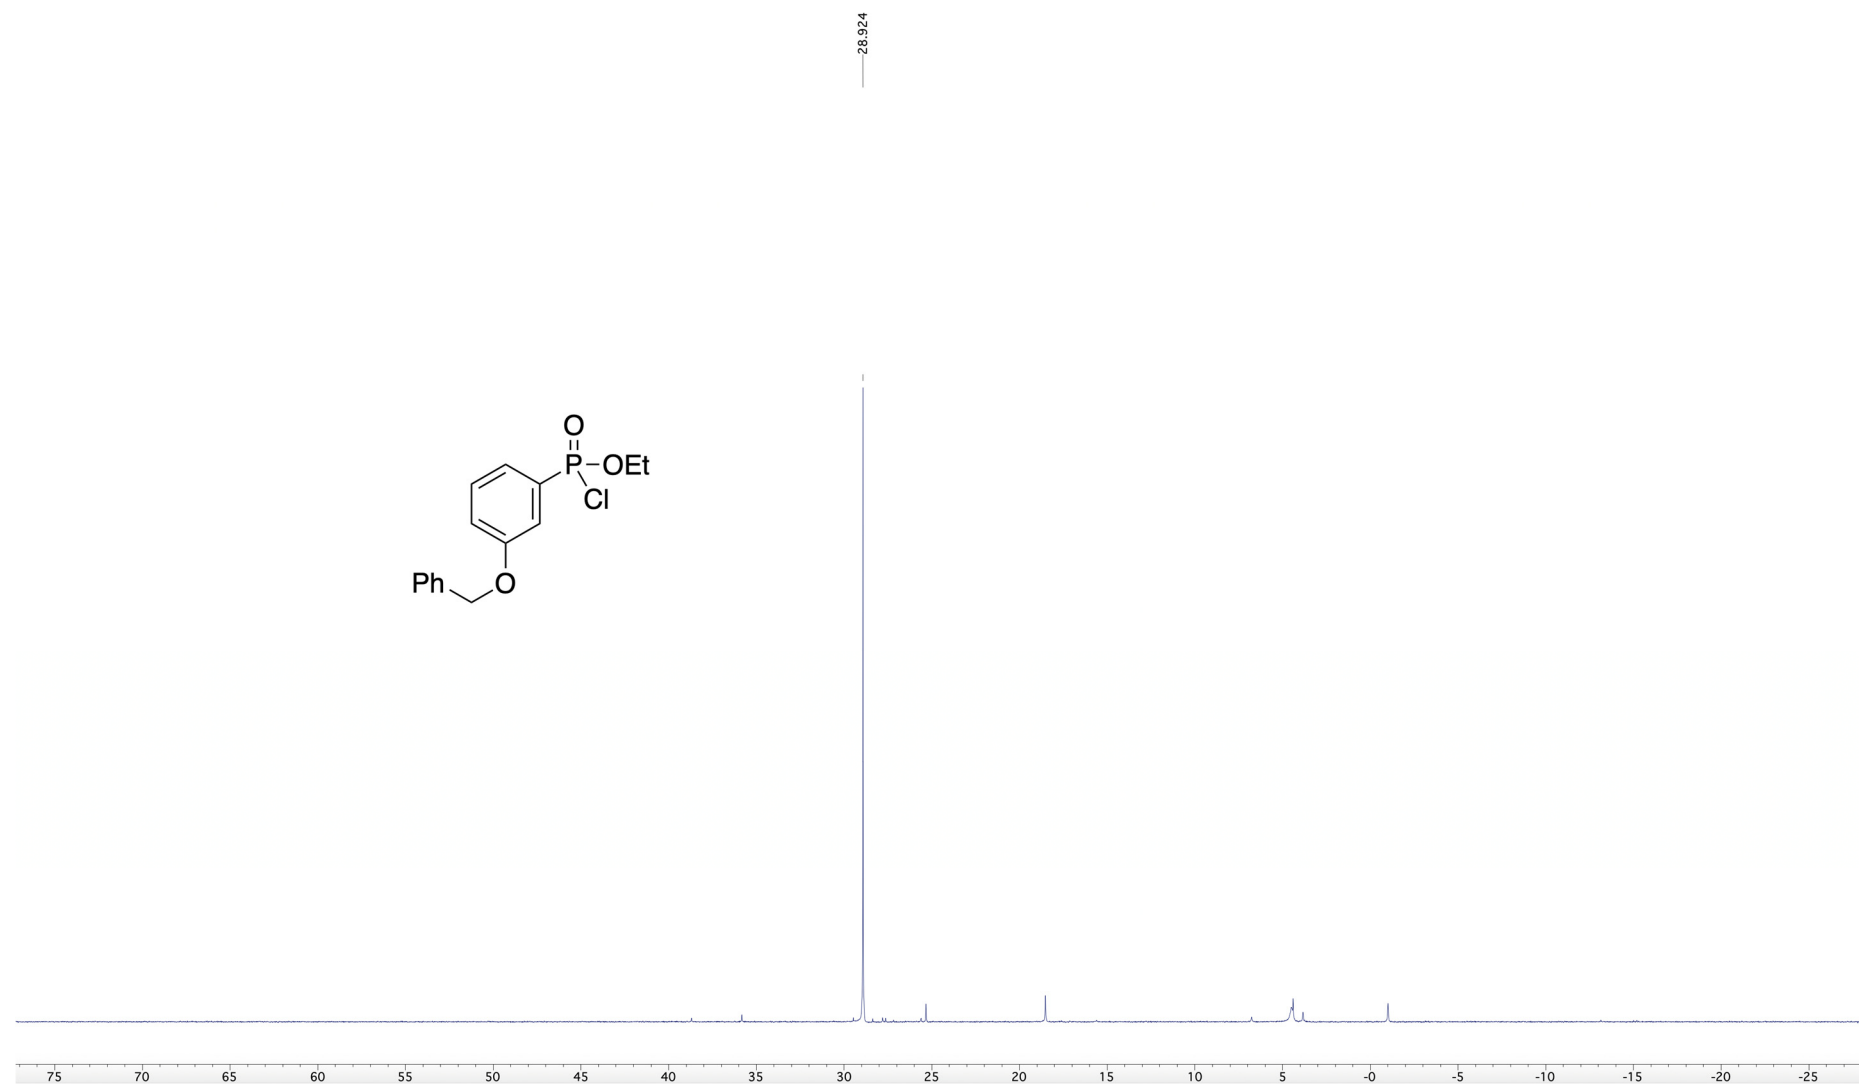

Figure S50. 100 MHz DEPTQ  $^{13}\text{C}$  NMR spectrum of **17**

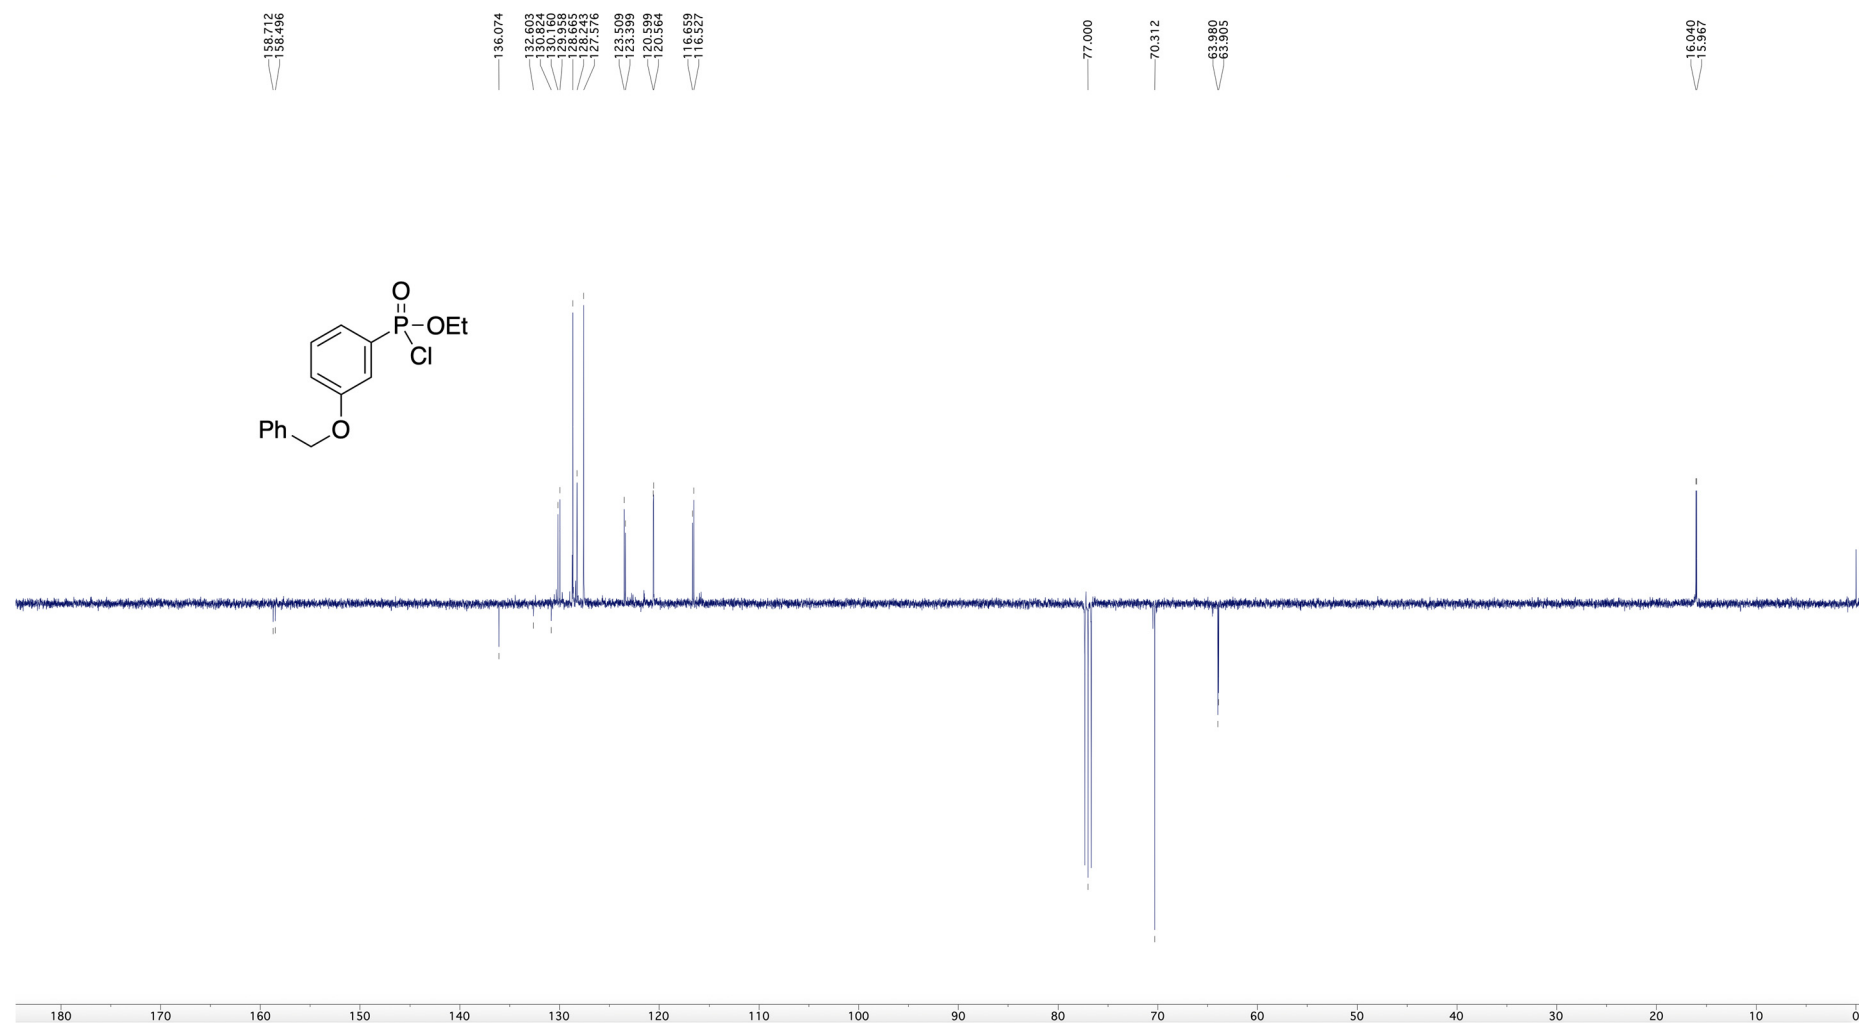



Figure S51. 400 MHz  $^1\text{H}$  NMR spectrum of **18**

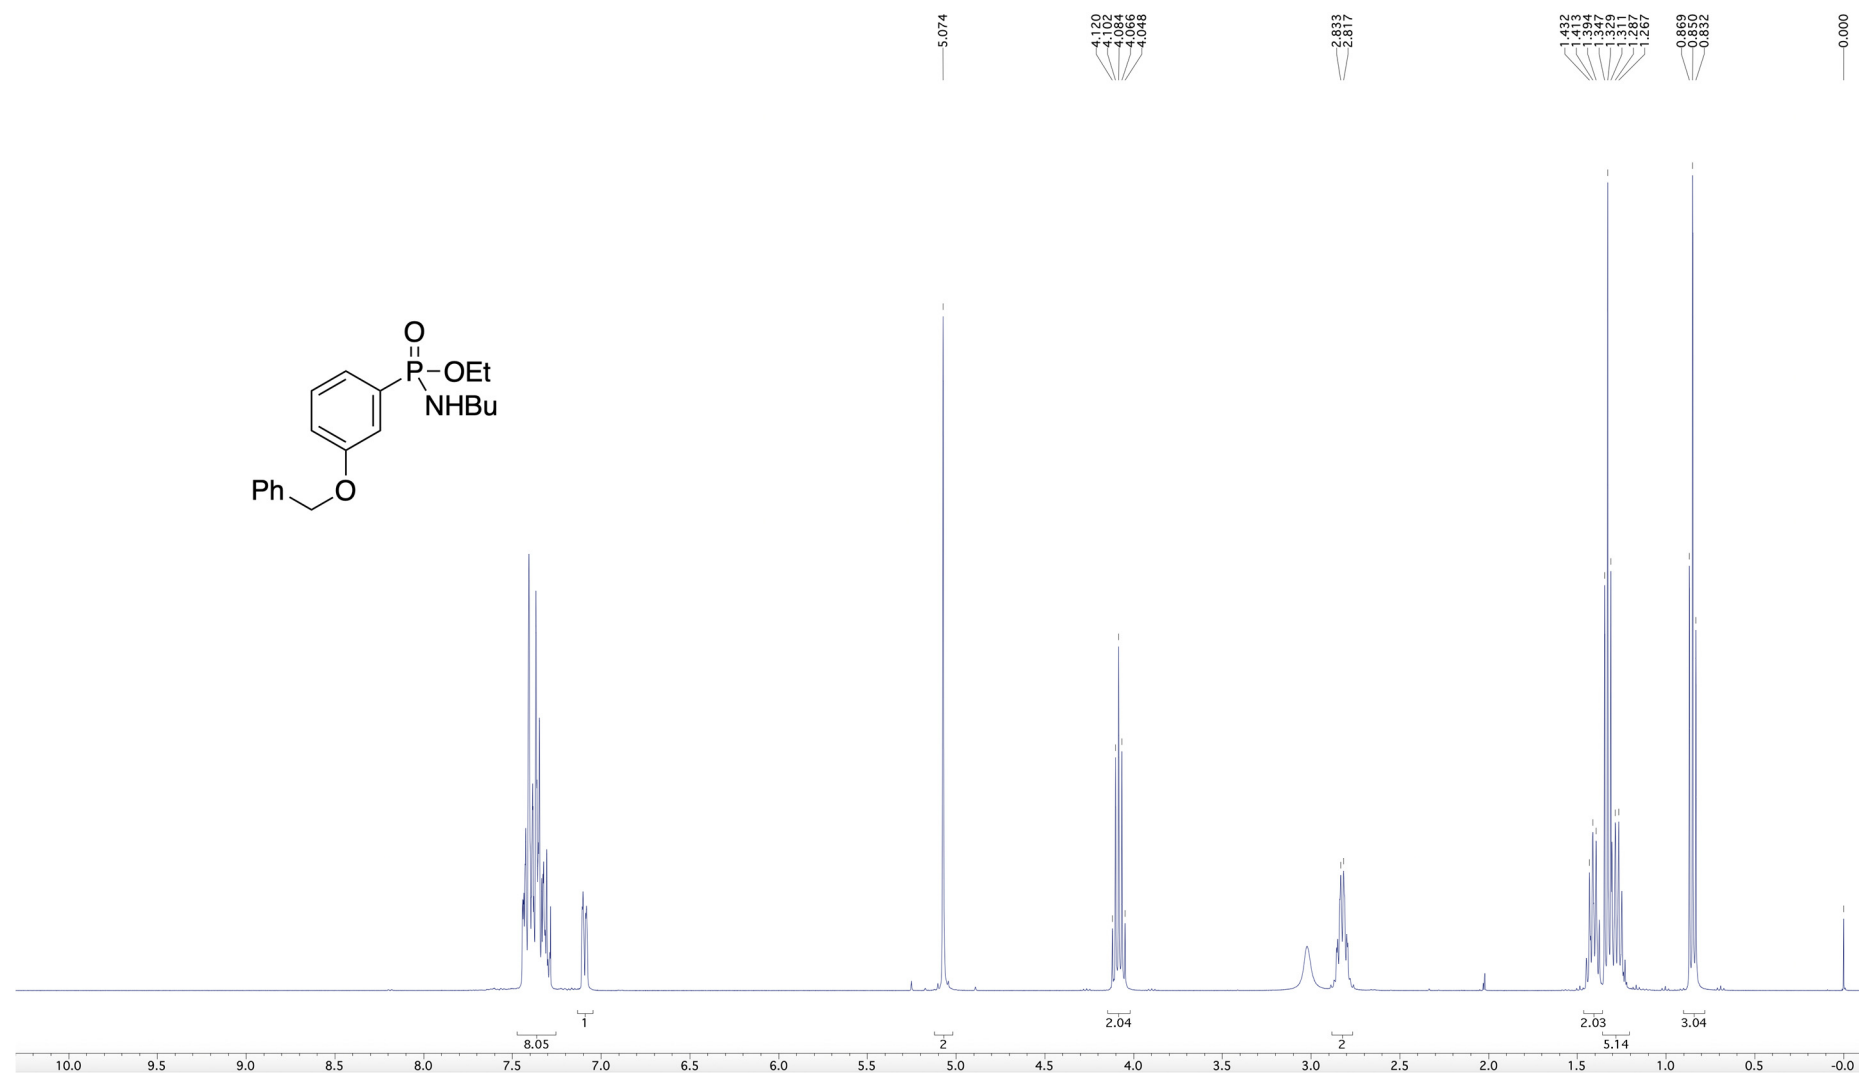

Figure S52. 202 MHz  $^{31}\text{P}$  NMR spectrum of **18**

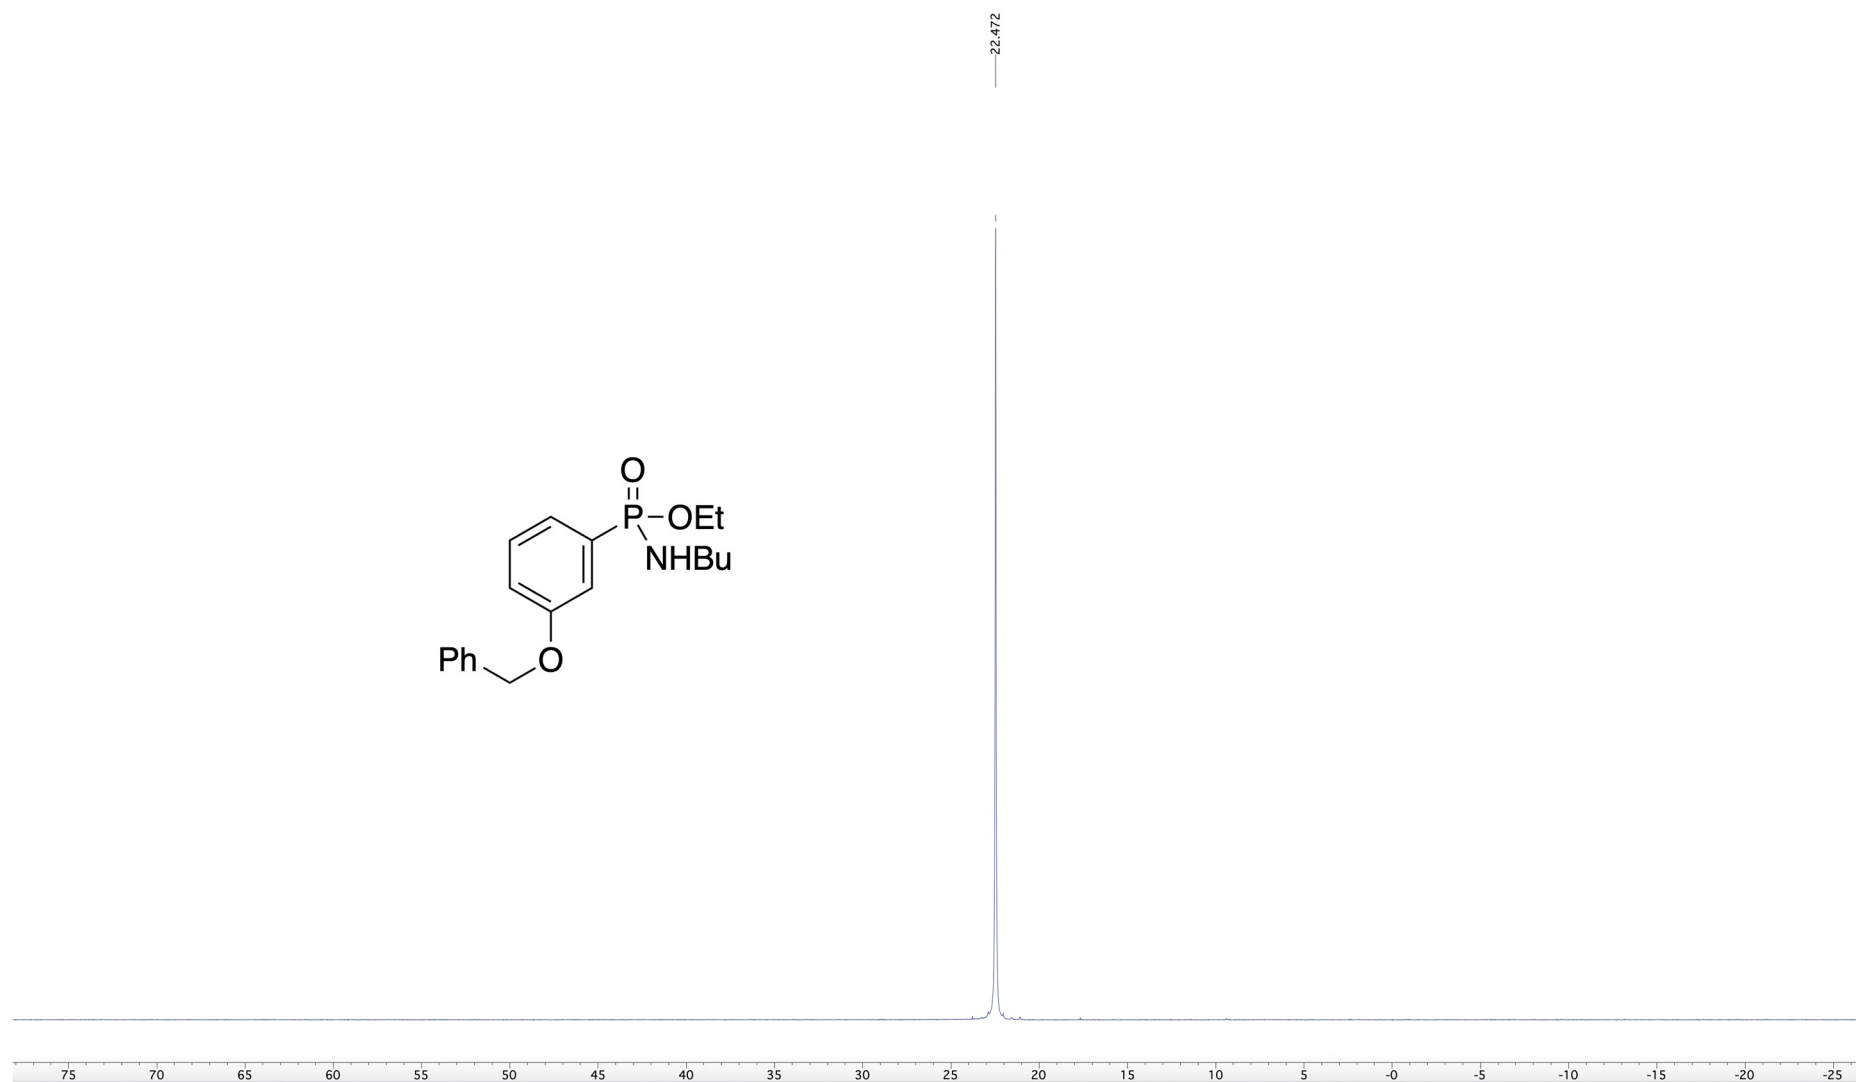

Figure S53. 125 MHz DEPTQ  $^{13}\text{C}$  NMR spectrum of **18**

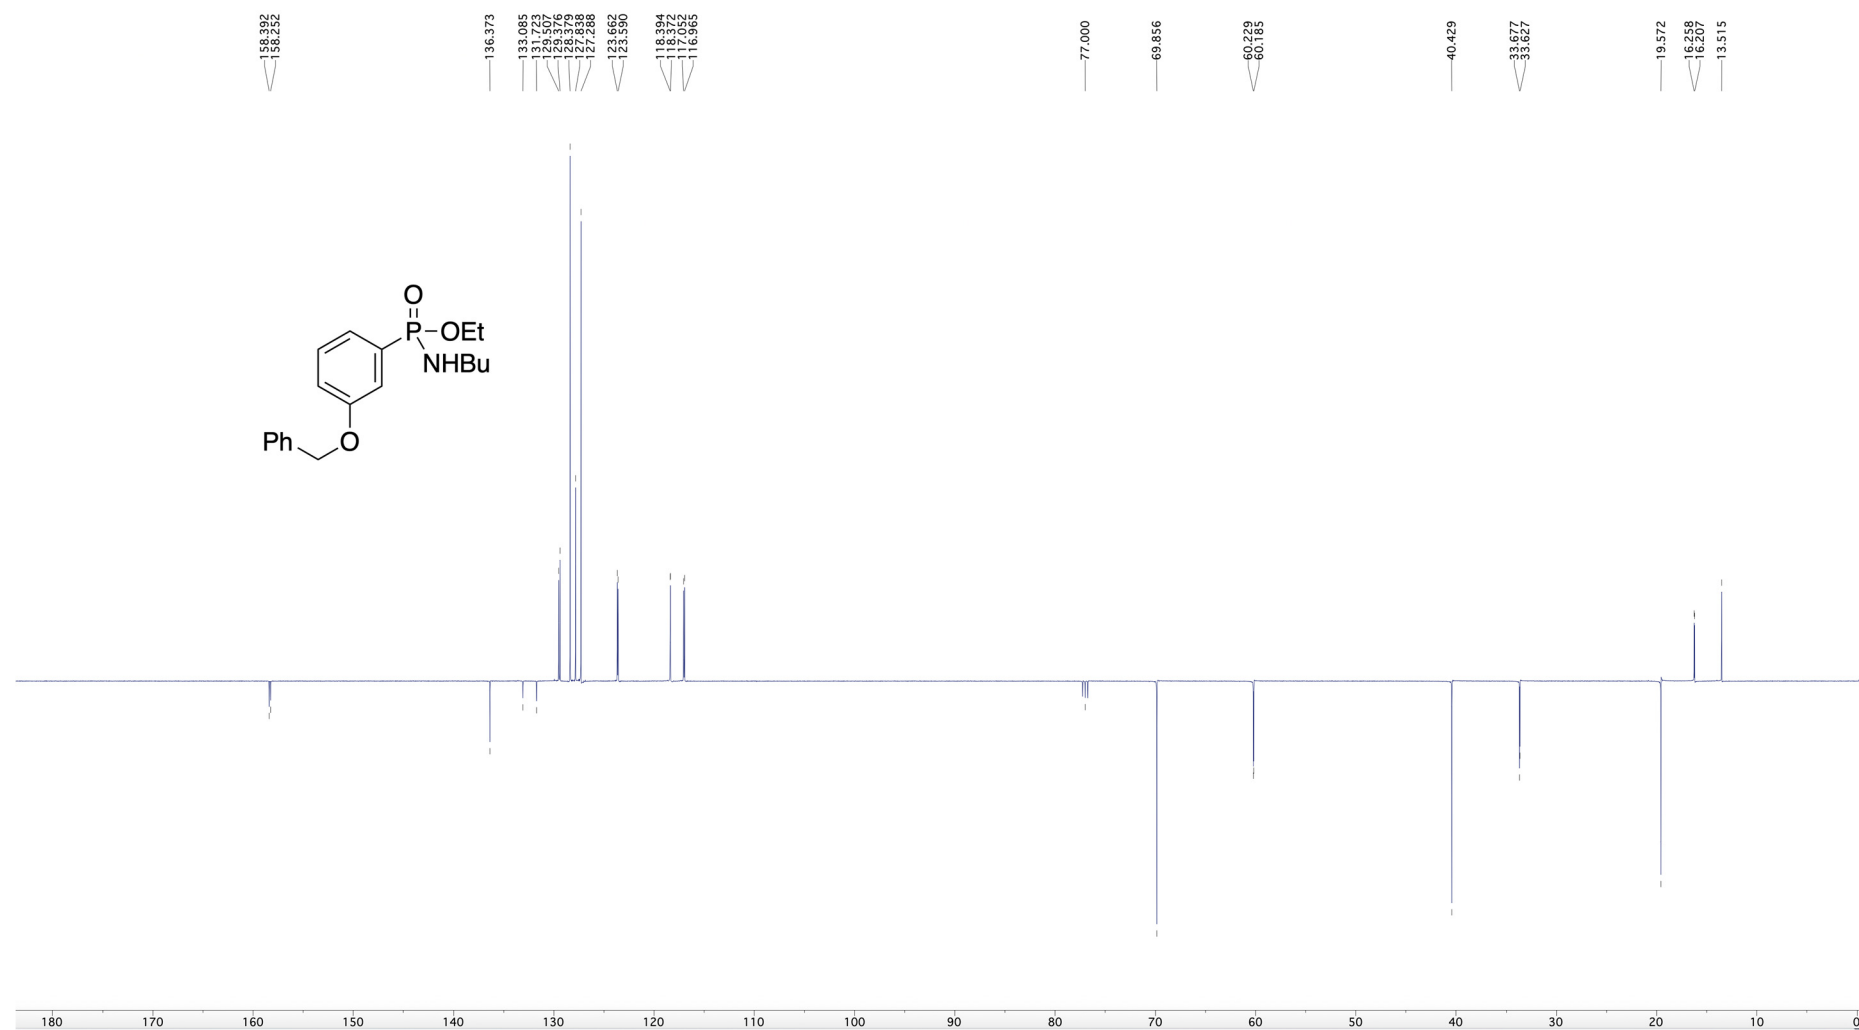

Figure S54. 500 MHz  $^1\text{H}$  NMR spectrum of **19**

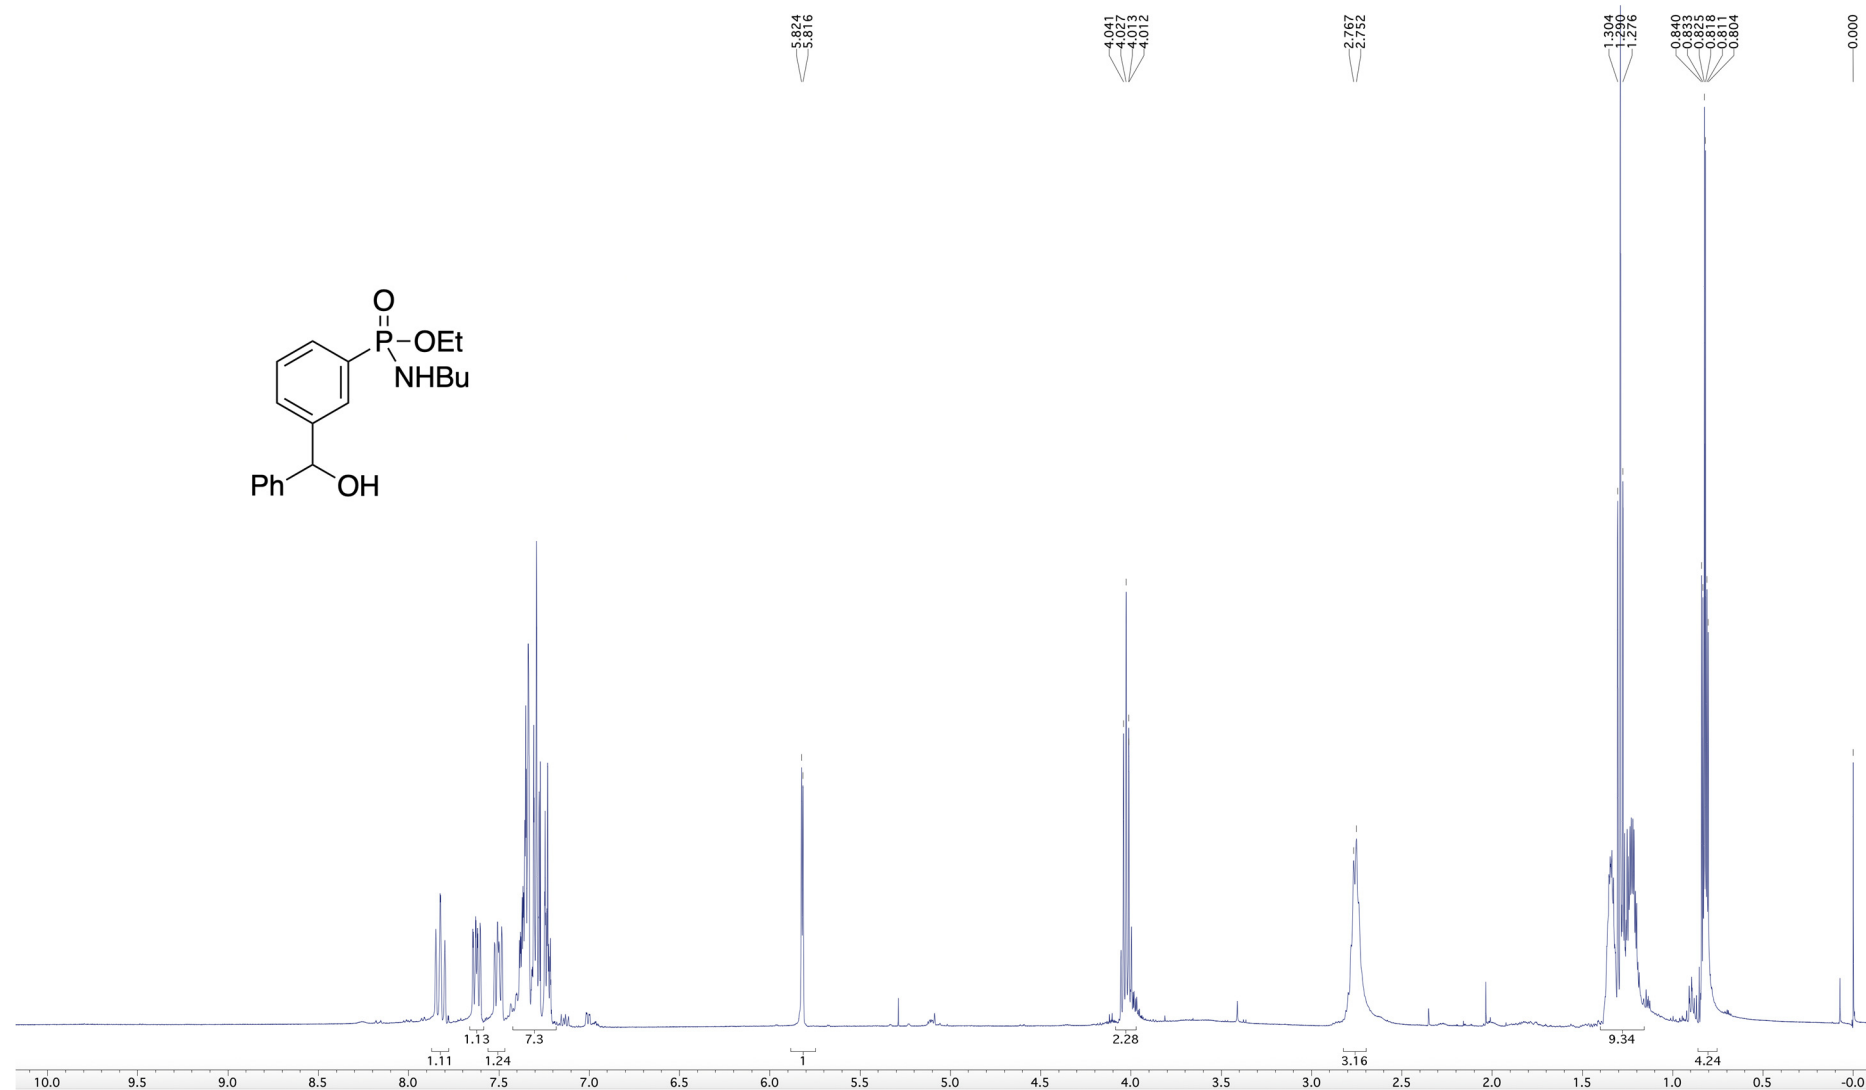

Figure S55. 202 MHz  $^{31}\text{P}$  NMR spectrum of **19**

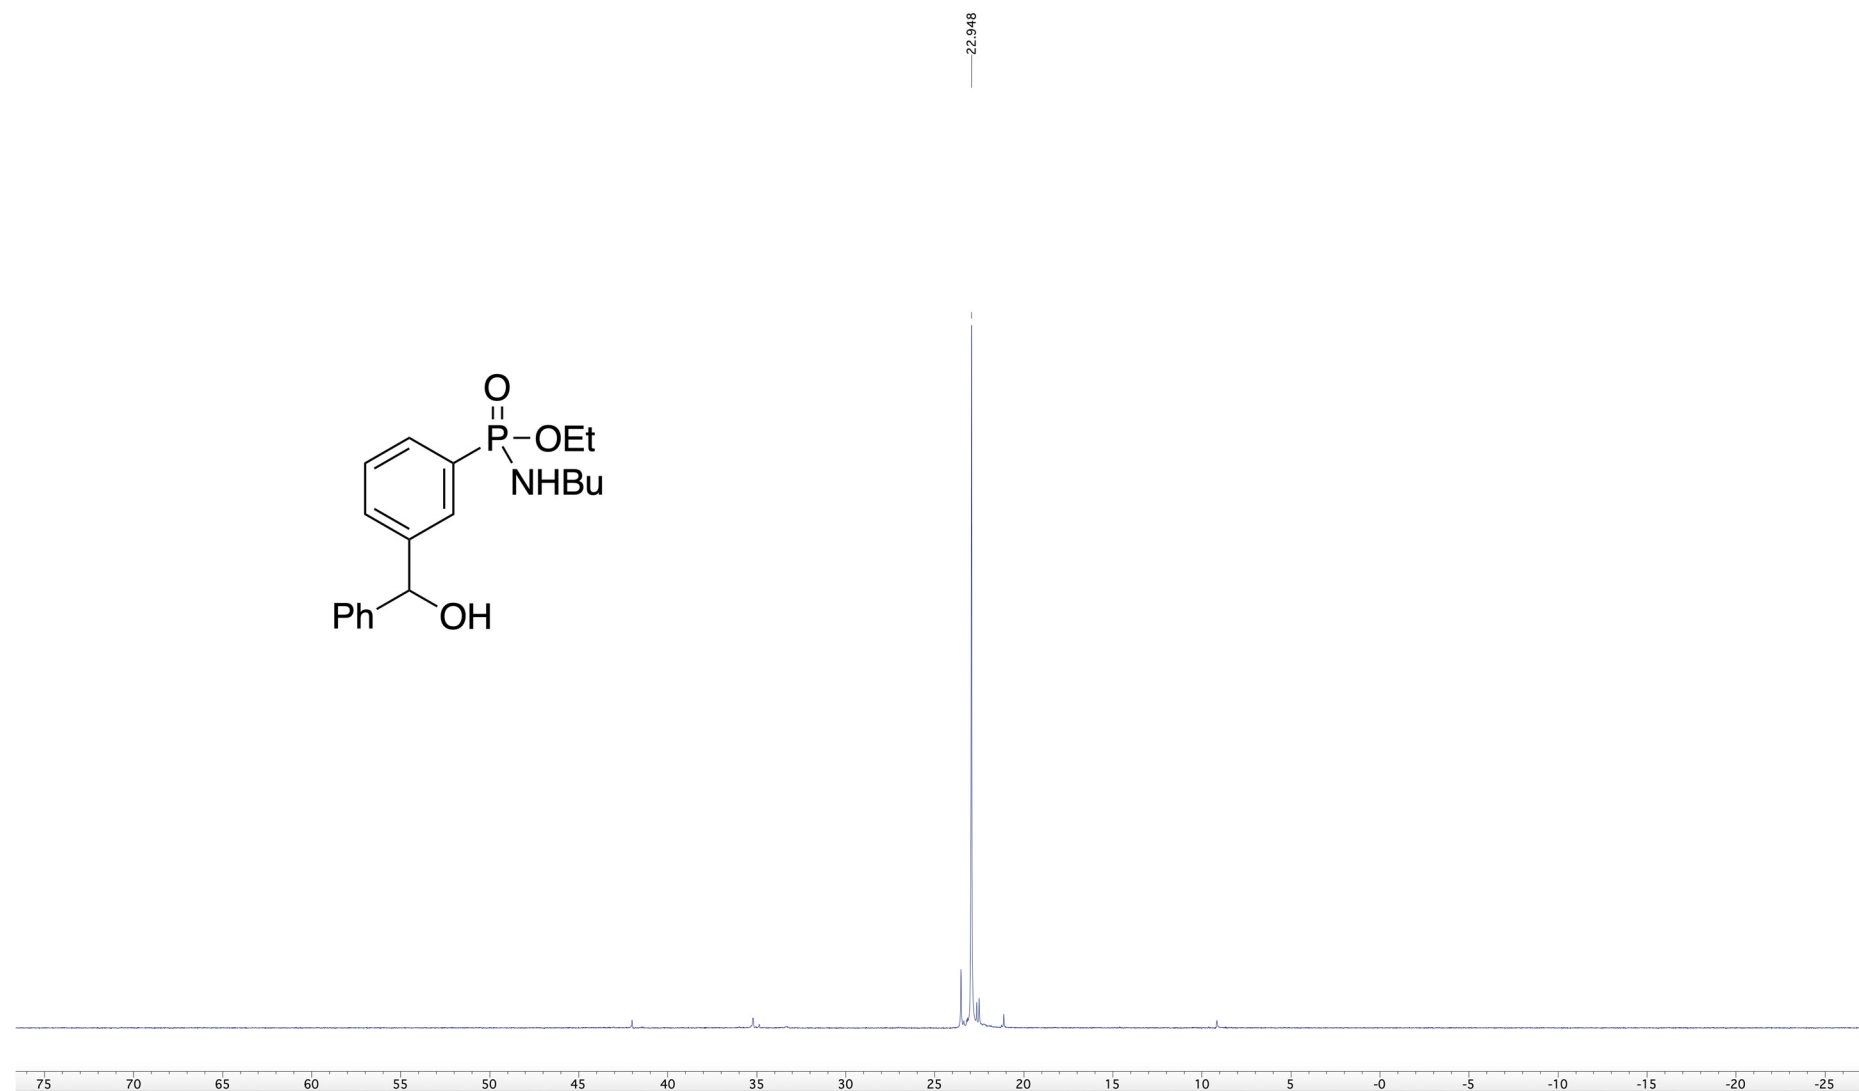

Figure S56. 125 MHz DEPTQ  $^{13}\text{C}$  NMR spectrum of **19**

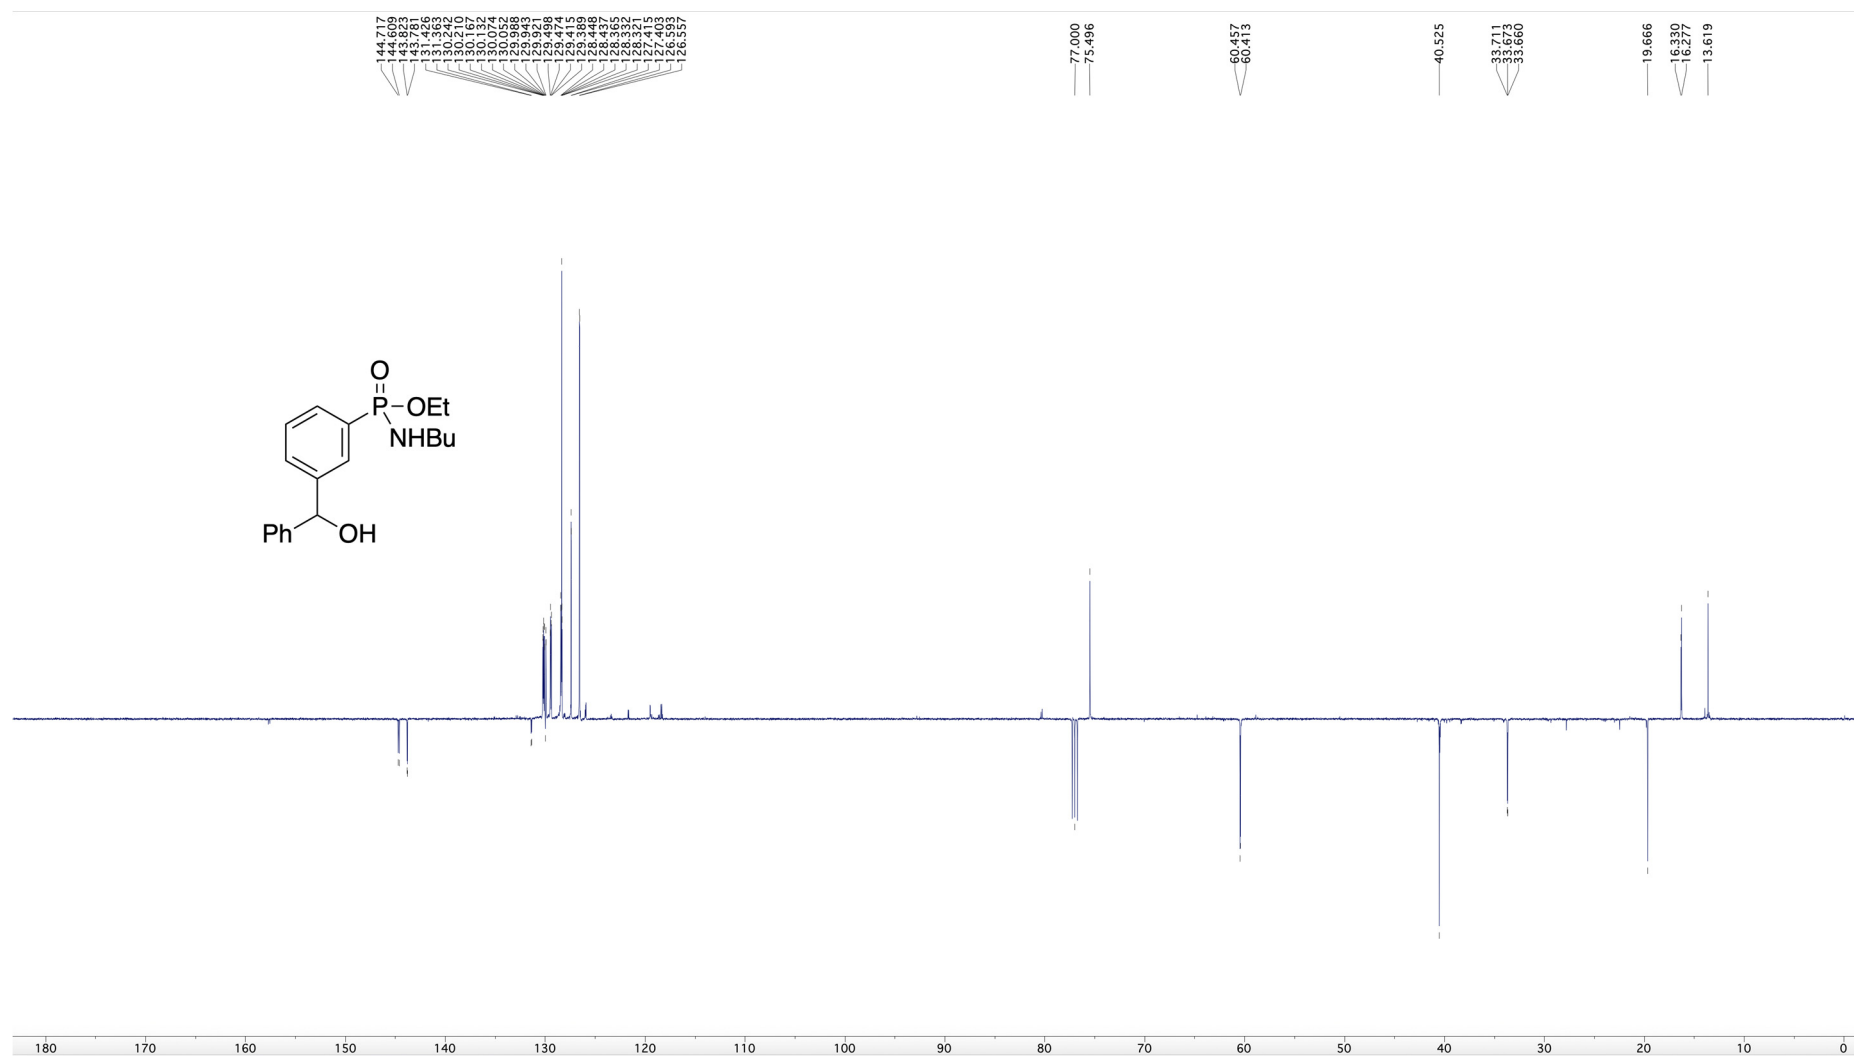

Figure S57. 125 MHz DEPTQ  $^{13}\text{C}$  NMR spectrum of **19** (Expansion)

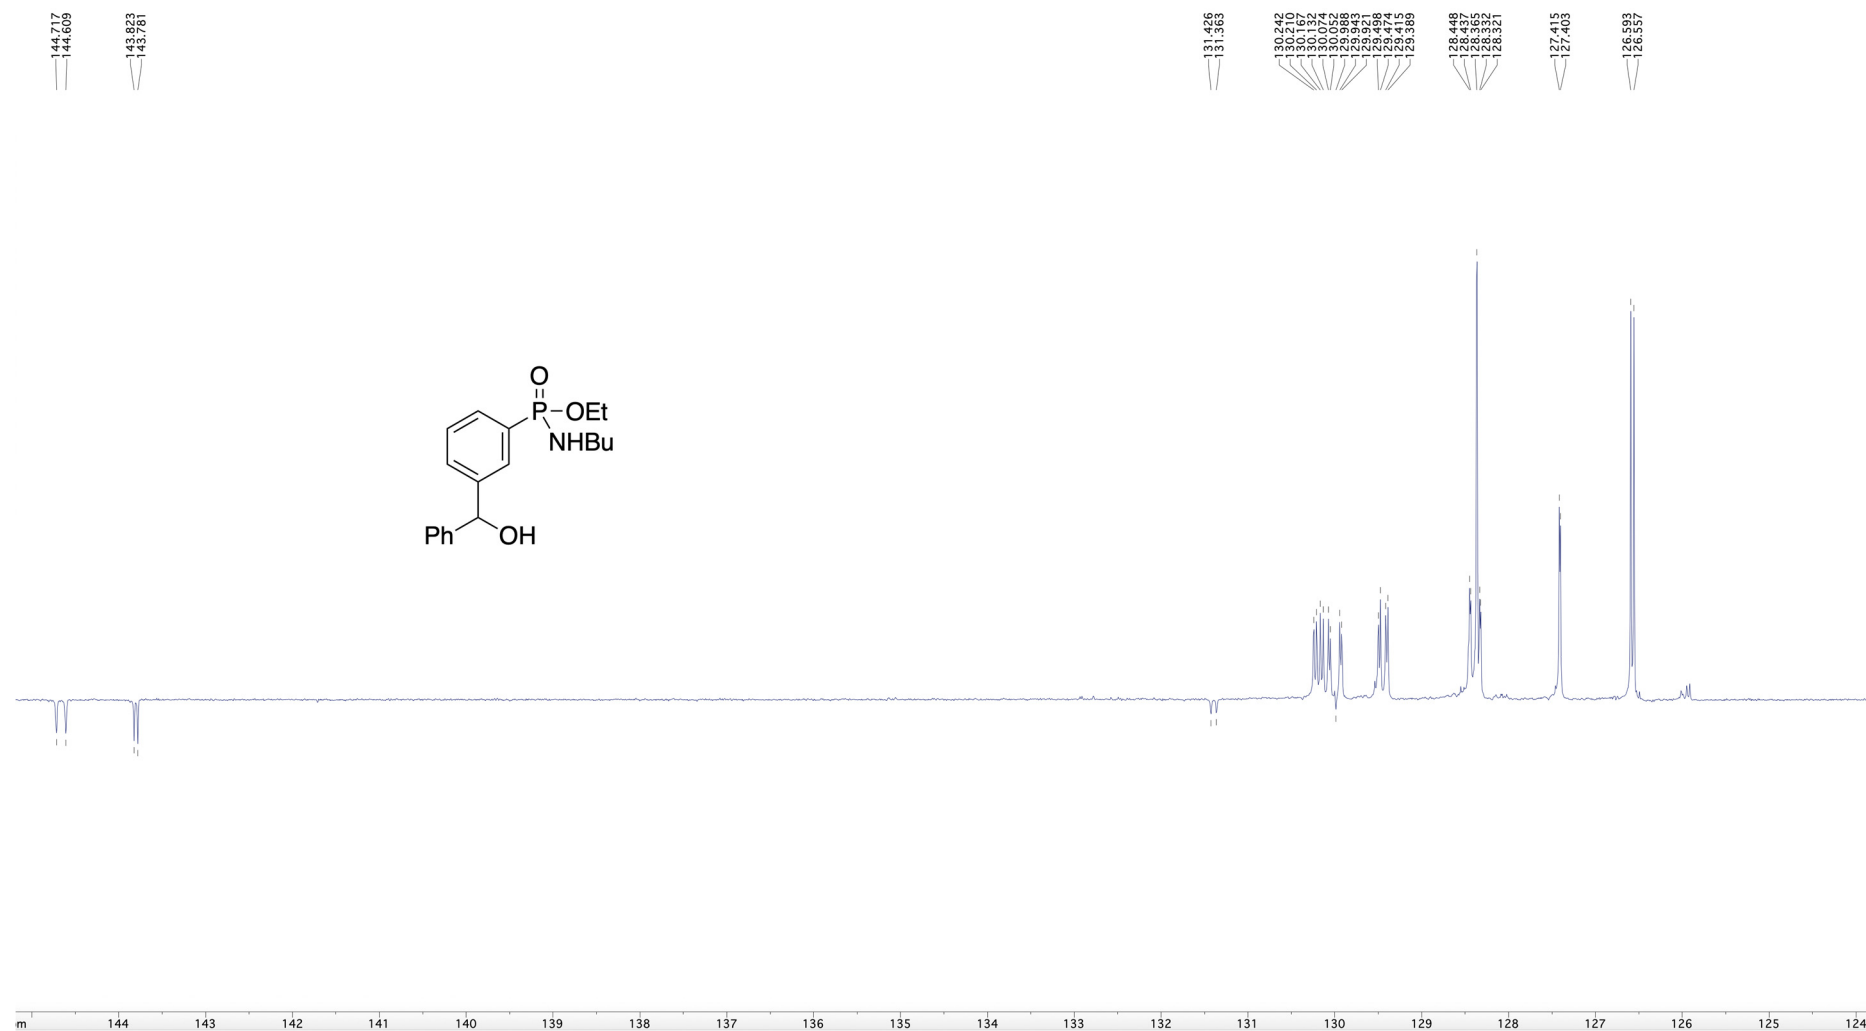

Supplement: s1 [file s1]
